# Supplementary material for: α-Regioselective [3 + 2] annulations with Morita–Baylis–Hillman carbonates of isatins and 2-nitro-1,3-enynes
Source: Royal Society of Chemistry journal article supplement (doi:10.1039/c6qo00118a), 2016-01-01
Supplement: c6qo00118a1.pdf [file c6qo00118a1.pdf]

## **$\alpha$ -Regioselective [3 + 2] Annulations with Morita–Baylis–Hillman**

### **Carbonates of Isatins and 2-Nitro-1,3-enynes**

Guang-Yao Ran,<sup>a</sup> Pan Wang,<sup>a</sup> Wei Du,<sup>a</sup> and Ying-Chun Chen<sup>\*a,b</sup>

<sup>a</sup>*Key Laboratory of Drug-Targeting and Drug Delivery System of the Ministry of Education, West China School of Pharmacy, Sichuan University, Chengdu 610041, China,*

<sup>b</sup>*College of Pharmacy, Third Military Medical University, Shapingba, Chongqing 400038, China*

E-mail: ycchen@scu.edu.cn

## **Supplementary Information**

### **Table of Contents**

|                                                                       |            |
|-----------------------------------------------------------------------|------------|
| <b>1. General methods .....</b>                                       | <b>S2</b>  |
| <b>2. Additional screening studies.....</b>                           | <b>S2</b>  |
| <b>3. General procedure for [3 + 2] annulation reaction .....</b>     | <b>S3</b>  |
| <b>4. Synthetic transformations of product 3r .....</b>               | <b>S11</b> |
| <b>5. Crystal data and structure refinement for enantiopure .....</b> | <b>S13</b> |
| <b>6. NMR spectra and HPLC chromatograms .....</b>                    | <b>S14</b> |

## 1. General methods

NMR data were obtained for  $^1\text{H}$  at 400 MHz and for  $^{13}\text{C}$  at 100 MHz. Chemical shifts were given in parts per million ( $\delta$ ) from tetramethylsilane with the solvent resonance as the internal standard in  $\text{CDCl}_3$  solution. ESI HRMS was recorded on a Waters SYNAPT G2. In each case, enantiomeric ratio was determined by HPLC analysis on a chiral column in comparison with authentic racemate, using a Daicel Chiralpak IA Column (250  $\times$  4.6 mm), Chiralpak ID Column (250  $\times$  4.6 mm), Chiralpak OD Column (250  $\times$  4.6 mm) or Chiralpak AD Column (250  $\times$  4.6 mm). UV detection was monitored at 220 nm or 254 nm. Optical rotation data were examined in  $\text{CHCl}_3$  or EtOAc solution at 20  $^\circ\text{C}$ . Column chromatography was performed on silica gel (200-300 mesh) eluting with ethyl acetate and petroleum ether. TLC was performed on glass-backed silica plates. UV light and  $\text{I}_2$  were used to visualize products. All chemicals were used without purification as commercially available unless otherwise noted. THF, ethyl acetate (EA), petroleum ether (PE), methylene chloride ( $\text{CH}_2\text{Cl}_2$ ), toluene, and  $\text{CH}_3\text{CN}$  were distilled before use. Cinchona alkaloids catalysts  $\beta$ -ICD **C3**, **C4**, and  $\alpha$ -IC **C5** were prepared according to the literature procedures.<sup>1</sup> 2-Nitro-1,3-enynes and  $\alpha$ -phenyl- or styryl-nitroolefins were synthesized based on the reported method.<sup>2</sup>

1 (a) Y. Iwabuchi, M. Nakatani, N. Yokoyama and S. Hatakeyama, *J. Am. Chem. Soc.*, 1999, **121**, 10219; (b) Y. Nakamoto, F. Urabe, K. Takahashi, J. Ishihara and S. Hatakeyama, *Chem. Eur. J.*, 2013, **19**, 12653.

2 (a) G. Bharathiraja, S. Sakthivel, M. Sengoden and T. Punniyamurthy, *Org. Lett.*, 2013, **15**, 4996; (b) M. Ganesh and I. N. N. Namboothiri, *Tetrahedron*, 2007, **63**, 11973.

## 2. Additional screening studies<sup>a</sup>

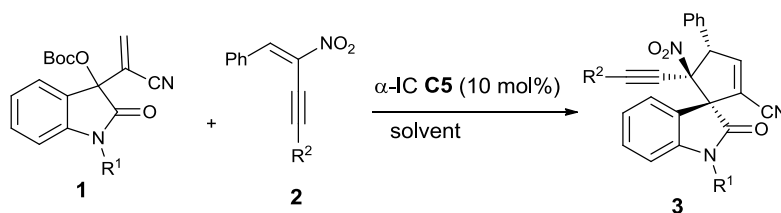

| Entry | R <sup>1</sup> | R <sup>2</sup>        | Solvent         | <i>t</i> (min) | Yield (%) <sup>b</sup> | dr <sup>c</sup> | ee (%) <sup>d</sup> |
|-------|----------------|-----------------------|-----------------|----------------|------------------------|-----------------|---------------------|
| 1     | Me             | Ph                    | $\text{CHCl}_3$ | 120            | 71                     | > 19:1          | 55                  |
| 2     | Me             | BocOCH <sub>2</sub> - | $\text{CHCl}_3$ | 50             | 77                     | > 19:1          | 74                  |
| 3     | Bn             | BnOCH <sub>2</sub> -  | $\text{CHCl}_3$ | 25             | 88                     | > 19:1          | 86                  |
| 4     | Bn             | BnOCH <sub>2</sub> -  | DCM             | 25             | 88                     | > 19:1          | 85                  |
| 5     | Bn             | BnOCH <sub>2</sub> -  | Toluene         | 300            | 71                     | > 19:1          | 84                  |

|   |    |                      |                    |    |    |        |    |
|---|----|----------------------|--------------------|----|----|--------|----|
| 6 | Bn | BnOCH <sub>2</sub> - | EtOAc              | 60 | 68 | > 19:1 | 85 |
| 7 | Bn | BnOCH <sub>2</sub> - | CH <sub>3</sub> CN | 40 | 43 | > 19:1 | 83 |

<sup>a</sup> Reactions were performed with 0.1 mmol of **1**, 0.11 mmol of **2**, 10 mol% of **C5** in 1 mL solvent. <sup>b</sup> Isolated yield.

<sup>c</sup> Determined by <sup>1</sup>H NMR analysis. <sup>d</sup> Based on chiral HPLC analysis.

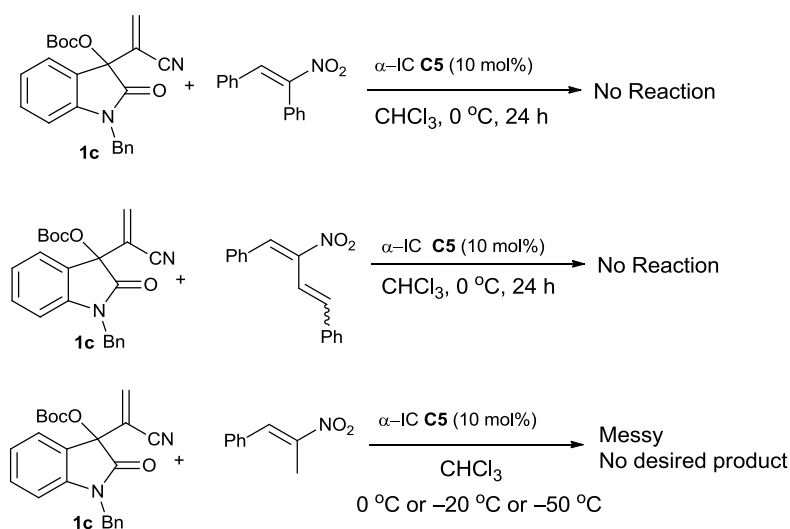

Scheme S1. The reactions of MBH carbonate and other  $\alpha$ -substituted nitroalkenes

As shown in Scheme S1,  $\alpha$ -phenyl and  $\alpha$ -styryl nitroalkenes exhibited very poor reactivity with the MBH carbonate under the optimised conditions; while  $\alpha$ -methyl nitroalkene did not provide the desired product even at low temperature ( $-20$  °C or  $-50$  °C). These results demonstrated that the  $\alpha$ -alkynyl group is vital to the reaction. Actually, the alkynyl group had been proven to be more electron negative than vinyl group.<sup>3</sup> It could stabilize the carboanion of the intermediate, resulting in higher reactivity than the phenyl, vinyl or methyl substituted nitroolefins. In addition, the  $\alpha$ -alkynyl substituent provided extra steric hindrance, rendering the  $\gamma$ -selective transition state congested.<sup>4</sup> Thus it led to  $\alpha$ -selectivity for the [3 + 2] annulation.

3. S.-J. Min, G. O. Jones, K. N. Houk and S. J. Danishefsky, *J. Am. Chem. Soc.*, 2007, **129**, 10078.

4 (a) K.-K. Wang, T. Jin, X. Huang, Q. Ouyang, W. Du and Y.-C. Chen, *Org. Lett.*, 2016, **18**, 872; (b) G. Zhan, M.-L. Shi, Q. He, W.-J. Lin, Q. Ouyang, W. Du and Y.-C. Chen, *Angew. Chem., Int. Ed.*, 2016, **55**, 2147.

### 3. General procedure for [3 + 2] annulation reaction

A solution of MBH carbonate **1** (0.1 mmol) and (*E*)-2-nitro-1,3-enyne **2** (0.11 mmol) in CHCl<sub>3</sub> (1.0 mL) was cooled to 0 °C and  $\alpha$ -IC **C5** (10 mol%) was added in one portion. The reaction was stirred for a few minutes at the same temperature. Upon workup, product **3** was obtained by flash

chromatography on silica gel (EtOAc/petroleum ether = 1:8).

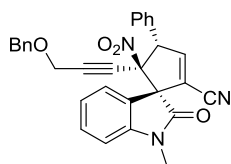

**3a**, colorless oil, 36.2 mg, 74% yield;  $[\alpha]_D^{20} = -183$  ( $c = 0.19$  in  $\text{CHCl}_3$ ); 80% ee, determined by HPLC analysis [Daicel Chiralpak AD, *n*-hexane/*i*-PrOH = 60/40,

1.0 mL/min,  $\lambda = 254$  nm,  $t$  (minor) = 6.52 min,  $t$  (major) = 10.21 min];  $^1\text{H}$  NMR

(400 MHz,  $\text{CDCl}_3$ ):  $\delta$  (ppm) 7.49 (d,  $J = 6.8$  Hz, 2H), 7.44-7.29 (m, 7H), 7.25-7.19 (m, 3H), 7.14-7.07 (m, 2H), 6.86 (d,  $J = 8.0$  Hz, 1H), 5.42 (d,  $J = 2.4$  Hz, 1H), 4.08 (d,  $J = 1.6$  Hz, 2H), 3.91, 3.90 (ABq,  $J = 16.8$  Hz, 2H), 3.18 (s, 3H);  $^{13}\text{C}$  NMR (100 MHz,  $\text{CDCl}_3$ ):  $\delta$  (ppm)  $^{13}\text{C}$  NMR (100 MHz,  $\text{CDCl}_3$ )  $\delta$  171.9, 152.0, 144.9, 137.5, 135.4, 132.2, 130.9, 129.3, 128.9, 128.8, 128.7, 128.3, 124.5, 124.3, 122.5, 115.9, 113.1, 109.6, 100.1, 94.8, 71.5, 69.9, 61.1, 57.0, 27.42. ESI-HRMS: calcd. for  $\text{C}_{30}\text{H}_{23}\text{N}_3\text{O}_4 + \text{Na}^+$  512.1581, found 512.1580.

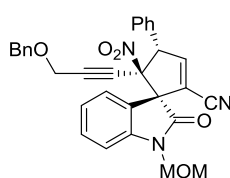

**3b**, white solid, 36.9 mg, 71% yield;  $[\alpha]_D^{20} = -249$  ( $c = 0.13$  in  $\text{CHCl}_3$ ); 80% ee, determined by HPLC analysis [Daicel Chiralpak OD, *n*-hexane/*i*-PrOH = 60/40,

1.0 mL/min,  $\lambda = 254$  nm,  $t$  (major) = 16.36 min,  $t$  (minor) = 27.98 min];  $^1\text{H}$  NMR (400 MHz,  $\text{CDCl}_3$ ):  $\delta$  (ppm) 7.48-7.09 (m, 15H), 5.53 (d,  $J = 2.0$  Hz, 1H),

5.18, 5.09 (ABq,  $J = 11.2$  Hz, 2H), 4.08 (s, 2H), 3.90 (s, 2H), 3.31 (s, 3H);  $^{13}\text{C}$  NMR (100 MHz,  $\text{CDCl}_3$ ):  $\delta$  (ppm) 171.7, 151.2, 142.7, 137.0, 134.8, 131.8, 130.3, 128.9, 128.5, 128.3, 128.1, 127.9, 124.2, 124.0, 121.8, 115.6, 112.5, 110.7, 99.7, 94.5, 72.0, 71.1, 69.4, 60.1, 56.5, 56.3; ESI-HRMS: calcd. for  $\text{C}_{31}\text{H}_{25}\text{N}_3\text{O}_5 + \text{Na}^+$  542.1686, found 542.1680.

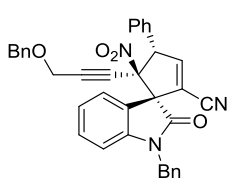

**3c**, white semisolid, 49.7 mg, 88% yield;  $[\alpha]_D^{20} = -195$  ( $c = 0.12$  in  $\text{CHCl}_3$ ); 87% ee, determined by HPLC analysis: [Daicel Chiralpak OD,

*n*-hexane/*i*-PrOH = 60/40, 1.0 mL/min,  $\lambda = 254$  nm,  $t$  (major) = 27.93 min,  $t$  (minor) = 40.32 min];  $^1\text{H}$  NMR (400 MHz,  $\text{CDCl}_3$ ):  $\delta$  (ppm) 7.51 (d,  $J = 7.6$  Hz,

2H), 7.37 (t,  $J = 7.2$  Hz, 2H), 7.32-7.20 (m, 12H), 7.15 (d,  $J = 7.6$  Hz, 2H), 7.07 (t,  $J = 7.6$  Hz, 1H), 6.72 (d,  $J = 8.0$  Hz, 1H), 5.52 (d,  $J = 2.4$  Hz, 1H), 5.04 (d,  $J = 16.0$  Hz, 1H), 4.82 (d,  $J = 16.0$  Hz, 1H), 4.06, 4.01 (ABq,  $J_{\text{AB}} = 12.0$  Hz, 2H), 3.89, 3.79 (ABq,  $J_{\text{AB}} = 16.8$  Hz, 2H);  $^{13}\text{C}$  NMR (100 MHz,  $\text{CDCl}_3$ ):  $\delta$  (ppm) 171.5, 151.3, 143.7, 135.0, 134.6, 131.7, 130.4, 128.9, 128.9, 128.5, 128.3, 128.1, 127.8, 126.9, 124.1, 123.8, 115.8, 112.7, 110.2, 99.7, 94.5, 71.1, 69.2, 60.6, 56.5, 44.5; ESI-HRMS: calcd. for  $\text{C}_{36}\text{H}_{27}\text{N}_3\text{O}_4 + \text{Na}^+$  588.1894, found 588.1894.

Enantiomer of **3c**, white semisolid, 40.1 mg, 71% yield;  $[\alpha]_D^{20} = 203$  ( $c = 0.12$  in  $\text{CHCl}_3$ ); -92% ee, determined by HPLC analysis: [Daicel Chiralpak OD, *n*-hexane/*i*-PrOH = 60/40, 1.0 mL/min,  $\lambda = 254$  nm,  $t$  (minor) = 29.57 min,  $t$  (major) = 40.24 min].

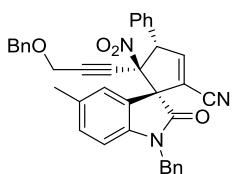

**3d**, white solid, 48.1 mg, 83% yield;  $[\alpha]_D^{20} = -256$  ( $c = 1.12$  in  $\text{CHCl}_3$ ); 86% ee, determined by HPLC analysis: [Daicel Chiralpak OD, *n*-hexane/*i*-PrOH = 60/40, 1.0 mL/min,  $\lambda = 254$  nm,  $t$  (major) = 16.20 min,  $t$  (minor) = 27.06 min];  $^1\text{H}$  NMR (400 MHz,  $\text{CDCl}_3$ ):  $\delta$  (ppm) 7.51 (d,  $J = 7.2$  Hz, 2H), 7.37 (t,  $J = 6.8$  Hz,

2H), 7.32-7.15 (m, 12H), 7.09 (d,  $J = 8.0$  Hz, 1H), 6.95 (s, 1H), 6.60 (d,  $J = 8.0$  Hz, 1H), 5.52 (d,  $J = 2.4$  Hz, 1H), 5.02 (d,  $J = 16.0$  Hz, 1H), 4.81 (d,  $J = 16.0$  Hz, 1H), 4.09, 4.00 (ABq,  $J = 11.6$  Hz, 2H), 3.90, 3.80 (ABq,  $J = 16.4$  Hz, 2H), 2.31 (s, 3H);  $^{13}\text{C}$  NMR (100 MHz,  $\text{CDCl}_3$ ):  $\delta$  (ppm) 171.4, 151.1, 141.2, 134.9, 132.0, 130.4, 128.9, 128.5, 128.3, 128.1, 127.8, 127.7, 126.8, 124.7, 115.9, 112.7, 109.9, 99.8, 94.4, 71.1, 69.3, 60.4, 56.6, 44.5, 21.1; ESI-HRMS: calcd. for  $\text{C}_{37}\text{H}_{29}\text{N}_3\text{O}_4 + \text{Na}^+$  602.2050, found 602.2048.

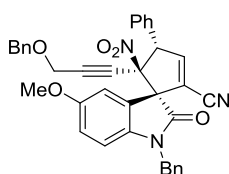

**3e**, white semisolid, 52.4 mg, 88% yield;  $[\alpha]_D^{20} = -246$  ( $c = 0.29$  in  $\text{CHCl}_3$ ); 95% ee, determined by HPLC analysis: [Daicel Chiralpak OD, *n*-hexane/*i*-PrOH = 60/40, 1.0 mL/min,  $\lambda = 254$  nm,  $t$  (minor) = 11.13 min,  $t$  (major) = 24.96 min];  $^1\text{H}$  NMR (400 MHz,  $\text{CDCl}_3$ ):  $\delta$  (ppm) 7.51 (d,  $J = 7.2$

Hz, 2H), 7.37 (t,  $J = 7.2$  Hz, 2H), 7.32-7.15 (m, 12H), 6.80 (dd,  $J = 8.4$  Hz, 2.4 Hz, 1H), 3.75 (d,  $J = 2.4$  Hz, 1H), 6.61 (d,  $J = 8.8$  Hz, 1H), 5.49 (d,  $J = 2.8$  Hz, 1H), 5.01 (d,  $J = 16.0$  Hz, 1H), 4.80 (d,  $J = 16.0$  Hz, 1H), 4.06, 4.01 (ABq,  $J = 11.6$  Hz, 2H), 3.90, 3.80 (ABq,  $J = 16.4$  Hz, 2H), 3.75 (s, 3H);  $^{13}\text{C}$  NMR (100 MHz,  $\text{CDCl}_3$ ):  $\delta$  (ppm) 171.3, 156.5, 151.4, 137.0, 136.8, 134.9, 134.7, 130.5, 128.9, 128.5, 128.3, 128.2, 126.9, 116.0, 115.8, 112.7, 111.5, 110.6, 99.8, 94.5, 71.1, 69.5, 60.7, 56.5, 55.9, 44.5; ESI-HRMS: calcd. for  $\text{C}_{37}\text{H}_{29}\text{N}_3\text{O}_5 + \text{Na}^+$  618.1999, found 618.1998.

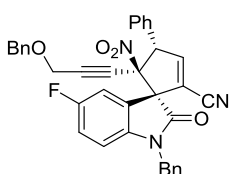

**3f**, white solid, 42.0 mg, 72% yield;  $[\alpha]_D^{20} = -201$  ( $c = 0.24$  in  $\text{CHCl}_3$ ); 86% ee, determined by HPLC analysis: [Daicel Chiralpak AD, *n*-hexane/*i*-PrOH = 60/40, 1.0 mL/min,  $\lambda = 254$  nm,  $t$  (minor) = 5.91 min,  $t$  (major) = 17.67 min];  $^1\text{H}$  NMR (400 MHz,  $\text{CDCl}_3$ ):  $\delta$  (ppm) 7.50 (d,  $J = 7.6$  Hz, 2H), 7.37 (t,  $J = 7.2$  Hz,

2H), 7.33-7.15 (m, 12H), 7.01 (td,  $J = 8.4$  Hz, 2.4 Hz, 1H), 6.92 (dd,  $J = 8.0$  Hz, 2.8 Hz, 1H), 6.64

(dd,  $J = 8.4$  Hz, 4.0 Hz, 1H), 5.47 (d,  $J = 2.4$  Hz, 1H), 5.02 (d,  $J = 16.4$  Hz, 1H), 4.80 (d,  $J = 16.0$  Hz, 1H), 4.06, 4.01 (ABq,  $J = 11.6$  Hz, 2H), 3.90, 3.81 (ABq,  $J = 16.4$  Hz, 2H);  $^{13}\text{C}$  NMR (100 MHz,  $\text{CDCl}_3$ ):  $\delta$  (ppm) 171.4, 160.6, 158.2, 151.9, 139.7, 139.7, 137.0, 134.7, 134.2, 130.5, 129.0, 128.5, 128.4, 128.2, 128.0, 127.9, 126.9, 123.7, 118.4, 118.2, 115.3, 112.6, 112.5, 112.4, 110.9, 110.9, 99.6, 94.8, 71.1, 69.3, 60.8, 56.5, 44.6; ESI-HRMS: calcd. for  $\text{C}_{36}\text{H}_{26}\text{FN}_3\text{O}_4 + \text{Na}^+$  606.1800, found 606.1804.

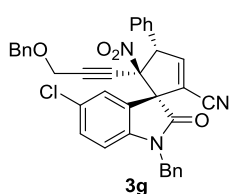

**3g**, white solid, 48.6 mg, 81% yield;  $[\alpha]_{\text{D}}^{20} = -250$  ( $c = 0.28$  in  $\text{CHCl}_3$ ); 84% ee, determined by HPLC analysis: [Daicel Chiralpak AD,  $n$ -hexane/ $i$ -PrOH = 60/40, 1.0 mL/min,  $\lambda = 254$  nm,  $t$  (minor) = 5.51 min,  $t$  (major) = 15.82 min];  $^1\text{H}$  NMR (400 MHz,  $\text{CDCl}_3$ ):  $\delta$  (ppm) 7.49 (d,  $J = 6.8$  Hz, 2H), 7.38 (t,  $J = 6.8$  Hz,

2H), 7.33-7.13 (m, 14H), 6.64 (d,  $J = 8.4$  Hz, 1H), 5.51 (d,  $J = 2.8$  Hz, 1H), 5.02 (d,  $J = 16.0$  Hz, 1H), 4.82 (d,  $J = 16.0$  Hz, 1H), 4.07, 4.03 (ABq,  $J = 12.0$  Hz, 2H), 3.89, 3.82 (ABq,  $J = 16.8$  Hz, 2H);  $^{13}\text{C}$  NMR (100 MHz,  $\text{CDCl}_3$ ):  $\delta$  (ppm) 171.0, 151.8, 142.2, 134.1, 131.7, 130.4, 129.3, 129.0, 128.5, 128.3, 128.1, 128.0, 127.9, 126.9, 124.5, 115.2, 112.5, 111.2, 99.7, 94.9, 71.2, 68.9, 60.4, 56.5, 44.6; ESI-HRMS: calcd. for  $\text{C}_{36}\text{H}_{26}\text{ClN}_3\text{O}_4 + \text{Na}^+$  622.1504, found 622.1504.

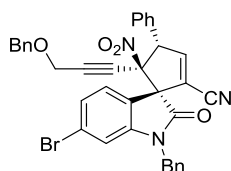

**3h**, white solid, 55.4 mg, 86% yield;  $[\alpha]_{\text{D}}^{20} = -199$  ( $c = 0.60$  in  $\text{CHCl}_3$ ); 82% ee, determined by HPLC analysis: [Daicel Chiralpak AD,  $n$ -hexane/ $i$ -PrOH = 60/40, 1.0 mL/min,  $\lambda = 254$  nm,  $t$  (minor) = 7.22 min,  $t$  (major) = 15.30 min];  $^1\text{H}$  NMR (400 MHz,  $\text{CDCl}_3$ ):  $\delta$  (ppm) 7.49 (d,  $J = 7.2$  Hz, 2H), 7.37 (t,  $J = 7.2$

Hz, 2H), 7.33-7.21 (m, 11H), 7.17-7.15 (m, 2H), 7.01 (d,  $J = 8.0$  Hz, 1H), 6.88 (d,  $J = 1.6$  Hz, 1H), 5.47 (d,  $J = 2.4$  Hz, 1H), 5.01 (d,  $J = 16.0$  Hz, 1H), 4.80 (d,  $J = 8.0$  Hz, 1H), 4.05, 3.99 (ABq,  $J = 11.6$  Hz, 2H), 3.88, 3.78 (ABq,  $J = 16.8$  Hz, 2H);  $^{13}\text{C}$  NMR (100 MHz,  $\text{CDCl}_3$ ):  $\delta$  (ppm) 171.4, 151.8, 145.0, 130.4, 129.1, 129.0, 128.5, 128.4, 128.1, 128.1, 127.9, 126.9, 126.8, 125.3, 121.1, 115.1, 113.6, 112.4, 99.5, 94.9, 71.1, 68.9, 60.8, 56.5, 44.6; ESI-HRMS: calcd. for  $\text{C}_{36}\text{H}_{26}\text{BrN}_3\text{O}_4 + \text{Na}^+$  666.0999, found 666.0996

**3i**, white solid, 48.6 mg, 81% yield;  $[\alpha]_{\text{D}}^{20} = -153$  ( $c = 0.25$  in  $\text{CHCl}_3$ ); 86% ee, determined by HPLC analysis: [Daicel Chiralpak IA,  $n$ -hexane/ $i$ -PrOH = 60/40, 1.0 mL/min,  $\lambda = 254$  nm,  $t$  (minor) = 7.07 min,  $t$  (major) = 31.25 min];  $^1\text{H}$  NMR (400 MHz,  $\text{CDCl}_3$ ):  $\delta$  (ppm) 7.47 (d,  $J = 7.2$  Hz, 2H),

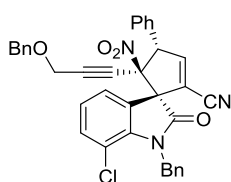

7.37-7.01 (m, 17H), 5.52 (d,  $J = 2.4$  Hz, 1H), 5.35 (d,  $J = 2.4$  Hz, 2H), 4.02, 3.92 (ABq,  $J = 11.6$  Hz, 2H), 3.84, 3.68 (ABq,  $J = 16.1$  Hz, 2H);  $^{13}\text{C}$  NMR (100 MHz,  $\text{CDCl}_3$ ):  $\delta$  (ppm) 172.1, 151.8, 137.0, 136.4, 134.7, 134.4, 130.4, 129.0, 128.7, 128.6, 128.3, 128.1, 127.8, 127.2, 126.1, 125.2, 124.6, 122.6,

116.3, 115.2, 112.5, 100.0, 95.0, 71.1, 68.8, 60.5, 56.5, 45.8; ESI-HRMS: calcd. for  $\text{C}_{36}\text{H}_{26}\text{ClN}_3\text{O}_4 + \text{Na}^+$  622.1504, found 622.1506.

Enantiomer of **3i**, white solid, 37.8 mg, 63% yield;  $[\alpha]_{\text{D}}^{20} = 146$  ( $c = 0.23$  in  $\text{CHCl}_3$ ); -84% ee, determined by HPLC analysis: [Daicel Chiralpak IA,  $n$ -hexane/ $i$ -PrOH = 60/40, 1.0 mL/min,  $\lambda = 254$  nm,  $t$  (minor) = 7.07 min,  $t$  (major) = 39.98 min].

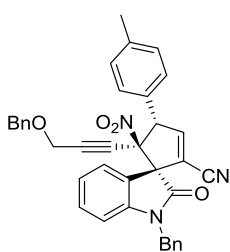

**3j**, white solid, 49.3 mg, 85% yield;  $[\alpha]_{\text{D}}^{20} = -209$  ( $c = 0.22$  in  $\text{CHCl}_3$ ); 86% ee, determined by HPLC analysis: [Daicel Chiralpak OD,  $n$ -hexane/ $i$ -PrOH = 60/40, 1.0 mL/min,  $\lambda = 254$  nm,  $t$  (minor) = 25.12 min,  $t$  (major) = 34.64 min];  $^1\text{H}$  NMR (400 MHz,  $\text{CDCl}_3$ ):  $\delta$  (ppm) 7.39 (d,  $J = 8.0$  Hz, 2H), 7.32-7.15 (m, 15H), 7.07 (t,  $J = 7.6$  Hz, 1H), 5.46 (d,  $J = 1.6$  Hz, 1H), 5.05 (d,  $J = 16.0$  Hz, 1H), 4.82

(d,  $J = 16.0$  Hz, 1H), 4.05, 4.00 (ABq,  $J = 12.0$  Hz, 2H), 3.93, 3.81 (ABq,  $J = 16.4$  Hz, 2H), 2.23 (s, 3H);  $^{13}\text{C}$  NMR (100 MHz,  $\text{CDCl}_3$ ):  $\delta$  (ppm) 171.6, 151.7, 143.7, 138.8, 134.6, 131.8, 131.7, 130.3, 129.2, 128.9, 128.3, 128.1, 127.8, 126.9, 124.1, 123.8, 115.4, 112.7, 110.2, 99.7, 94.3, 71.0, 69.2, 60.3, 56.6, 44.5, 21.1; ESI-HRMS: calcd. for  $\text{C}_{37}\text{H}_{29}\text{N}_3\text{O}_4 + \text{Na}^+$  602.2050, found 602.2051.

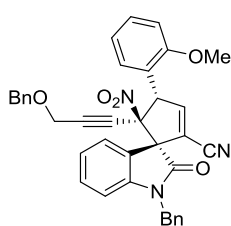

**3k**, white semisolid, 54.2 mg, 91% yield;  $[\alpha]_{\text{D}}^{20} = -84$  ( $c = 0.39$  in  $\text{CHCl}_3$ ); 93% ee, determined by HPLC analysis: [Daicel Chiralpak OD,  $n$ -hexane/ $i$ -PrOH = 60/40, 1.0 mL/min,  $\lambda = 254$  nm,  $t$  (minor) = 8.78 min,  $t$  (major) = 16.81 min];  $^1\text{H}$  NMR (400 MHz,  $\text{CDCl}_3$ ):  $\delta = 7.57$  (d,  $J = 7.2$  Hz, 1H), 7.32-7.13 (m, 14H),

7.08 (t,  $J = 7.6$  Hz, 1H), 7.02 (t,  $J = 7.6$  Hz, 1H), 6.84 (d,  $J = 8.4$  Hz, 1H), 6.71 (d,  $J = 7.6$  Hz, 1H), 5.71 (d,  $J = 6.8$  Hz, 1H), 4.94 (d,  $J = 8.0$  Hz, 1H), 4.74 (d,  $J = 8.0$  Hz, 1H), 4.00, 3.81 (ABq,  $J = 12.0$  Hz, 2H), 3.82, 3.63 (ABq,  $J = 19.6$  Hz, 2H), 3.76 (s, 3H);  $^{13}\text{C}$  NMR (100 MHz,  $\text{CDCl}_3$ ):  $\delta$  (ppm) 172.4, 157.4, 152.5, 144.0, 137.1, 131.6, 130.5, 130.1, 128.9, 128.3, 128.1, 127.8, 127.7, 126.8, 124.5, 124.4, 120.4, 115.4, 112.8, 110.1, 110.0, 98.3, 91.6, 70.8, 70.5, 56.4, 55.5, 44.4; ESI-HRMS: calcd. for  $\text{C}_{37}\text{H}_{29}\text{N}_3\text{O}_5 + \text{Na}^+$  618.1999, found 618.2002.

Enantiomer of **3k**, white semisolid, 41.7 mg, 70% yield;  $[\alpha]_{\text{D}}^{20} = 88$  ( $c = 0.13$  in  $\text{CHCl}_3$ ); -94% ee, determined by HPLC analysis: [Daicel Chiralpak OD, *n*-hexane/*i*-PrOH = 60/40, 1.0 mL/min,  $\lambda = 254$  nm,  $t$  (major)= 8.62 min,  $t$  (minor) = 17.14 min].

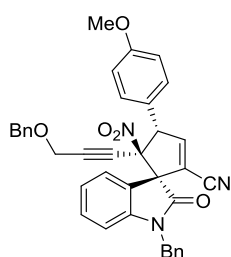

**3l**, white solid, 48.2 mg, 81% yield;  $[\alpha]_{\text{D}}^{20} = -379$  ( $c = 0.21$  in  $\text{CHCl}_3$ ); 85% ee, determined by HPLC analysis: [Daicel Chiralpak OD, *n*-hexane/*i*-PrOH = 60/40, 1.0 mL/min,  $\lambda = 254$  nm,  $t$  (minor) = 29.07 min,  $t$  (major) = 60.68 min];  $^1\text{H}$  NMR (400 MHz,  $\text{CDCl}_3$ ):  $\delta$  (ppm) 7.43 (d,  $J = 8.8$  Hz, 2H), 7.32-7.14 (m, 13H), 7.07 (t,  $J = 7.6$  Hz, 1H), 6.72 (d,  $J = 8.0$  Hz, 1H), 5.44 (d,  $J = 2.8$  Hz, 1H), 5.05

(d,  $J = 16.0$  Hz, 1H), 4.82 (d,  $J = 16.0$  Hz, 1H), 4.09, 4.03 (ABq,  $J_{\text{AB}} = 11.6$  Hz, 2H), 3.98, 3.78 (ABq,  $J = 11.6$  Hz, 2H), 3.67 (s, 3H);  $^{13}\text{C}$  NMR (100 MHz,  $\text{CDCl}_3$ ):  $\delta$  (ppm) 171.7, 156.0, 151.8, 143.7, 137.1, 134.6, 131.7, 128.9, 128.3, 128.1, 127.8, 126.9, 124.1, 123.9, 115.3, 113.8, 112.8, 110.2, 99.8, 94.4, 71.1, 69.2, 60.2, 56.7, 55.2, 44.5; ESI-HRMS: calcd. for  $\text{C}_{37}\text{H}_{29}\text{N}_3\text{O}_5 + \text{Na}^+$  618.1999, found 618.9998.

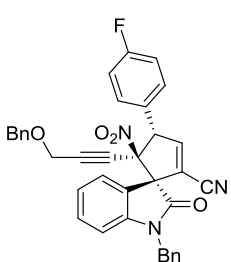

**3m**, white semisolid, 46.1 mg, 79% yield;  $[\alpha]_{\text{D}}^{20} = -154$  ( $c = 0.23$  in  $\text{CHCl}_3$ ); 72% ee, determined by HPLC analysis: [Daicel Chiralpak OD, *n*-hexane/*i*-PrOH = 60/40, 1.0 mL/min,  $\lambda = 254$  nm,  $t$  (minor) = 10.93 min,  $t$  (major) = 16.15 min];  $^1\text{H}$  NMR (400 MHz,  $\text{CDCl}_3$ ):  $\delta$  (ppm) 7.51-7.48 (m, 2H), 7.32-7.21 (m, 10H), 7.17-7.13 (m, 4H), 7.09-7.03 (m, 3H), 6.73 (d,  $J = 8.0$  Hz, 1H), 4.46 (d,  $J = 2.8$

Hz, 1H), 5.03 (d,  $J = 12.0$  Hz, 1H), 4.82 (d,  $J = 16.0$  Hz, 1H), 4.15, 4.08 (ABq,  $J = 11.6$  Hz, 2H), 3.90, 3.81 (ABq,  $J = 12.4$  Hz, 2H);  $^{13}\text{C}$  NMR (100 MHz,  $\text{CDCl}_3$ ):  $\delta$  (ppm) 171.6, 164.3, 161.8, 151.0, 143.7, 134.5, 132.3, 132.2, 131.8, 130.7, 129.0, 128.4, 128.0, 127.8, 126.9, 124.1, 123.9, 115.9, 115.6, 115.3, 112.6, 110.3, 99.5, 94.7, 71.2, 69.3, 60.1, 56.5, 44.5; ESI-HRMS: calcd. for  $\text{C}_{36}\text{H}_{26}\text{FN}_3\text{O}_4 + \text{Na}^+$  606.1800, found 606.1798.

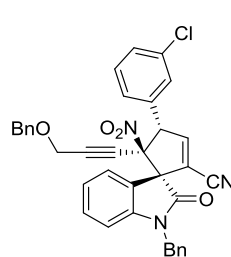

**3n**, white solid, 46.8 mg, 78% yield;  $[\alpha]_{\text{D}}^{20} = -91$  ( $c = 0.36$  in  $\text{CHCl}_3$ ); 87% ee, determined by HPLC analysis: [Daicel Chiralpak OD, *n*-hexane/*i*-PrOH = 60/40, 1.0 mL/min,  $\lambda = 254$  nm,  $t$  (major) = 16.38 min,  $t$  (minor) = 29.07 min];  $^1\text{H}$  NMR (400 MHz,  $\text{CDCl}_3$ ):  $\delta$  (ppm) 7.55 (s, 1H), 7.42-7.41 (m, 1H), 7.33-7.13 (m, 15H), 7.08 (t,  $J = 7.6$  Hz, 1H), 6.73 (d,  $J = 8.0$  Hz, 1H), 5.46 (d,  $J$



= 2.4 Hz, 1H), 5.04 (d,  $J = 16.0$  Hz, 1H), 4.82 (d,  $J = 16.0$  Hz, 1H), 4.10 (d,  $J = 2.4$  Hz, 2H), 3.93, 3.84 (ABq,  $J = 16.8$  Hz, 2H);  $^{13}\text{C}$  NMR (100 MHz,  $\text{CDCl}_3$ ):  $\delta$  (ppm) 171.4, 150.4, 143.7, 131.8, 130.6, 129.7, 129.1, 128.9, 128.6, 128.3, 128.1, 127.8, 126.8, 124.0, 123.9, 116.4, 112.5, 110.3, 99.4, 94.9, 71.2, 69.1, 60.1, 56.6, 44.5; ESI-HRMS: calcd. for  $\text{C}_{36}\text{H}_{26}\text{ClN}_3\text{O}_4 + \text{Na}^+$  622.1504, found 622.1503.

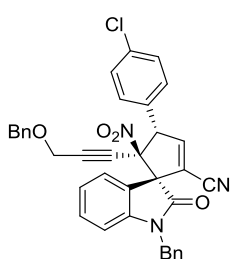

**3o**, white solid, 51.0 mg, 85% yield;  $[\alpha]_{\text{D}}^{20} = -202$  ( $c = 0.23$  in  $\text{CHCl}_3$ ); 74% ee, determined by HPLC analysis: [Daicel Chiralpak OD,  $n$ -hexane/ $i$ -PrOH = 60/40, 1.0 mL/min,  $\lambda = 254$  nm,  $t$  (minor) = 15.59 min,  $t$  (major) = 23.81 min];  $^1\text{H}$  NMR (400 MHz,  $\text{CDCl}_3$ ):  $\delta$  (ppm) 7.46 (d,  $J = 8.4$  Hz, 2H), 7.36-7.21 (m, 11H), 7.18-7.13 (m, 3H), 7.07 (t,  $J = 7.6$  Hz, 1H), 6.73 (d,  $J = 8.0$  Hz, 1H), 5.44 (d,  $J = 2.8$  Hz, 1H), 5.02 (d,  $J = 16.0$  Hz, 1H), 4.82 (d,  $J = 16.0$  Hz, 1H), 4.14, 4.06 (ABq,  $J = 12.0$  Hz, 2H), 3.91, 3.82 (ABq,  $J = 16.4$  Hz, 2H);  $^{13}\text{C}$  NMR (100 MHz,  $\text{CDCl}_3$ ):  $\delta$  (ppm) 171.6, 150.8, 143.7, 134.5, 131.9, 131.8, 128.9, 128.7, 128.4, 128.1, 127.8, 128.8, 126.8, 124.1, 124.0, 116.2, 112.5, 110.2, 99.3, 94.8, 71.2, 69.3, 60.1, 56.5, 44.5; ESI-HRMS: calcd. for  $\text{C}_{36}\text{H}_{26}\text{ClN}_3\text{O}_4 + \text{Na}^+$  622.1504, found 622.1508.

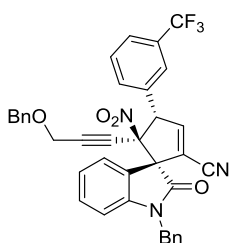

**3p**, colorless oil, 45.0 mg, 71% yield;  $[\alpha]_{\text{D}}^{20} = -210$  ( $c = 0.14$  in  $\text{CHCl}_3$ ); 79% ee, determined by HPLC analysis: [Daicel Chiralpak ID,  $n$ -hexane/ $i$ -PrOH = 60/40, 1.0 mL/min,  $\lambda = 254$  nm,  $t$  (minor) = 6.38 min,  $t$  (major) = 12.05 min];  $^1\text{H}$  NMR (400 MHz,  $\text{CDCl}_3$ ):  $\delta$  (ppm) 7.77 (d,  $J = 6.4$  Hz, 2H), 7.58 (d,  $J = 8.0$  Hz, 1H), 7.50 (t,  $J = 8.0$  Hz, 1H), 7.33-7.13 (m, 13H), 7.08 (t,  $J = 3.6$  Hz, 1H), 6.73 (d,  $J = 8.0$  Hz, 1H), 5.53 (d,  $J = 2.4$  Hz, 1H), 5.03 (d, 8.0 Hz, 1H), 4.82 (d,  $J = 8.0$  Hz, 1H), 4.05 (d,  $J = 3.6$  Hz, 2H), 3.84 (d,  $J = 4.4$  Hz, 2H);  $^{13}\text{C}$  NMR (100 MHz,  $\text{CDCl}_3$ ):  $\delta$  (ppm) 171.0, 150.0, 143.6, 134.3, 133.8, 131.8, 129.0, 128.9, 128.3, 128.3, 127.9, 127.8, 127.8, 126.8, 123.9, 123.9, 116.7, 112.2, 110.3, 99.0, 95.0, 71.1, 69.1, 60.1, 56.4, 44.4; ESI-HRMS: calcd. for  $\text{C}_{36}\text{H}_{26}\text{F}_3\text{N}_3\text{O}_4 + \text{Na}^+$  656.1768, found 656.1765.

**3q**, white solid, 52.3 mg, 85% yield;  $[\alpha]_{\text{D}}^{20} = -75$  ( $c = 0.23$  in  $\text{CHCl}_3$ ); 90% ee, determined by HPLC analysis: [Daicel Chiralpak AD,  $n$ -hexane/ $i$ -PrOH = 60/40, 1.0 mL/min,  $\lambda = 254$  nm,  $t$  (minor) = 9.70 min,  $t$  (major) = 21.99 min];  $^1\text{H}$  NMR (400 MHz,  $\text{CDCl}_3$ ):  $\delta$  (ppm) 7.92 (d,  $J = 6.8$  Hz, 1H),

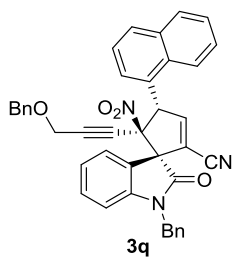

7.83 (dd,  $J = 7.6$  Hz, 3.2 Hz, 2H), 7.68 (d,  $J = 8.4$  Hz, 1H), 7.58-7.52 (m, 2H), 7.47 (t,  $J = 7.2$  Hz, 1H), 7.41 (d,  $J = 2.8$  Hz, 1H), 7.34 (dt,  $J = 7.6$  Hz, 0.8 Hz, 1H), 7.23-7.18 (m, 10 Hz), 7.13 (dt,  $J = 7.6$  Hz, 0.8 Hz, 1H), 6.93-6.91 (m, 1H), 6.74 (d,  $J = 8.0$  Hz, 1H), 6.18 (d,  $J = 2.8$  Hz, 1H), 4.99 (d, 16.0 Hz, 1H), 4.74 (d,  $J = 16.0$  Hz, 1H), 3.42-3.35 (m, 4H);  $^{13}\text{C}$  NMR (100 MHz,  $\text{CDCl}_3$ ):  $\delta$  (ppm)

172.3, 152.6, 144.0, 136.9, 129.6, 129.3, 128.9, 128.1, 128.1, 127.7, 126.9, 125.9, 125.3, 124.3, 124.3, 115.6, 112.7, 110.1, 98.9, 93.1, 70.7, 70.5, 57.7, 56.0, 44.5; ESI-HRMS: calcd. for  $\text{C}_{40}\text{H}_{29}\text{N}_3\text{O}_4 + \text{Na}^+$  638.2050, found 638.2090.

Enantiomer of **3q**, white solid, 40.0 mg, 65% yield;  $[\alpha]_{\text{D}}^{20} = 72$  ( $c = 0.12$  in  $\text{CHCl}_3$ ); -90% ee, determined by HPLC analysis: [Daicel Chiralpak AD,  $n$ -hexane/ $i$ -PrOH = 60/40, 1.0 mL/min,  $\lambda = 254$  nm,  $t$  (major) = 9.42 min,  $t$  (minor) = 21.52 min].

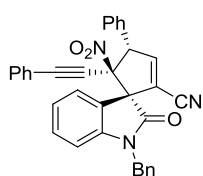

**3r**, white solid, 43.8 mg, 84% yield;  $[\alpha]_{\text{D}}^{20} = -326$  ( $c = 0.62$  in  $\text{CHCl}_3$ ); 88% ee, determined by HPLC analysis [Daicel Chiralpak OD,  $n$ -hexane/ $i$ -PrOH = 60/40, 1.0 mL/min,  $\lambda = 254$  nm,  $t$  (major) = 12.35 min,  $t$  (minor) = 21.09 min];  $^1\text{H}$  NMR (400 MHz,  $\text{CDCl}_3$ ):  $\delta$  (ppm) 7.54-7.55 (m, 2H), 7.42-7.41 (m, 3H), 7.31-7.05 (m, 11H), 7.07 (t,  $J = 8.0$  Hz, 1H), 6.95 (d,  $J = 7.2$  Hz, 2H), 6.73 (d,  $J = 8.0$  Hz, 1H), 5.61 (d,  $J = 2.4$  Hz, 1H), 5.15 (d,  $J = 15.6$  Hz, 1H), 4.77 (d,  $J = 16.0$  Hz, 1H);  $^{13}\text{C}$  NMR (100 MHz,  $\text{CDCl}_3$ ):  $\delta$  (ppm)

171.4, 151.3, 143.7, 134.7, 132.0, 131.6, 130.4, 129.6, 128.9, 128.7, 128.4, 128.1, 127.7, 127.1, 124.1, 123.7, 115.9, 112.8, 110.2, 100.5, 97.6, 79.2, 69.0, 60.6, 44.6; ESI-HRMS: calcd. for  $\text{C}_{34}\text{H}_{23}\text{N}_3\text{O}_3 + \text{Na}^+$  544.1632, found 544.1624.

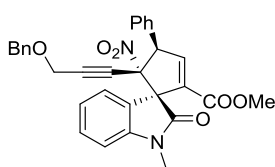

**3s**, white solid, 28.3 mg, 54% yield;  $[\alpha]_{\text{D}}^{20} = 327$  ( $c = 0.52$  in  $\text{CHCl}_3$ ); -98% ee, determined by HPLC analysis: [Daicel Chiralpak ID,  $n$ -hexane/ $i$ -PrOH = 60/40, 1.0 mL/min,  $\lambda = 254$  nm,  $t$  (major) = 8.89 min,  $t$  (minor) = 11.55 min];  $^1\text{H}$  NMR (400 MHz,  $\text{CDCl}_3$ ):  $\delta$  (ppm) 7.50 (d,  $J =$

7.2 Hz, 2H), 7.38-7.22 (m, 10H), 7.10 (d,  $J = 6.8$  Hz, 1H), 7.02 (t,  $J = 7.2$  Hz, 1H), 6.86 (d,  $J = 8.0$  Hz, 1H), 5.61 (d,  $J = 2.0$  Hz, 1H), 4.24, 4.16 (ABq,  $J = 5.2$  Hz, 2H), 3.98 (d,  $J = 1.2$  Hz, 2H), 3.64 (s, 3H), 3.27 (s, 3H);  $^{13}\text{C}$  NMR (100 MHz,  $\text{CDCl}_3$ ):  $\delta$  (ppm) 172.6, 162.0, 145.9, 144.6, 137.2, 135.7, 135.4, 130.6, 130.2, 128.5, 128.3, 128.2, 127.8, 125.1, 123.2, 122.7, 108.6, 100.8, 93.7, 71.0, 66.9, 58.4, 56.6, 52.2, 26.9; ESI-HRMS: calcd. for  $\text{C}_{37}\text{H}_{30}\text{N}_2\text{O}_6 + \text{Na}^+$  545.1683, found 545.1683.

#### 4. Synthetic transformations of product **3r**

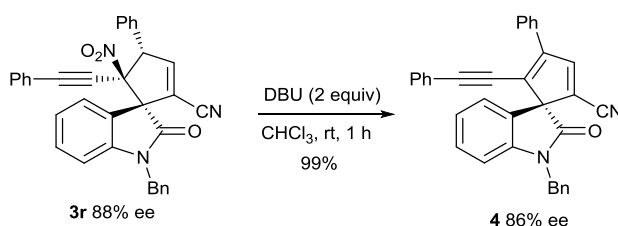

To a stirred solution of **3r** (26 mg, 0.05 mmol) in 1 mL of  $\text{CHCl}_3$  was added DBU (0.1 mmol) at room temperature. The mixture was stirred until **3r** was consumed (1 h). Then evaporation of solvent under reduced pressure followed by purification by silica gel column chromatography using EtOAc/petroleum ether (1:8) afforded the compound **4** in a quantitative yield (99%). light yellow oil, 23.7 mg, 99% yield;  $[\alpha]_{\text{D}}^{20} = 20$  ( $c = 0.12$  in EtOAc); 86% ee, determined by HPLC analysis: [Daicel Chiralpak ID, *n*-hexane/*i*-PrOH = 60/40, 1.0 mL/min,  $\lambda = 254$  nm,  $t$  (major) = 14.78 min,  $t$  (minor) = 29.86 min];  $^1\text{H}$  NMR (400 MHz,  $\text{CDCl}_3$ ):  $\delta$  (ppm) 7.98 (d,  $J = 7.2$  Hz, 2H), 7.90 (s, 1H), 7.49 (t,  $J = 7.2$  Hz, 2H), 7.43 (t,  $J = 7.2$  Hz, 1H), 7.37 (d,  $J = 7.2$  Hz, 2H), 7.32-7.27 (m, 2H), 7.22 (t,  $J = 7.2$  Hz, 2H), 7.15 (t,  $J = 7.2$  Hz, 1H), 7.10-7.01 (m, 6H), 6.85 (d,  $J = 8.0$  Hz, 1H), 5.30 (d,  $J = 15.6$  Hz, 1H), 4.78 (d,  $J = 16.0$  Hz, 1H);  $^{13}\text{C}$  NMR (100 MHz,  $\text{CDCl}_3$ ):  $\delta$  (ppm) 169.6, 150.3, 147.1, 144.2, 131.8, 130.1, 129.7, 129.2, 128.9, 128.8, 128.4, 127.7, 127.4, 127.1, 124.1, 123.7, 117.8, 114.1, 110.2, 102.4, 83.8, 73.3, 44.7; ESI-HRMS: calcd. for  $\text{C}_{34}\text{H}_{22}\text{N}_2\text{O} + \text{Na}^+$  497.1624, found 497.1628.

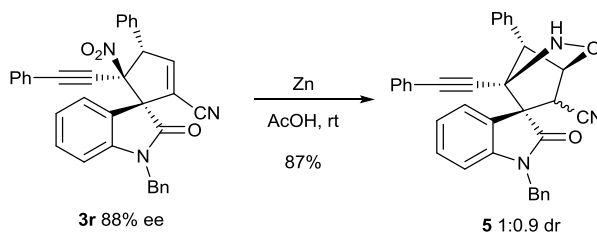

To a stirred suspension of product **3r** (70 mg, 0.13 mmol) in  $\text{CH}_3\text{COOH}$  (1 mL) was added Zn dust (87 mg, 1.3 mmol, 10 equiv) in one portion at room temperature. The mixture was stirred for 1.5 hours. Upon completion, the mixture was diluted by EtOAc and saturated  $\text{NaHCO}_3$  was added carefully. The aqueous layer was extracted with EtOAc. The combined organic layers were dried over  $\text{Na}_2\text{SO}_4$  and concentrated under vacuum. The residue was purified by column chromatography (petroleum ether/EtOAc = 4:1) to afford bridged heterocycle **5** as a diastereomeric mixture (59.1 mg, 87% yield). 1:0.9 dr, determined by  $^1\text{H}$  NMR analysis. The diastereomeric mixture could not be isolated very well on a chiral column by HPLC analysis, the enantioselectivity almost remained unchanged compared with **3r**. 86% ee, determined by HPLC analysis: [Daicel Chiralpak ID,

*n*-hexane/*i*-PrOH = 70/30, 1.0 mL/min,  $\lambda$  = 254 nm,  $t_1$  (major) = 9.66 min,  $t_1$  (minor) = 14.62 min]; 86% ee, determined by HPLC analysis: [ $t_2$  (minor) = 20.47 min,  $t_2$  (major) = 32.43 min];  $^1\text{H}$  NMR (400 MHz,  $\text{CDCl}_3$ ):  $\delta$  (ppm) 9.37-9.16 (m, 1.66H), 7.50-7.28 (m, 33.91H), 7.22-7.14 (m, 5.93H), 7.00 (t,  $J$  = 7.6 Hz, 1.81H), 6.91 (t,  $J$  = 7.6 Hz, 1.18H), 6.70 (t,  $J$  = 7.6 Hz, 2.40H), 6.57 (d,  $J$  = 7.2 Hz, 0.93H), 5.25 (d,  $J$  = 9.6 Hz, 1.11H), 5.12 (d,  $J$  = 8.8 Hz, 1.00H), 5.03 (d,  $J$  = 6.4 Hz, 1.08H), 4.99 (d,  $J$  = 6.0 Hz, 1.33H), 4.88- 4.78 (m, 4.49H), 4.67 (s, 0.96H);  $^{13}\text{C}$  NMR (100 MHz,  $\text{CDCl}_3$ ):  $\delta$  (ppm) 173.1, 172.9, 149.7, 149.5, 143.4, 143.4, 142.8, 142.2, 138.4, 136.8, 134.9, 132.2, 132.1, 123.0, 129.8, 129.5, 129.3, 129.0, 128.9, 128.8, 128.4, 128.4, 128.3, 128.2, 128.1, 128.0, 127.8, 127.2, 127.2, 124.9, 124.6, 124.5, 124.4, 123.5, 123.3, 121.1, 120.9, 116.7, 116.7, 112.6, 112.4, 109.8, 103.2, 102.8, 78.6, 78.5, 49.2, 48.7, 46.3, 46.1, 44.3; ESI-HRMS: calcd. for  $\text{C}_{34}\text{H}_{25}\text{N}_3\text{O}_2+\text{Na}^+$  530.1839, found 530.1847.

## 5. Crystal data and structure refinement for enantiopure **3s**

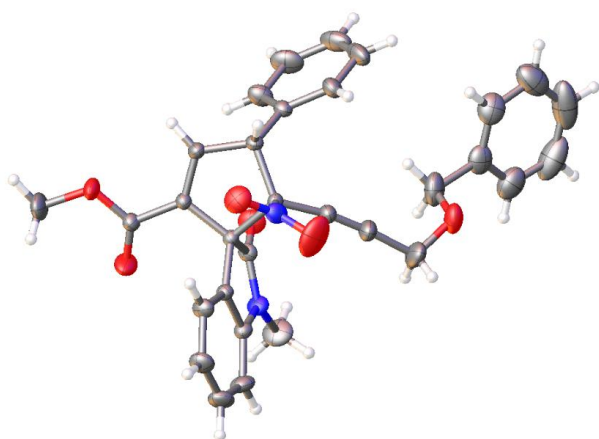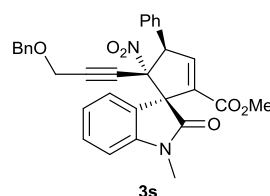

|                                             |                                                               |
|---------------------------------------------|---------------------------------------------------------------|
| Identification code                         | <b>3s</b>                                                     |
| Empirical formula                           | C <sub>31</sub> H <sub>26</sub> N <sub>2</sub> O <sub>6</sub> |
| Formula weight                              | 521.53                                                        |
| Temperature/K                               | 293(2)                                                        |
| Crystal system                              | orthorhombic                                                  |
| Space group                                 | P2 <sub>1</sub> 2 <sub>1</sub> 2 <sub>1</sub>                 |
| a/Å                                         | 9.02156(13)                                                   |
| b/Å                                         | 9.44417(11)                                                   |
| c/Å                                         | 30.9480(4)                                                    |
| α/°                                         | 90                                                            |
| β/°                                         | 90                                                            |
| γ/°                                         | 90                                                            |
| Volume/Å <sup>3</sup>                       | 2636.81(6)                                                    |
| Z                                           | 4                                                             |
| ρ <sub>calc</sub> /cm <sup>3</sup>          | 1.314                                                         |
| μ/mm <sup>-1</sup>                          | 0.754                                                         |
| F(000)                                      | 1092.0                                                        |
| Crystal size/mm <sup>3</sup>                | 0.14 × 0.13 × 0.13                                            |
| Radiation                                   | CuKα (λ = 1.54184)                                            |
| 2θ range for data collection/°              | 9.792 to 142.754                                              |
| Index ranges                                | -7 ≤ h ≤ 10, -11 ≤ k ≤ 11, -33 ≤ l ≤ 37                       |
| Reflections collected                       | 13769                                                         |
| Independent reflections                     | 4592 [R <sub>int</sub> = 0.0290, R <sub>sigma</sub> = 0.0224] |
| Data/restraints/parameters                  | 4592/0/354                                                    |
| Goodness-of-fit on F <sup>2</sup>           | 1.055                                                         |
| Final R indexes [I ≥ 2σ (I)]                | R <sub>1</sub> = 0.0494, wR <sub>2</sub> = 0.1341             |
| Final R indexes [all data]                  | R <sub>1</sub> = 0.0498, wR <sub>2</sub> = 0.1347             |
| Largest diff. peak/hole / e Å <sup>-3</sup> | 0.47/-0.28                                                    |
| Flack parameter                             | -0.09(10)                                                     |

## 6. NMR spectra and HPLC chromatograms

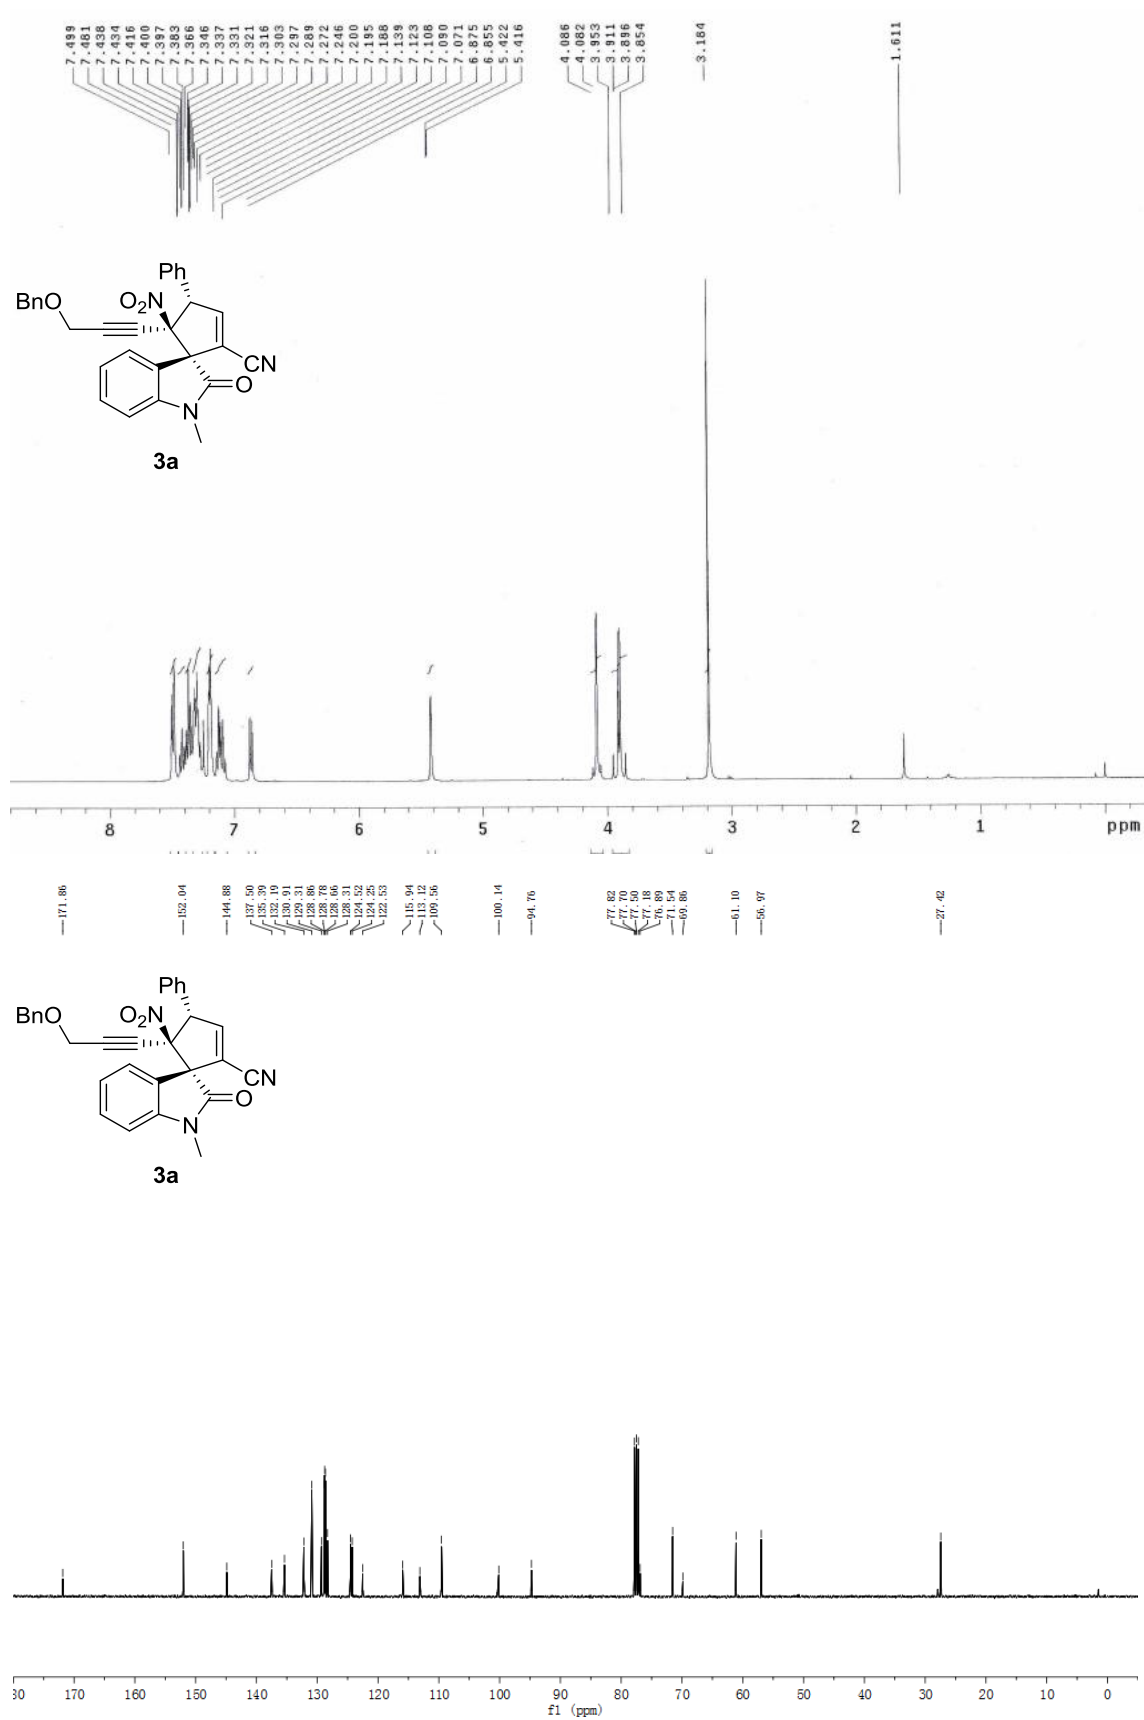

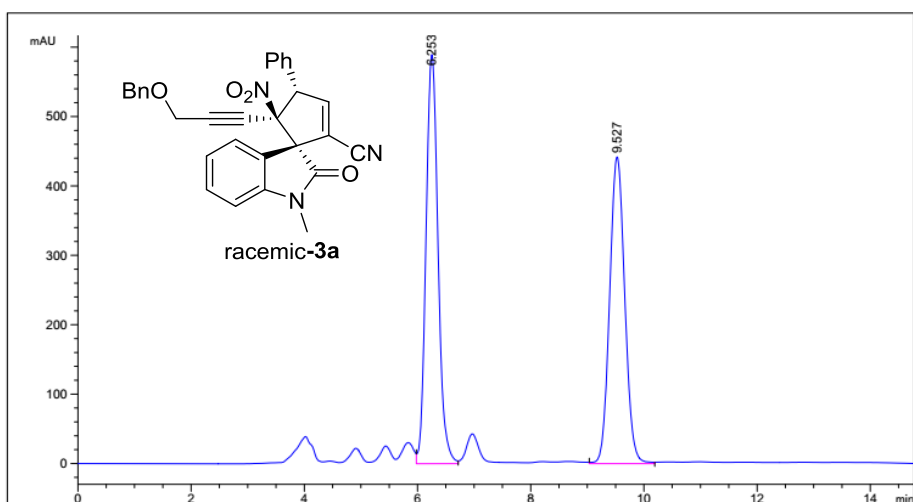

| Peak # | RetTime [min] | Type | Width [min] | Area mAU   | *s | Height [mAU] | Area %  |
|--------|---------------|------|-------------|------------|----|--------------|---------|
| 1      | 6.253         | VV   | 0.2303      | 8677.76953 |    | 588.50793    | 51.4421 |
| 2      | 9.527         | VV   | 0.2922      | 8191.22119 |    | 441.50714    | 48.5579 |

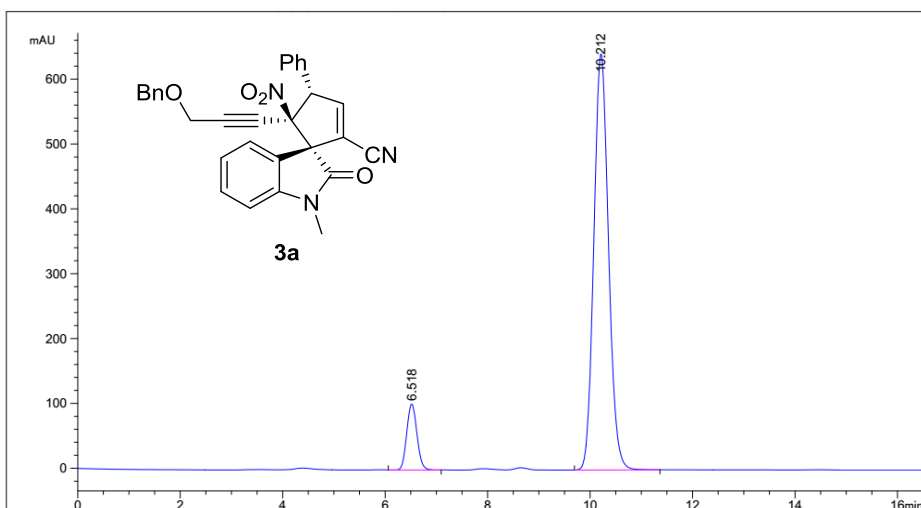

| Peak # | RetTime [min] | Type | Width [min] | Area mAU   | *s | Height [mAU] | Area %  |
|--------|---------------|------|-------------|------------|----|--------------|---------|
| 1      | 6.518         | VB   | 0.2205      | 1411.11707 |    | 101.48647    | 9.9642  |
| 2      | 10.212        | BB   | 0.3136      | 1.27507e4  |    | 640.98602    | 90.0358 |

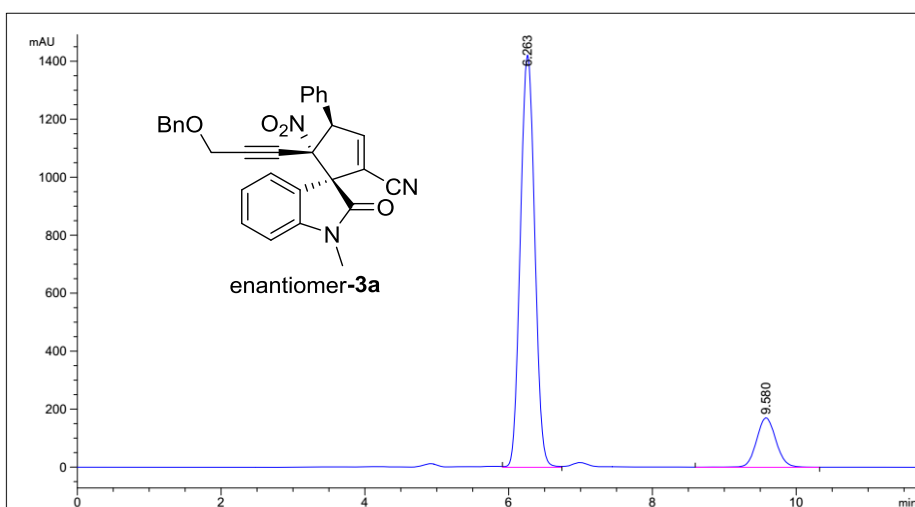

| Peak # | RetTime [min] | Type | Width [min] | Area mAU   | *s | Height [mAU] | Area %  |
|--------|---------------|------|-------------|------------|----|--------------|---------|
| 1      | 6.263         | VV   | 0.2207      | 1.97651e4  |    | 1419.51978   | 86.0286 |
| 2      | 9.680         | VV   | 0.2957      | 3209.94116 |    | 170.23338    | 13.9714 |

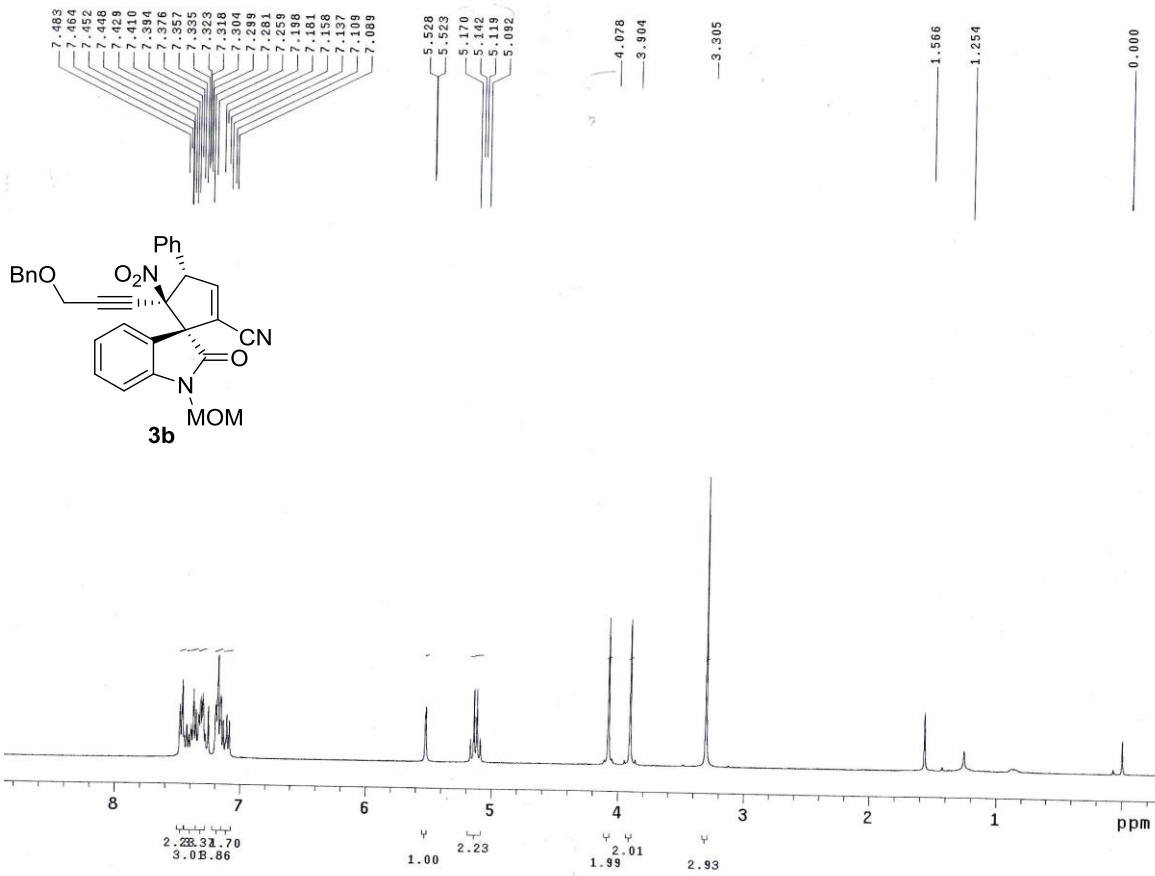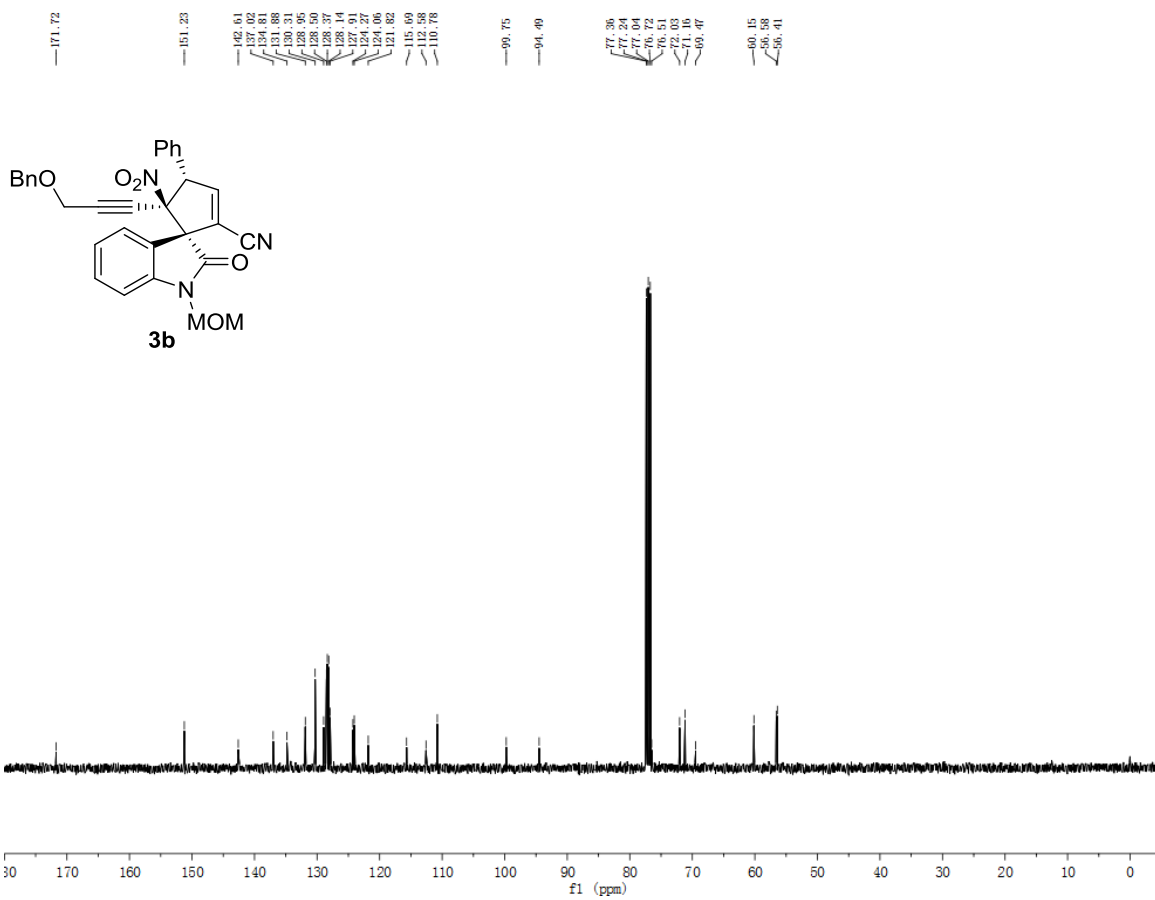



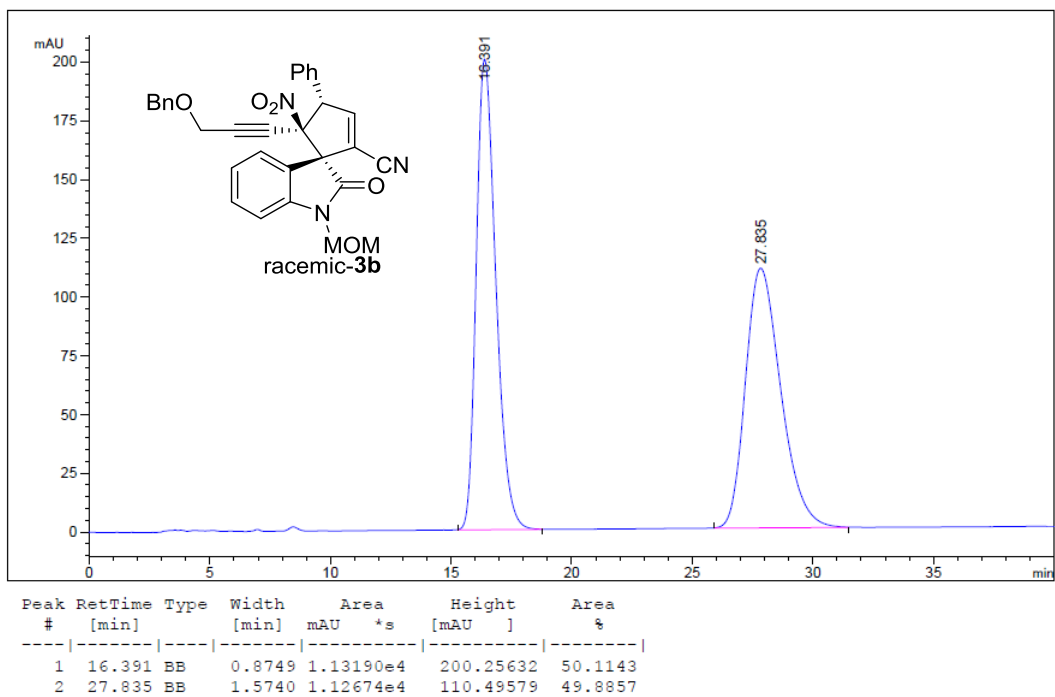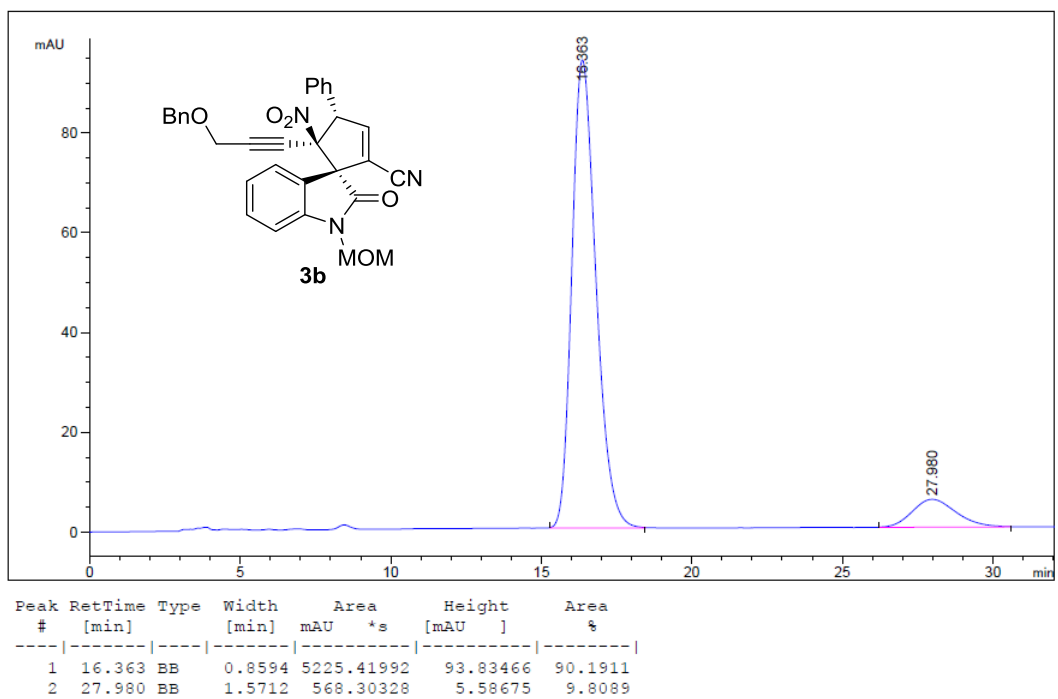

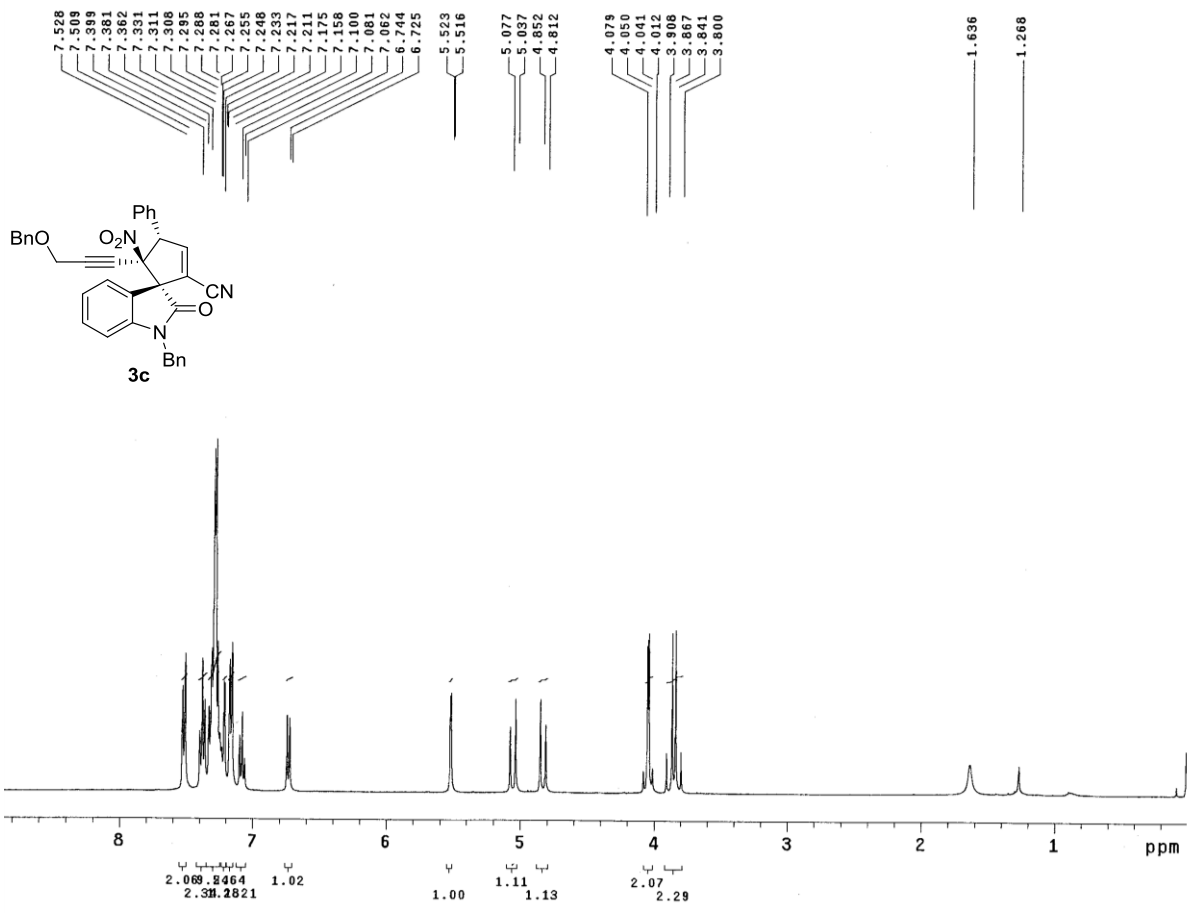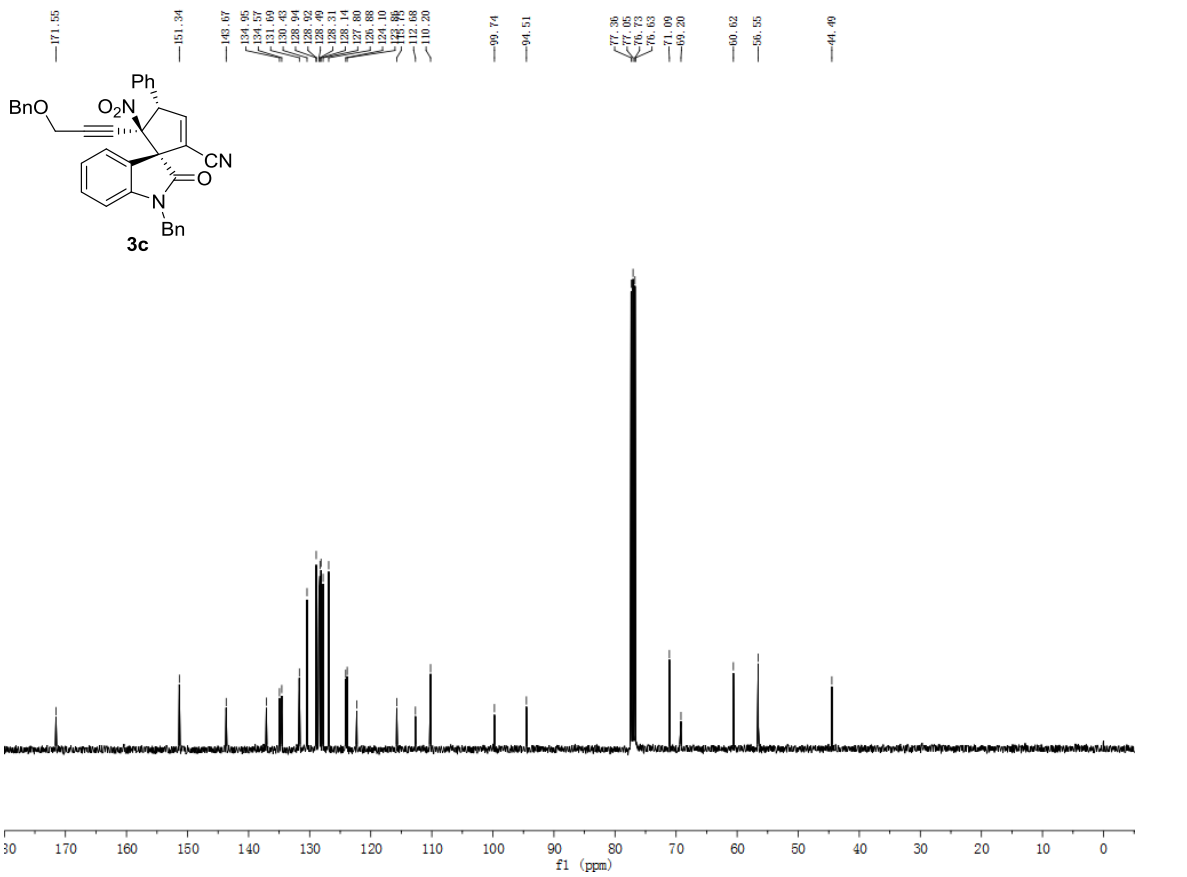

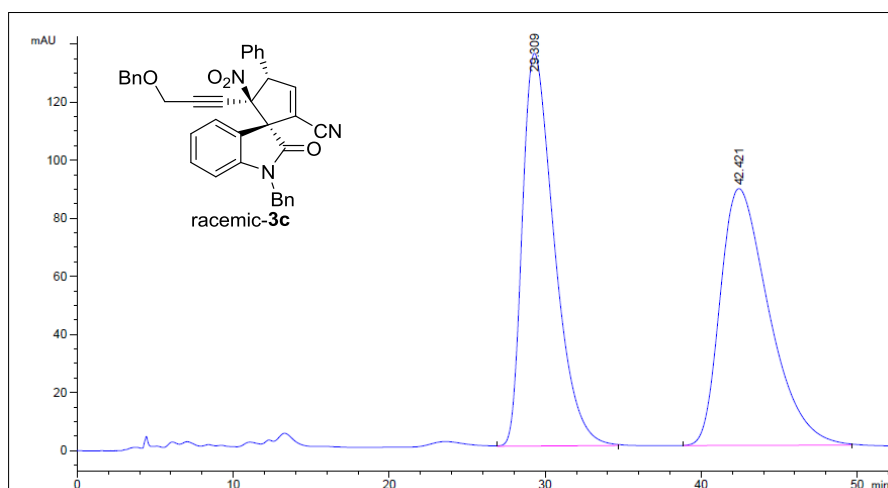

| Peak # | RetTime [min] | Type | Width [min] | Area mAU  | Area *s | Height [mAU] | Area %  |
|--------|---------------|------|-------------|-----------|---------|--------------|---------|
| 1      | 29.309        | BB   | 2.1826      | 1.92209e4 |         | 135.21243    | 50.0011 |
| 2      | 42.421        | BB   | 3.3225      | 1.92200e4 |         | 88.41209     | 49.9989 |

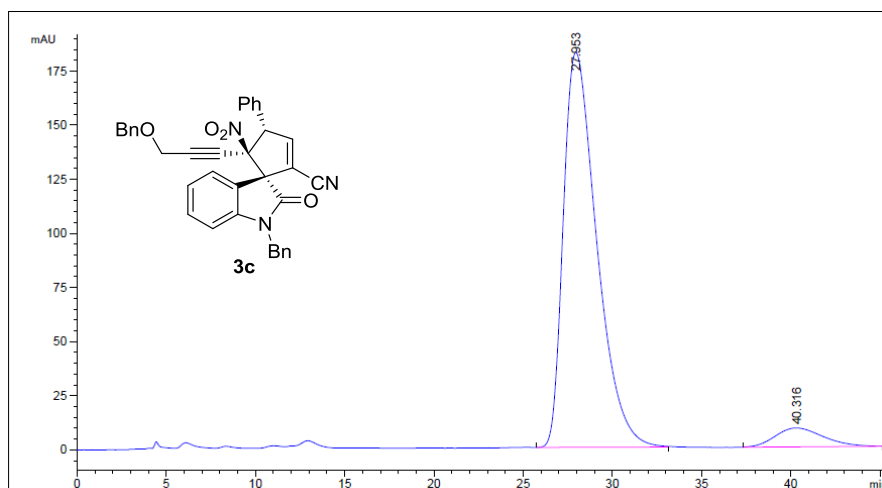

| Peak # | RetTime [min] | Type | Width [min] | Area mAU   | Area *s | Height [mAU] | Area %  |
|--------|---------------|------|-------------|------------|---------|--------------|---------|
| 1      | 27.953        | BB   | 1.9889      | 2.37326e4  |         | 182.49559    | 93.5484 |
| 2      | 40.316        | BB   | 2.8205      | 1636.72607 |         | 8.73638      | 6.4516  |

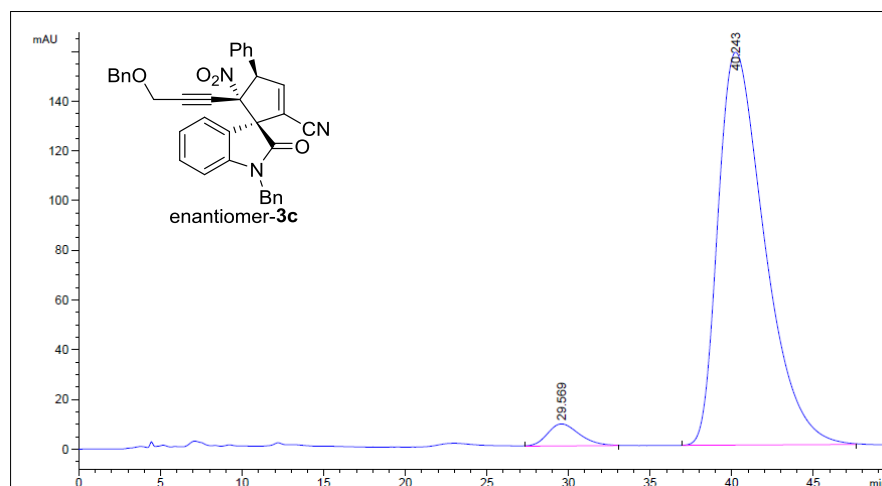

| Peak # | RetTime [min] | Type | Width [min] | Area mAU   | Area *s | Height [mAU] | Area %  |
|--------|---------------|------|-------------|------------|---------|--------------|---------|
| 1      | 29.569        | BB   | 2.0955      | 1213.23425 |         | 8.87603      | 3.7235  |
| 2      | 40.243        | BB   | 3.0266      | 3.13698e4  |         | 158.02118    | 96.2765 |

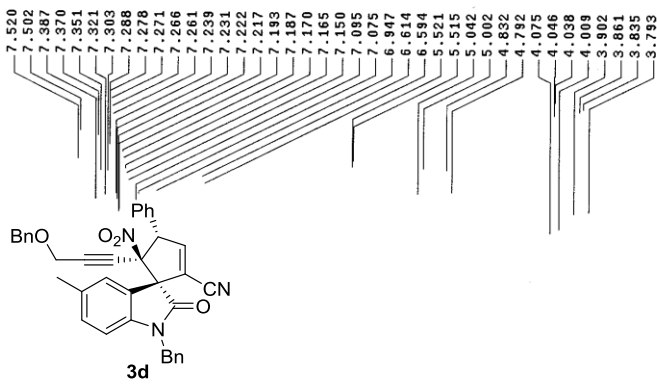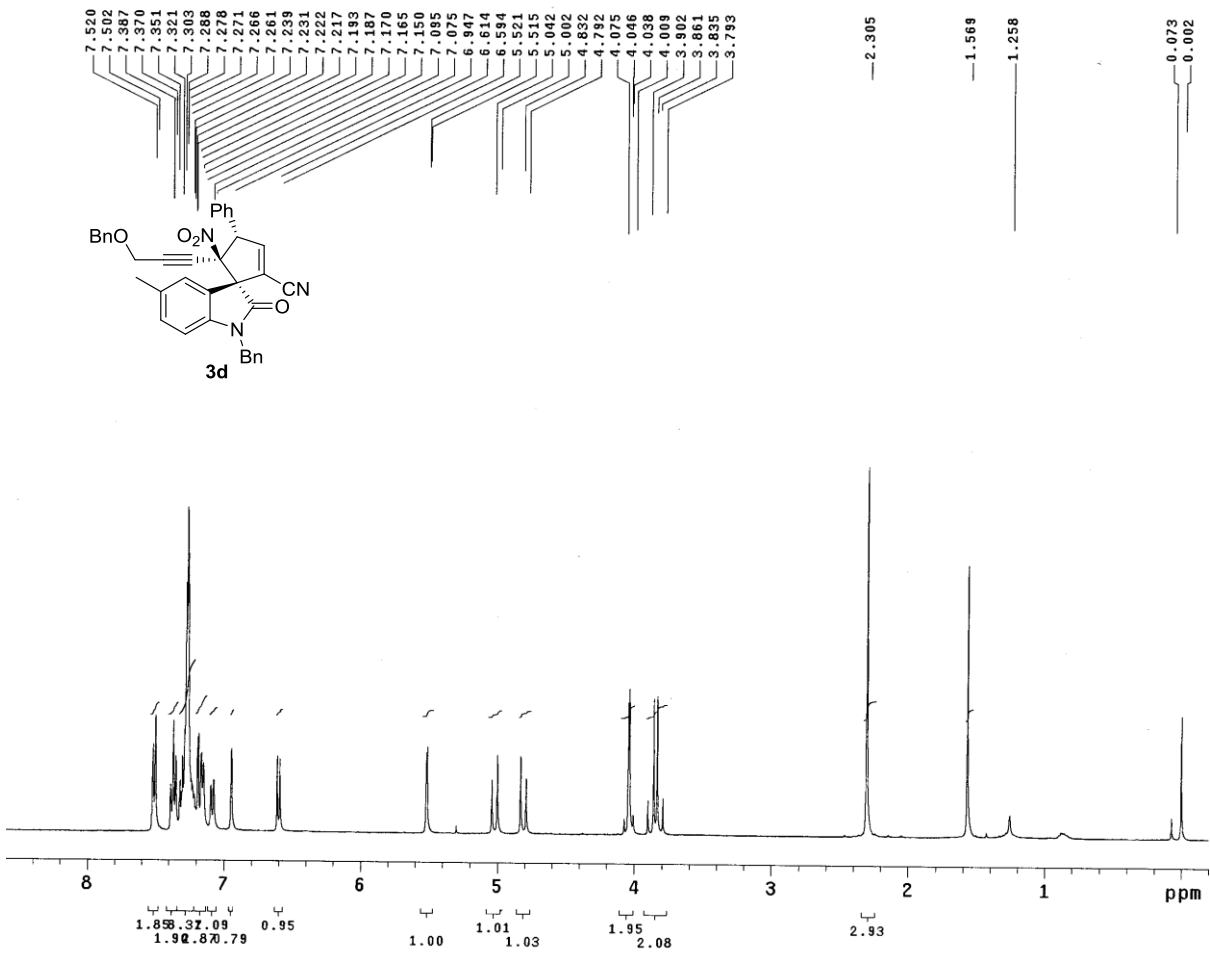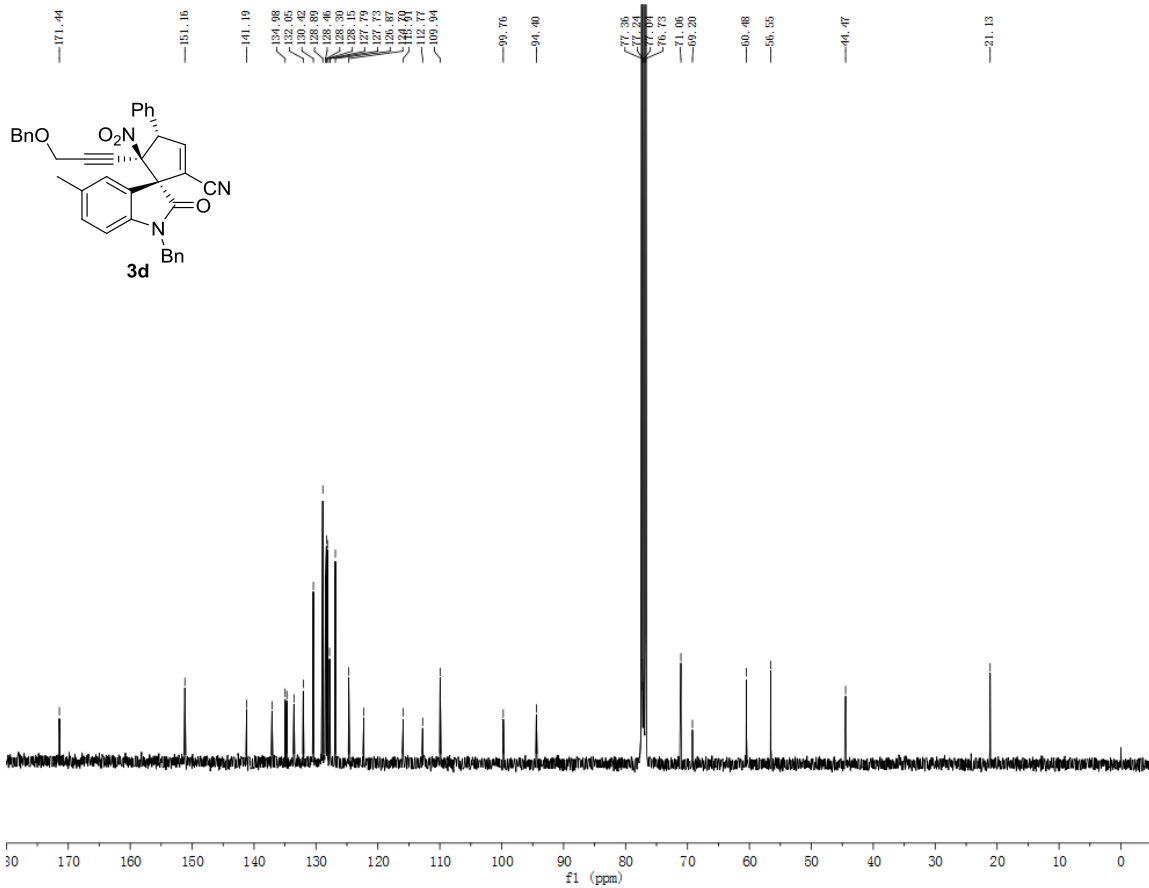

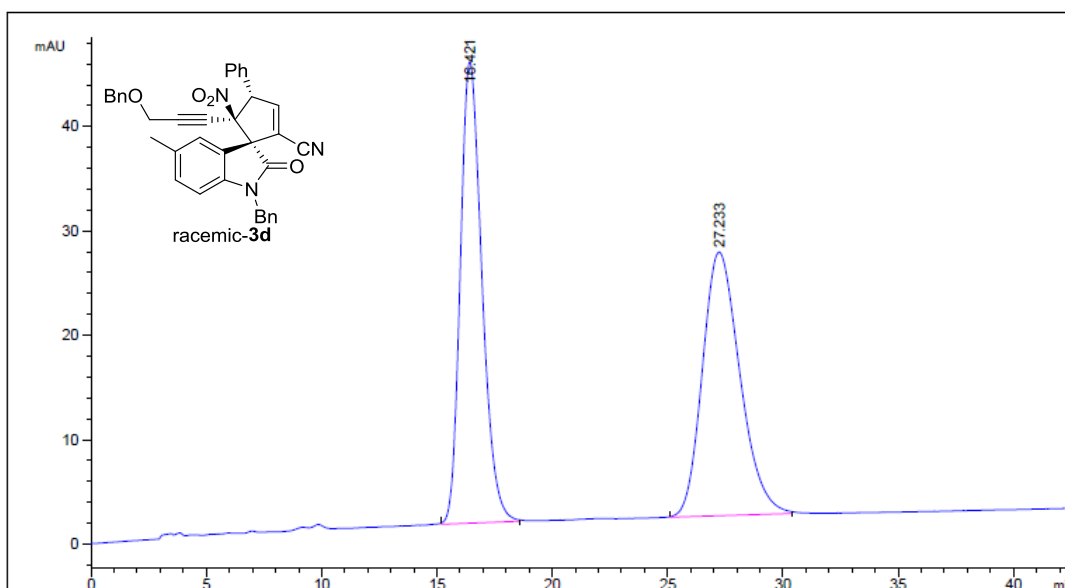

| Peak # | RetTime [min] | Type | Width [min] | Area mAU   | Area %  | Height [mAU] |
|--------|---------------|------|-------------|------------|---------|--------------|
| 1      | 16.421        | BB   | 1.0033      | 2873.47290 | 50.1545 | 44.18745     |
| 2      | 27.233        | BB   | 1.7559      | 2855.76685 | 49.8455 | 25.25754     |

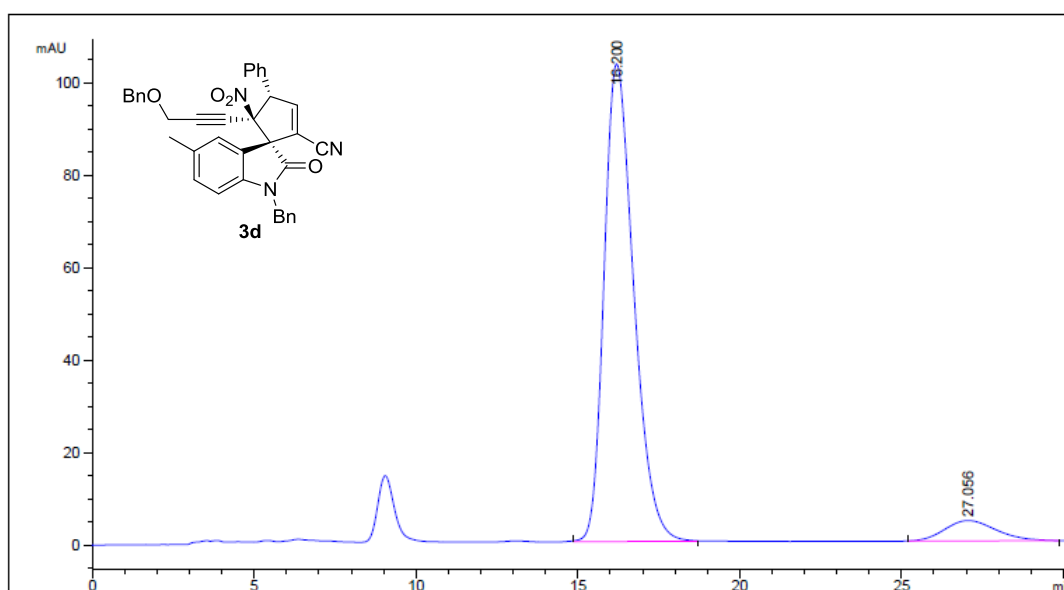

| Peak # | RetTime [min] | Type | Width [min] | Area mAU   | Area %  | Height [mAU] |
|--------|---------------|------|-------------|------------|---------|--------------|
| 1      | 16.200        | BB   | 0.9815      | 6576.28027 | 93.0683 | 103.29659    |
| 2      | 27.056        | BB   | 1.7097      | 489.79822  | 6.9317  | 4.40845      |

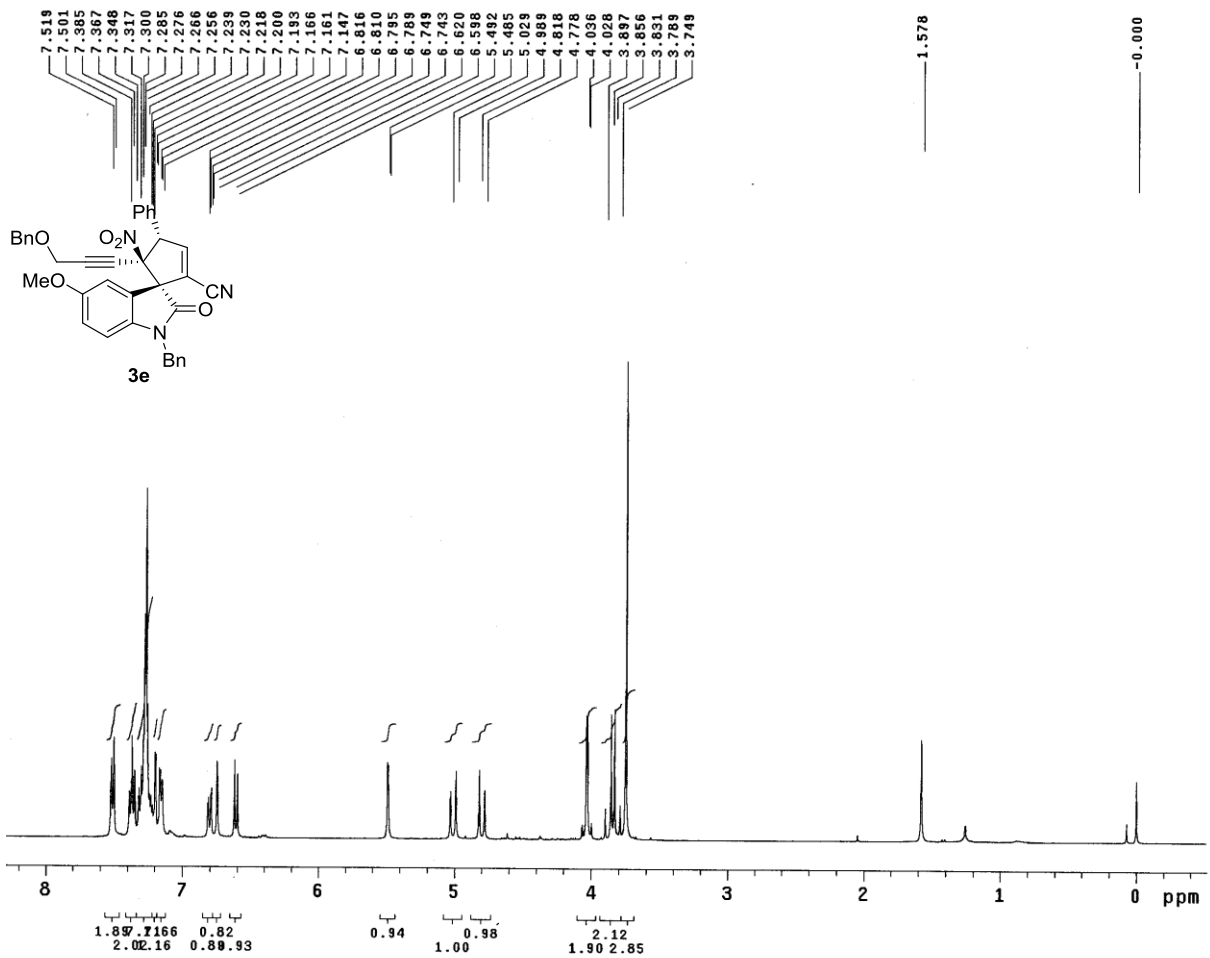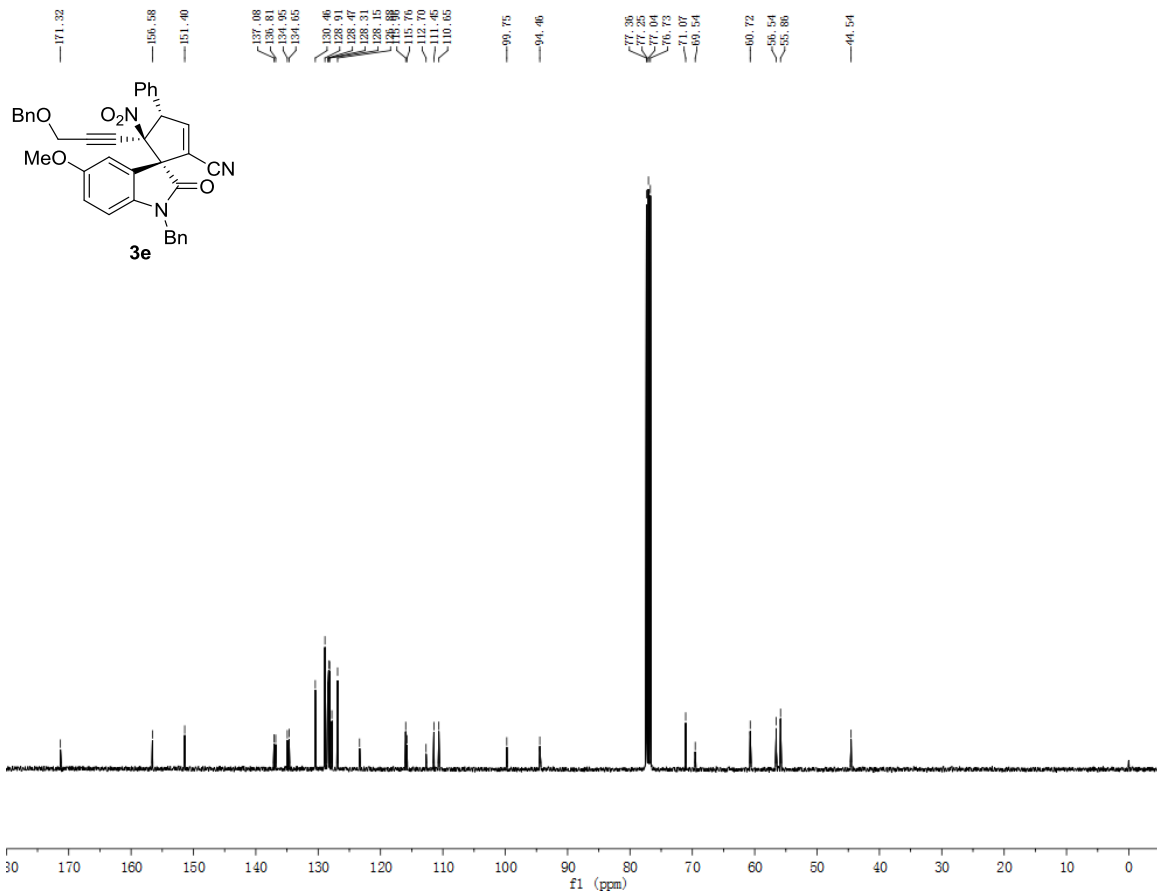

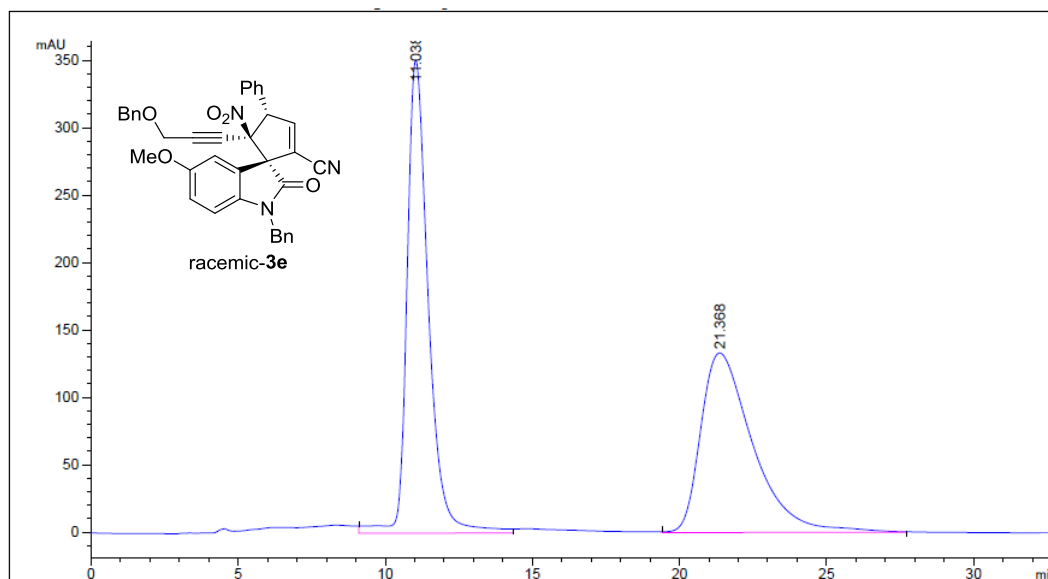

| Peak # | RetTime [min] | Type | Width [min] | Area mAU  | Area %  | Height [mAU] | Area %  |
|--------|---------------|------|-------------|-----------|---------|--------------|---------|
| 1      | 11.038        | VB   | 0.7676      | 1.78317e4 | 52.0892 | 350.88116    | 52.0892 |
| 2      | 21.368        | BB   | 1.8676      | 1.64013e4 | 47.9108 | 133.19142    | 47.9108 |

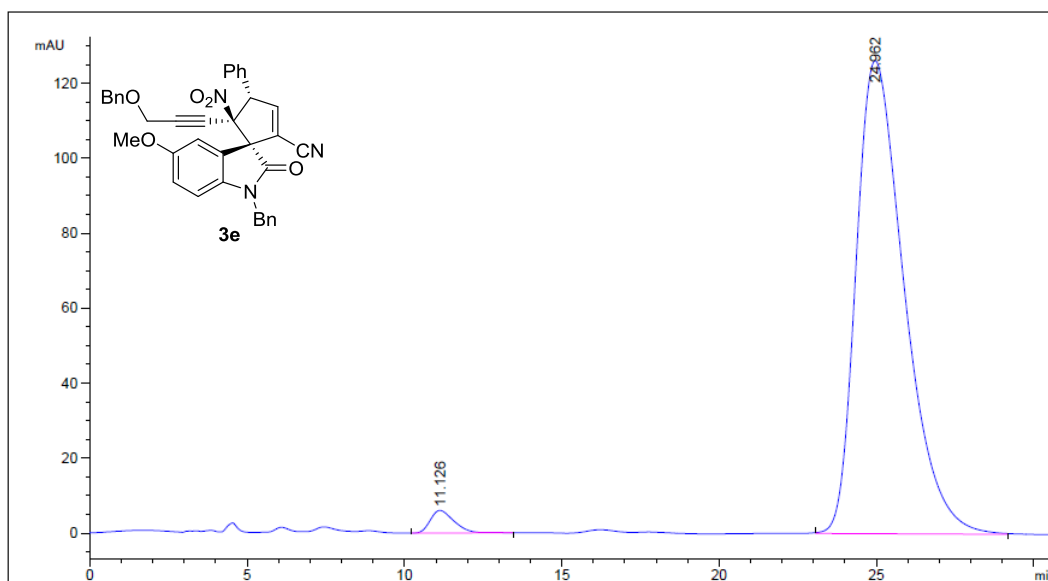

| Peak # | RetTime [min] | Type | Width [min] | Area mAU  | Area %  | Height [mAU] | Area %  |
|--------|---------------|------|-------------|-----------|---------|--------------|---------|
| 1      | 11.126        | VB   | 0.8008      | 317.86523 | 2.3134  | 6.03598      | 2.3134  |
| 2      | 24.962        | BB   | 1.6371      | 1.34221e4 | 97.6866 | 126.17245    | 97.6866 |

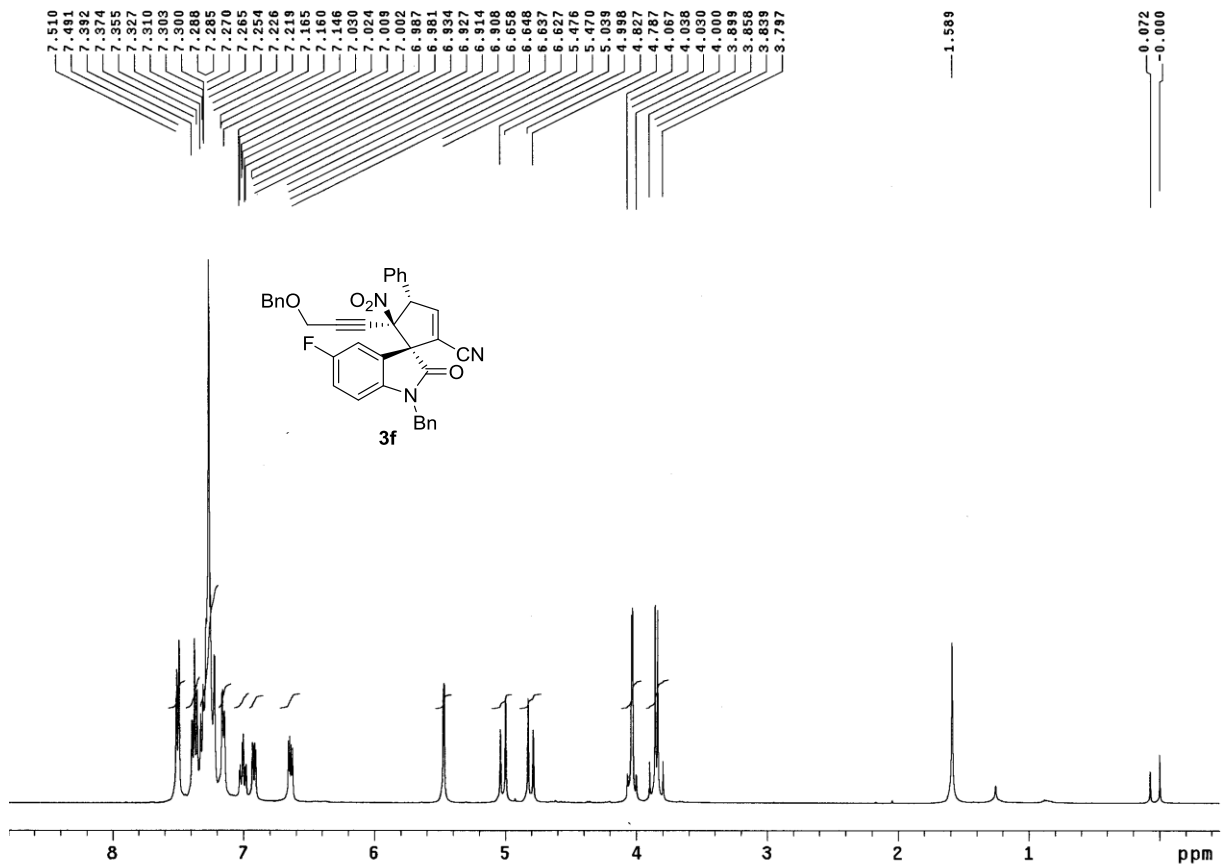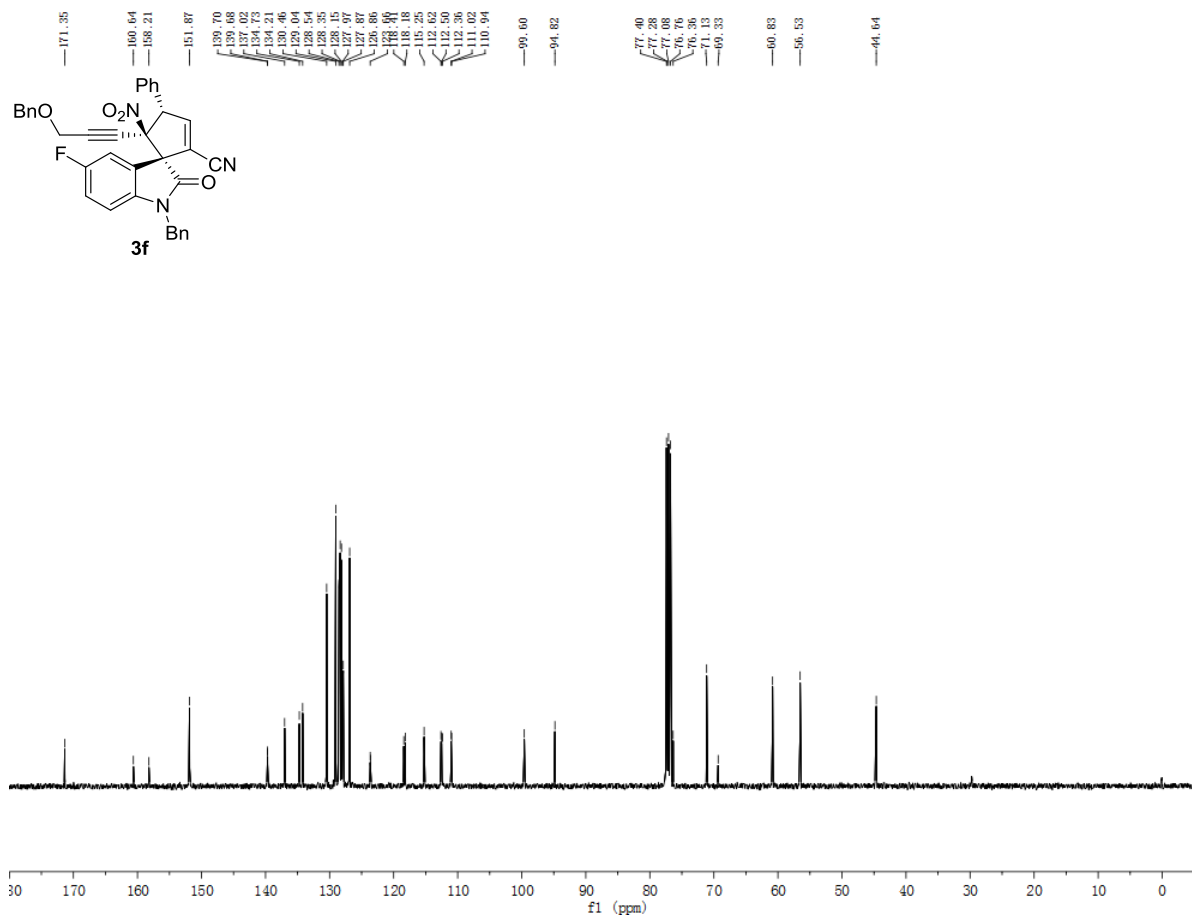



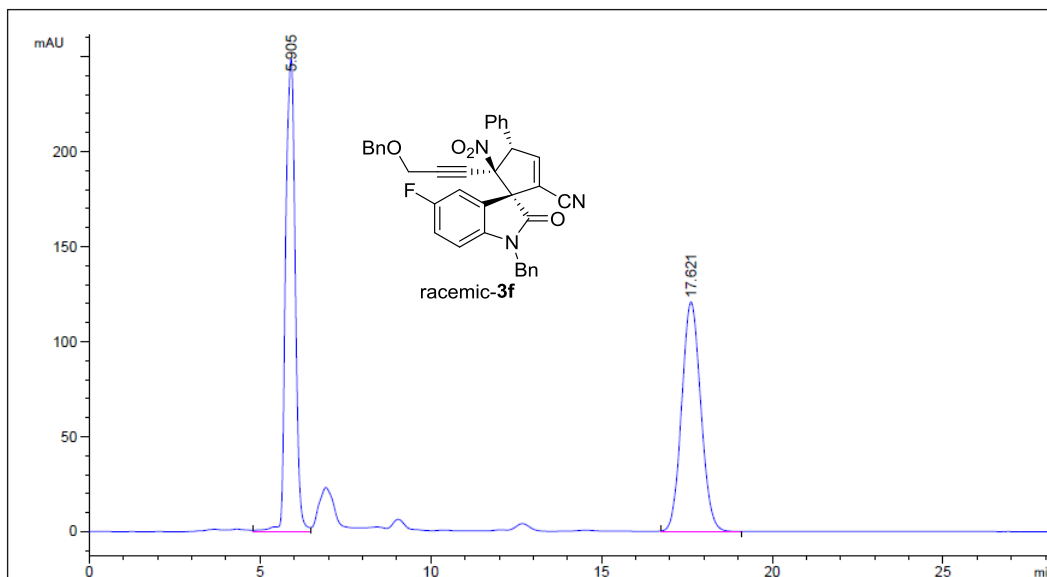

| Peak # | RetTime [min] | Type | Width [min] | Area mAU   | *s | Height [mAU] | Area %  |
|--------|---------------|------|-------------|------------|----|--------------|---------|
| 1      | 5.905         | VV   | 0.3155      | 4870.72900 |    | 249.04913    | 50.8625 |
| 2      | 17.621        | BB   | 0.6060      | 4705.53467 |    | 120.77073    | 49.1375 |

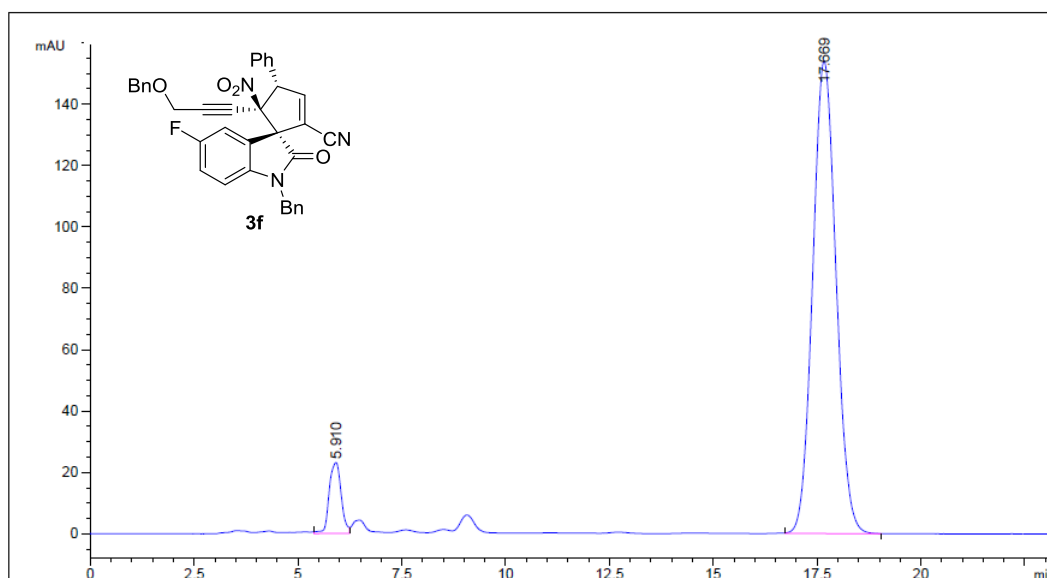

| Peak # | RetTime [min] | Type | Width [min] | Area mAU   | *s | Height [mAU] | Area %  |
|--------|---------------|------|-------------|------------|----|--------------|---------|
| 1      | 5.910         | BV   | 0.3212      | 463.70474  |    | 23.13674     | 7.1710  |
| 2      | 17.669        | BB   | 0.6064      | 6002.72852 |    | 153.91989    | 92.8290 |

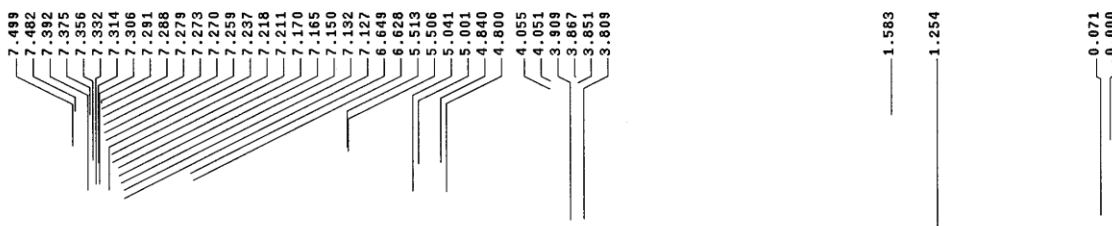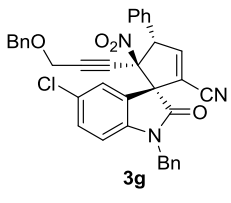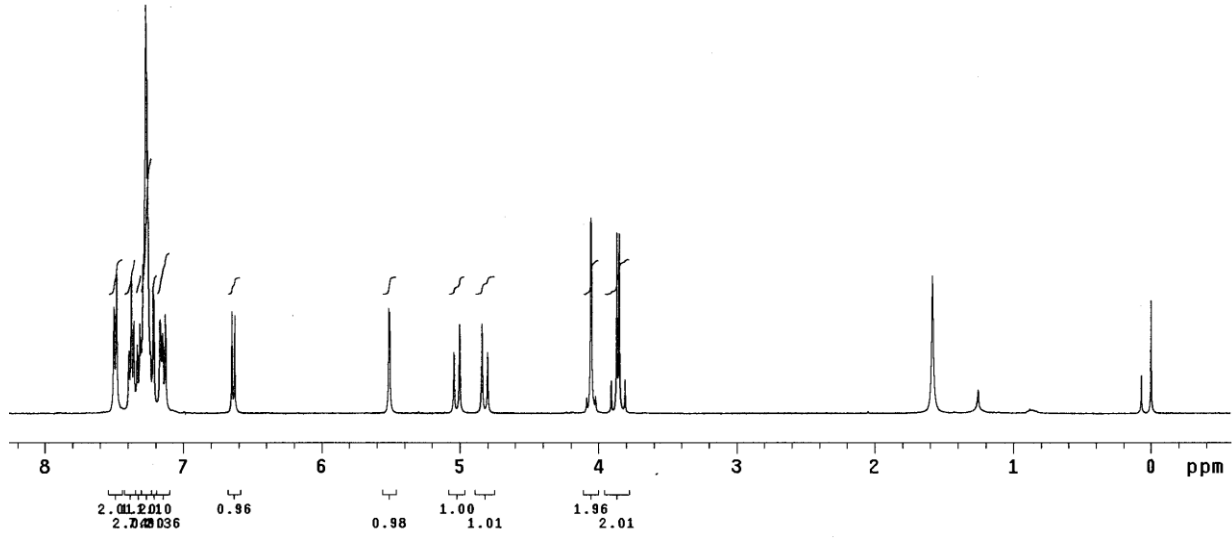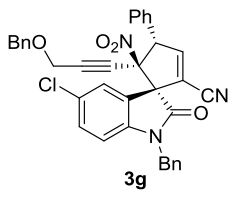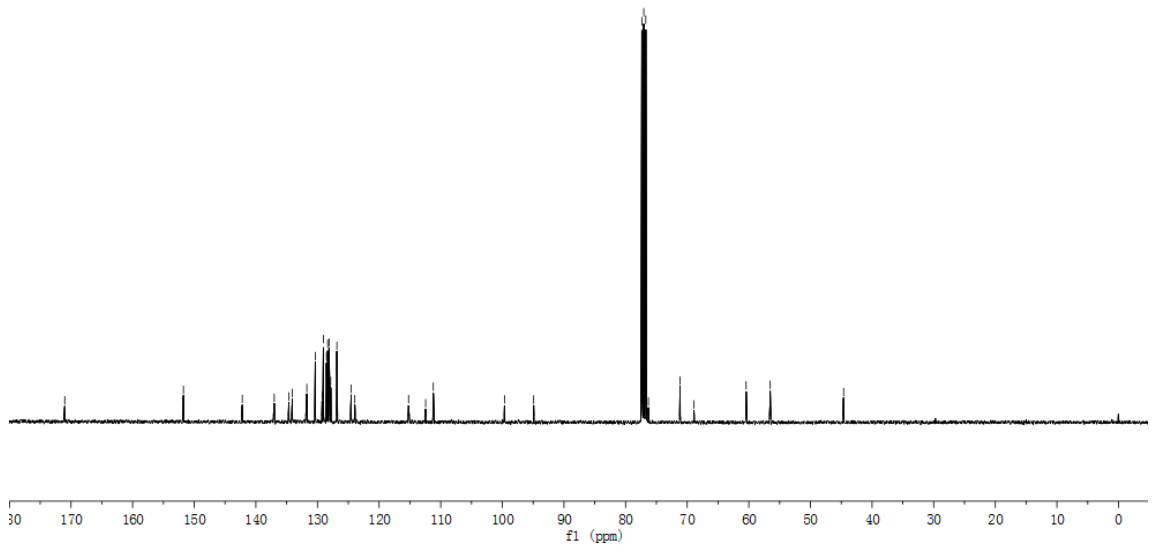

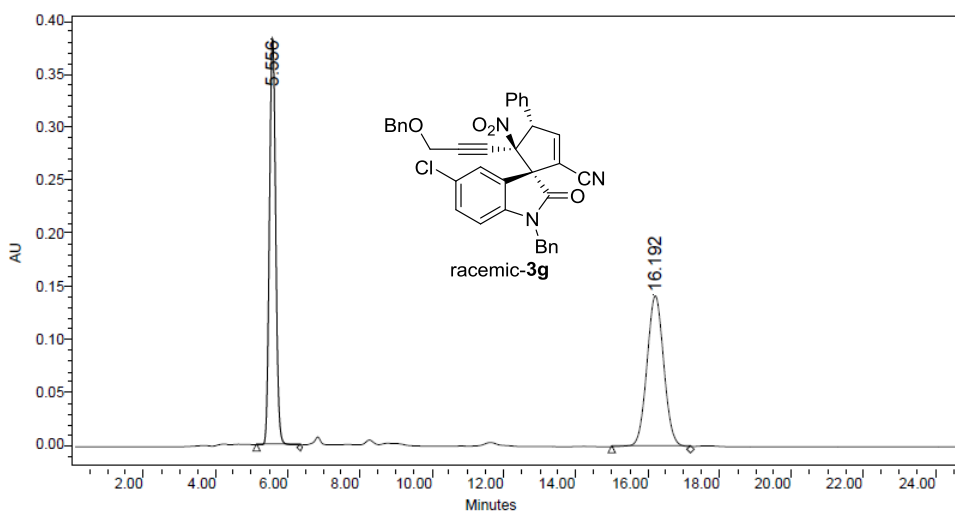

|   | RT (min) | Area (*sec) | % Area | Height ( ) | % Height |
|---|----------|-------------|--------|------------|----------|
| 1 | 5.556    | 4615173     | 49.98  | 383509     | 72.97    |
| 2 | 16.192   | 4618960     | 50.02  | 142048     | 27.03    |

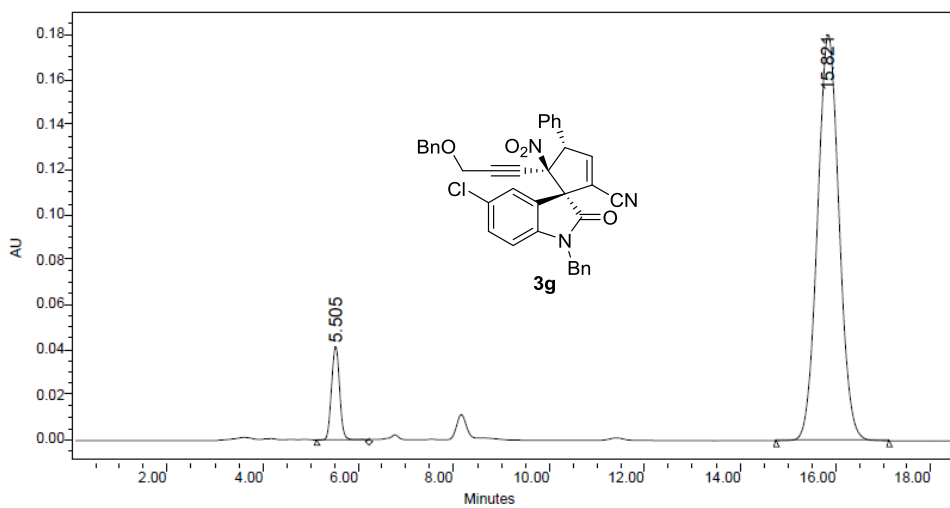

|   | RT (min) | Area (*sec) | % Area | Height ( ) | % Height |
|---|----------|-------------|--------|------------|----------|
| 1 | 5.505    | 492946      | 8.01   | 41442      | 18.67    |
| 2 | 15.821   | 5661250     | 91.99  | 180484     | 81.33    |

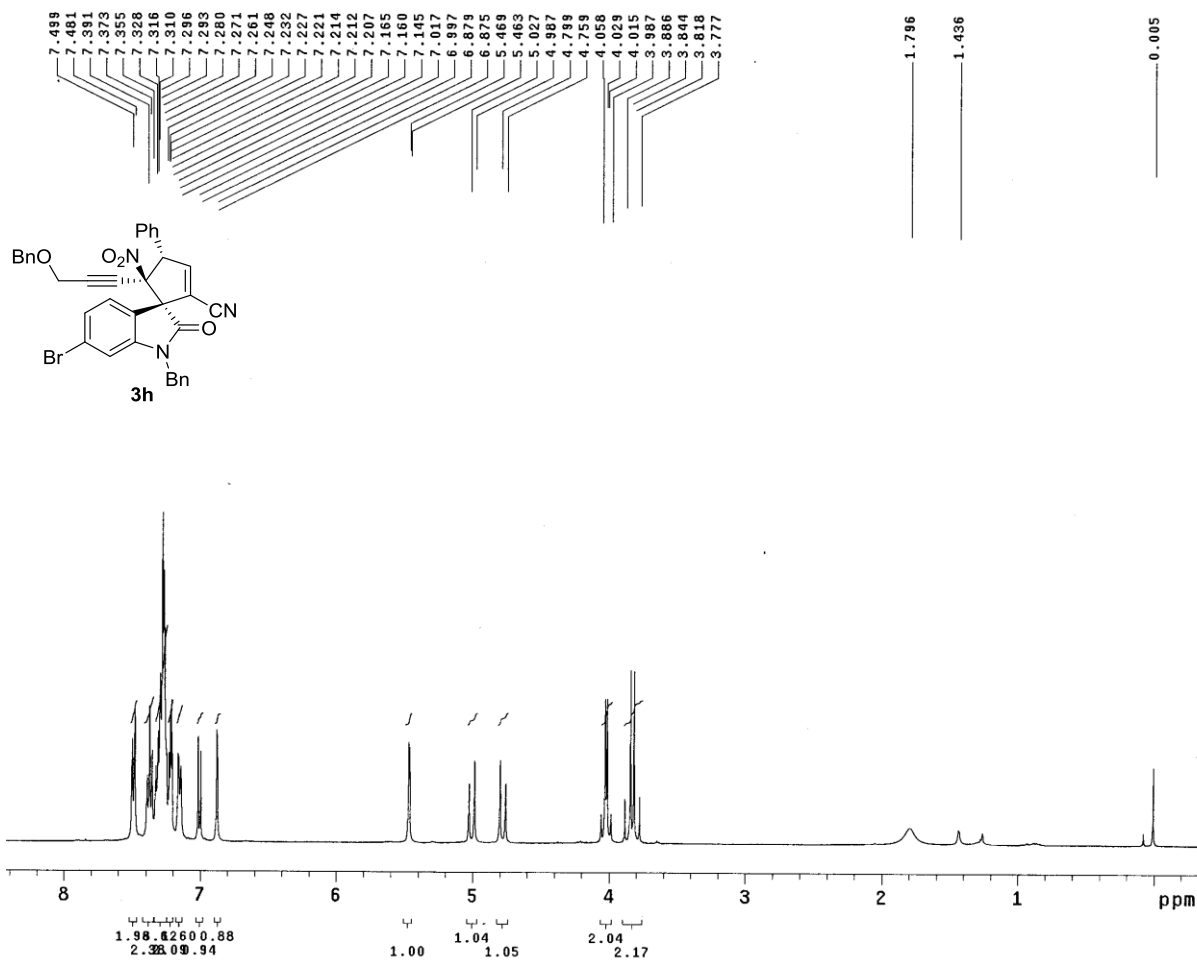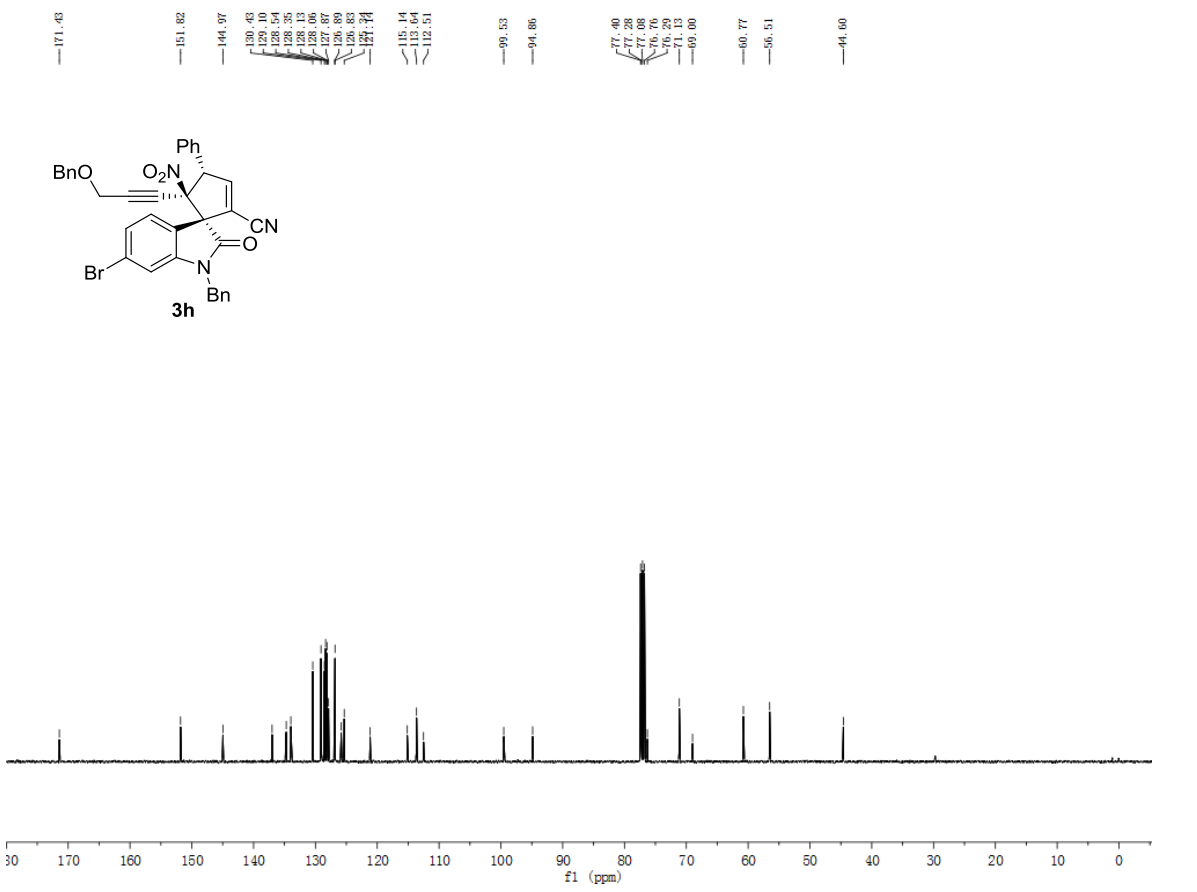

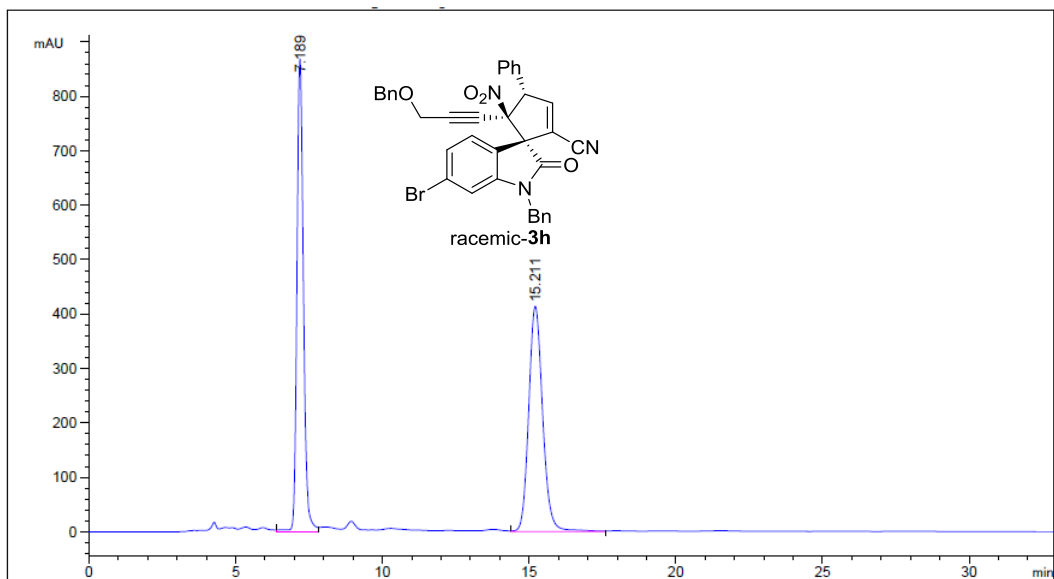

| Peak # | RetTime [min] | Type | Width [min] | Area mAU   | Area *s | Height [mAU] | Area %  |
|--------|---------------|------|-------------|------------|---------|--------------|---------|
| 1      | 7.189         | VV   | 0.2443      | 1.333978e4 |         | 867.38934    | 49.4286 |
| 2      | 15.211        | VB   | 0.5087      | 1.37076e4  |         | 413.84927    | 50.5714 |

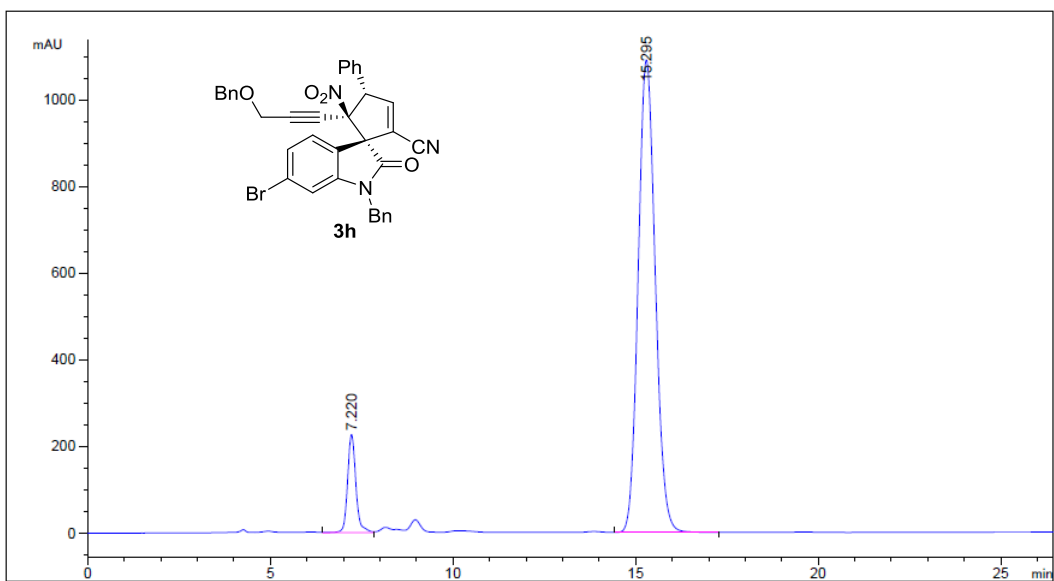

| Peak # | RetTime [min] | Type | Width [min] | Area mAU   | Area *s | Height [mAU] | Area %  |
|--------|---------------|------|-------------|------------|---------|--------------|---------|
| 1      | 7.220         | VV   | 0.2437      | 3597.09033 |         | 226.33247    | 9.2196  |
| 2      | 15.295        | VB   | 0.5070      | 3.54185e4  |         | 1090.76428   | 90.7804 |

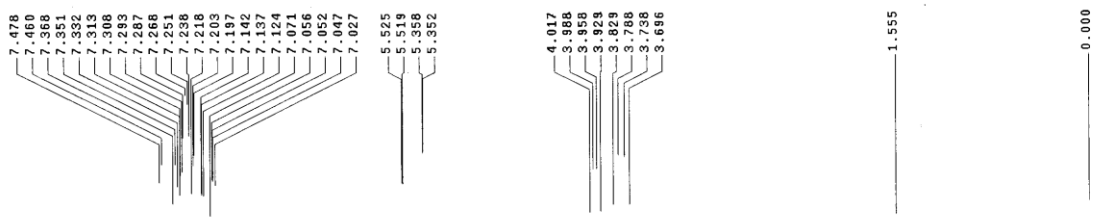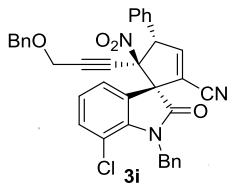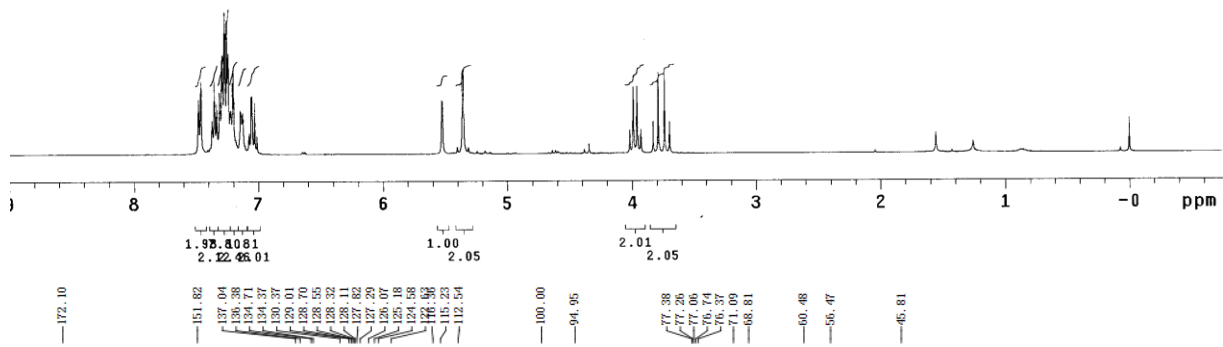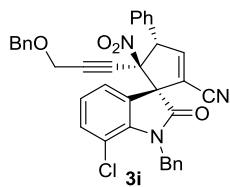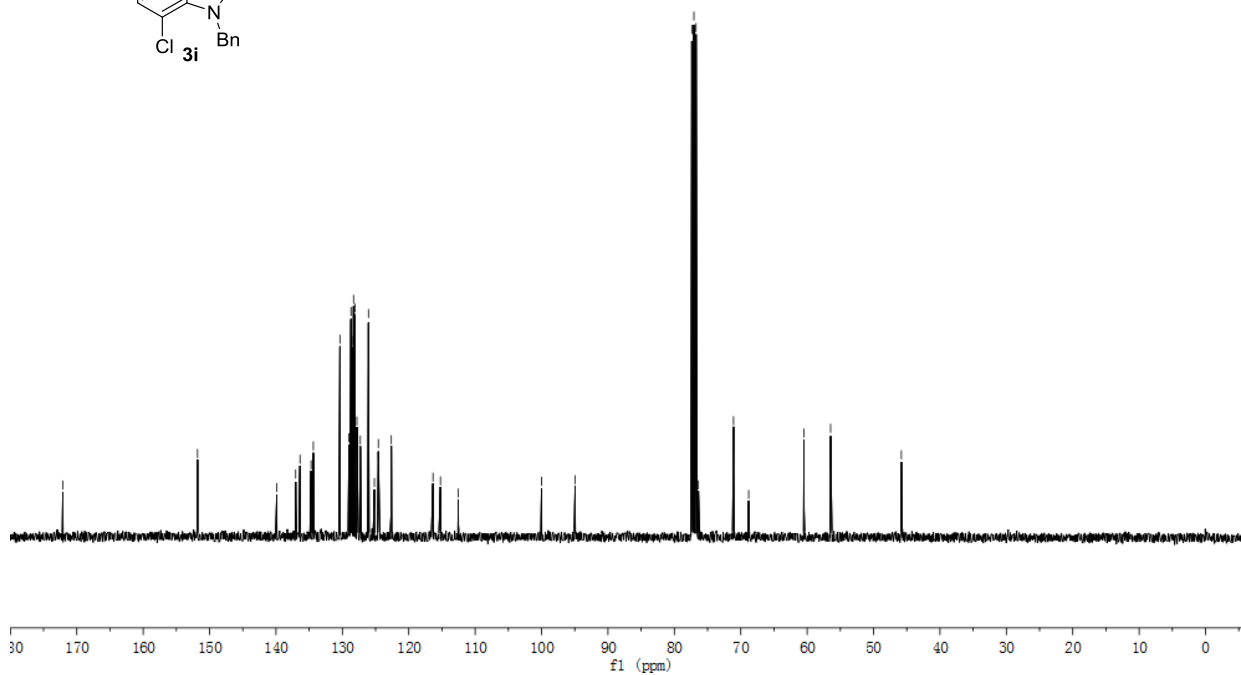

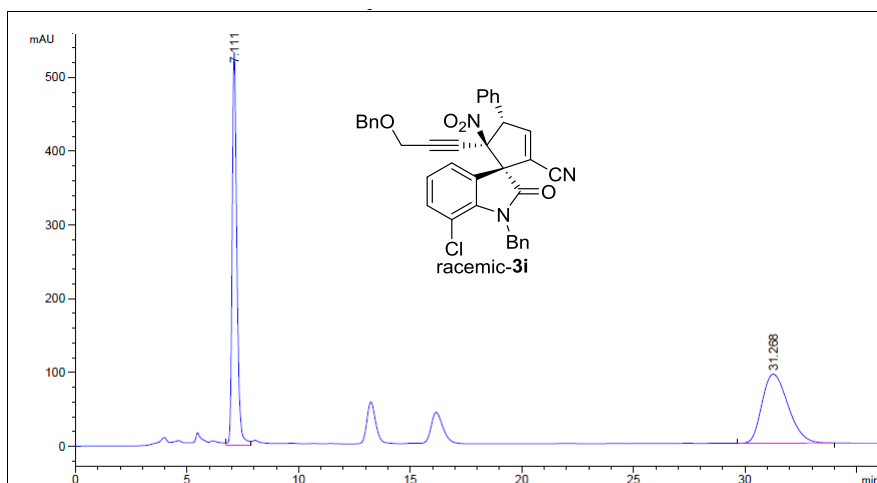

| Peak # | RetTime [min] | Type | Width [min] | Area mAU   | Area %  | Height [mAU] |
|--------|---------------|------|-------------|------------|---------|--------------|
| 1      | 7.111         | VV   | 0.2232      | 7787.90039 | 50.6248 | 532.05328    |
| 2      | 31.268        | BB   | 1.2789      | 7595.66455 | 49.3752 | 93.58517     |

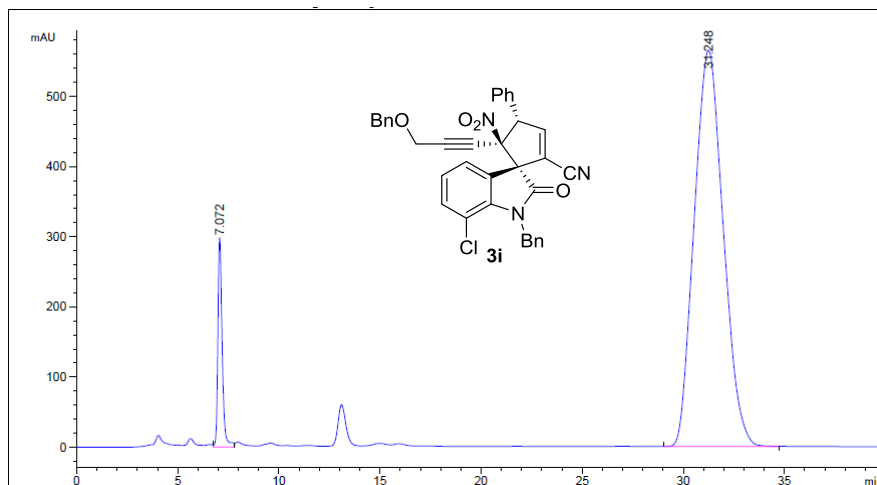

| Peak # | RetTime [min] | Type | Width [min] | Area mAU   | Area %  | Height [mAU] |
|--------|---------------|------|-------------|------------|---------|--------------|
| 1      | 7.072         | VV   | 0.2247      | 4396.73975 | 7.2296  | 297.76468    |
| 2      | 31.248        | BB   | 1.5438      | 5.64192e4  | 92.7704 | 564.86444    |

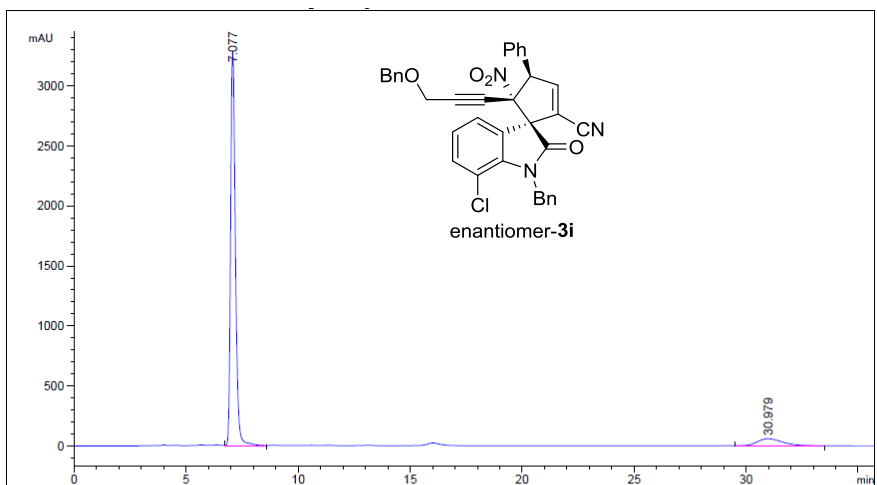

| Peak # | RetTime [min] | Type | Width [min] | Area mAU   | Area %  | Height [mAU] |
|--------|---------------|------|-------------|------------|---------|--------------|
| 1      | 7.077         | VV   | 0.2277      | 4.93668e4  | 91.8360 | 3286.48535   |
| 2      | 30.979        | BB   | 1.1953      | 4388.57910 | 8.1640  | 57.37062     |

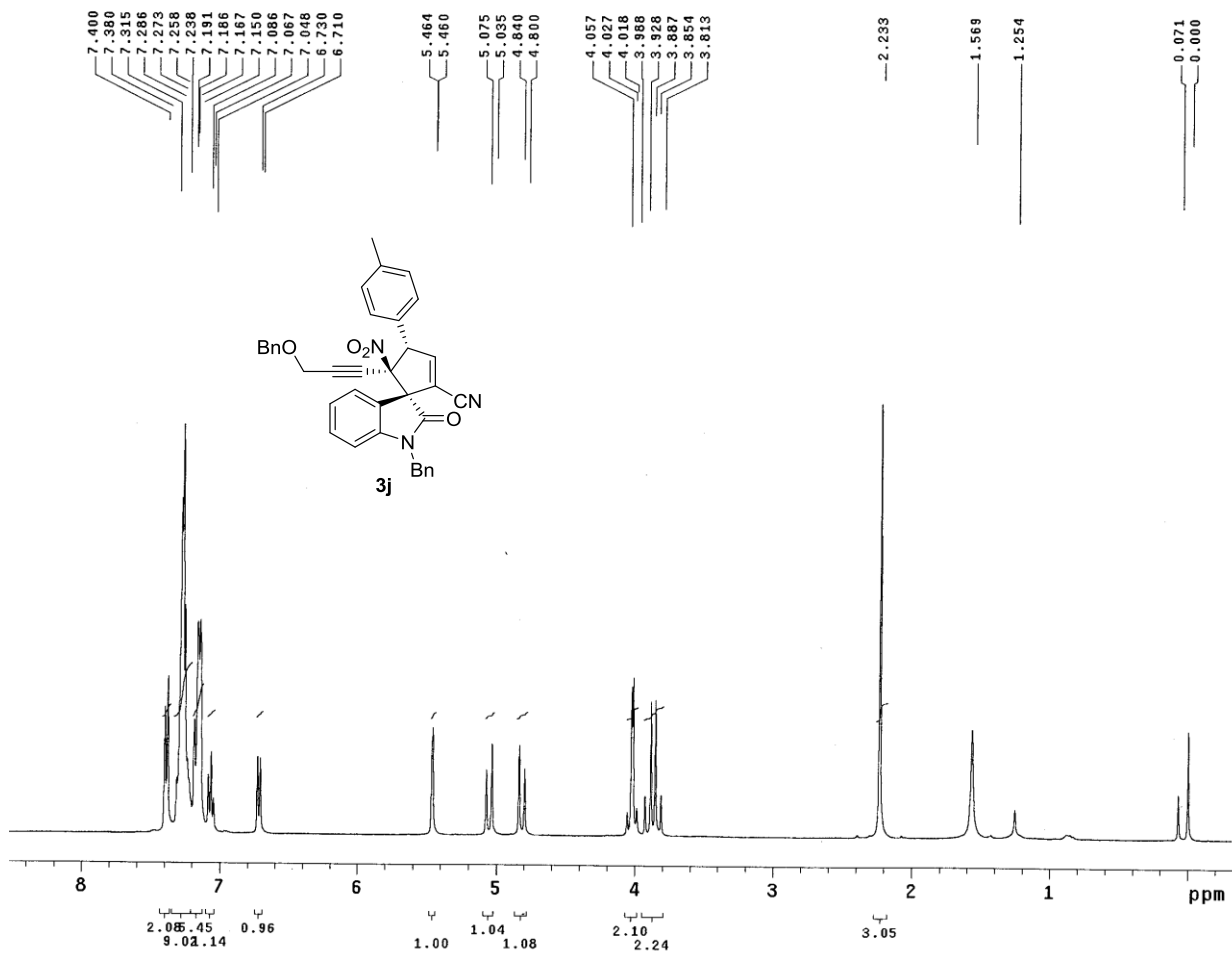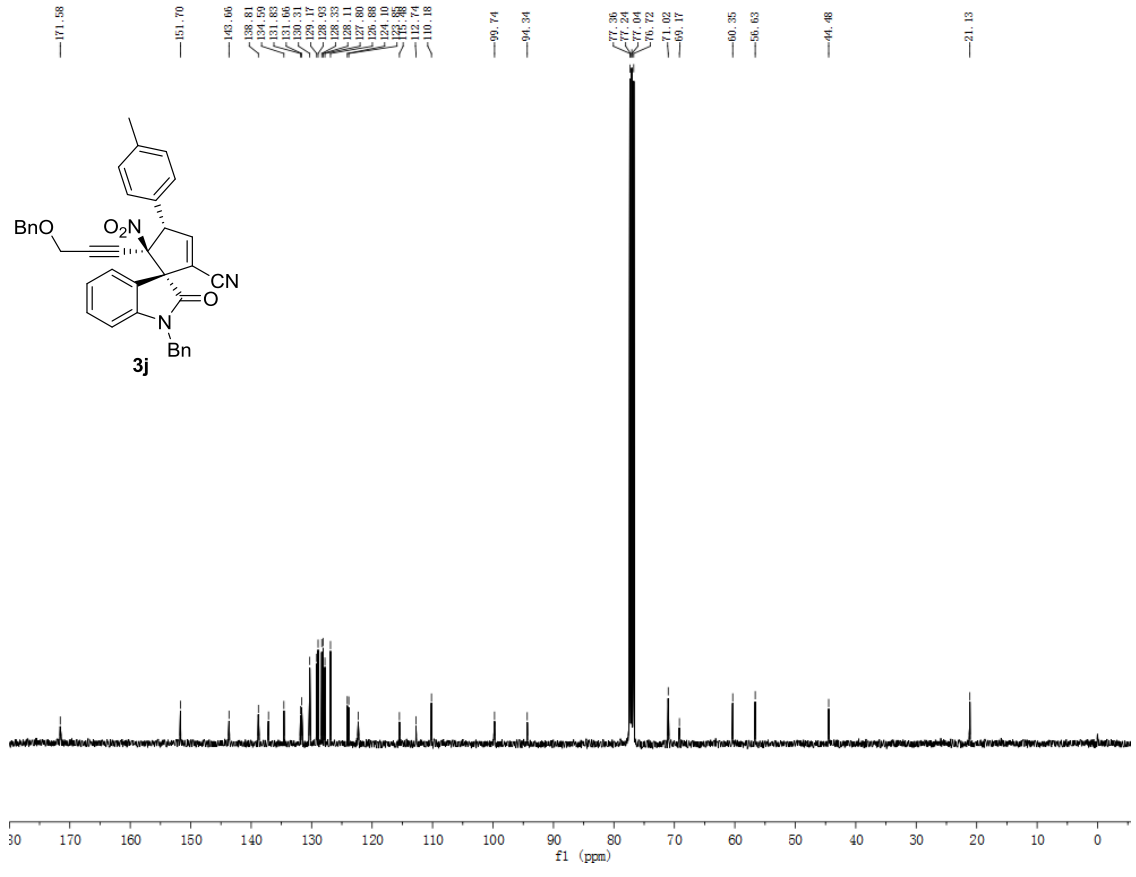



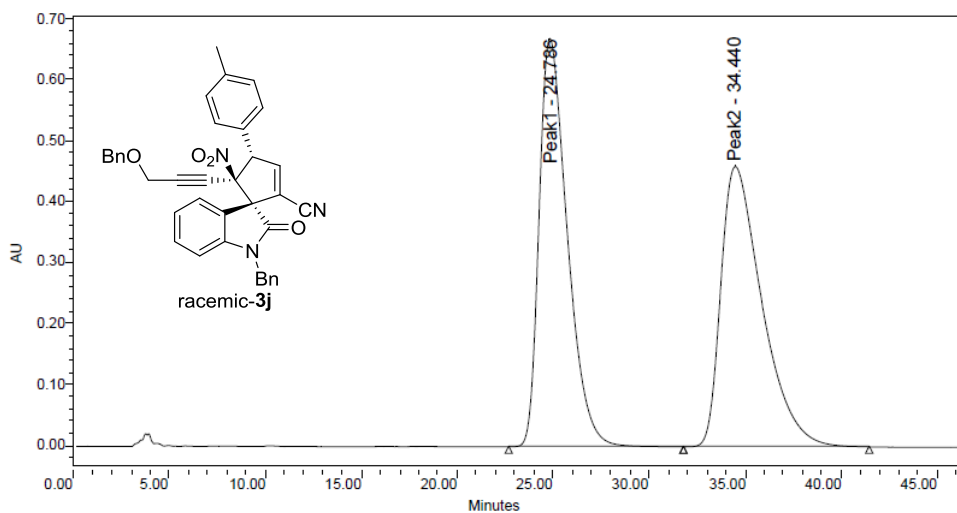

|   | Peak Name | RT (min) | Area ( *sec) | % Area | Height ( ) | % Height |
|---|-----------|----------|--------------|--------|------------|----------|
| 1 | Peak1     | 24.786   | 68355933     | 49.97  | 669626     | 59.28    |
| 2 | Peak2     | 34.440   | 68443851     | 50.03  | 459927     | 40.72    |

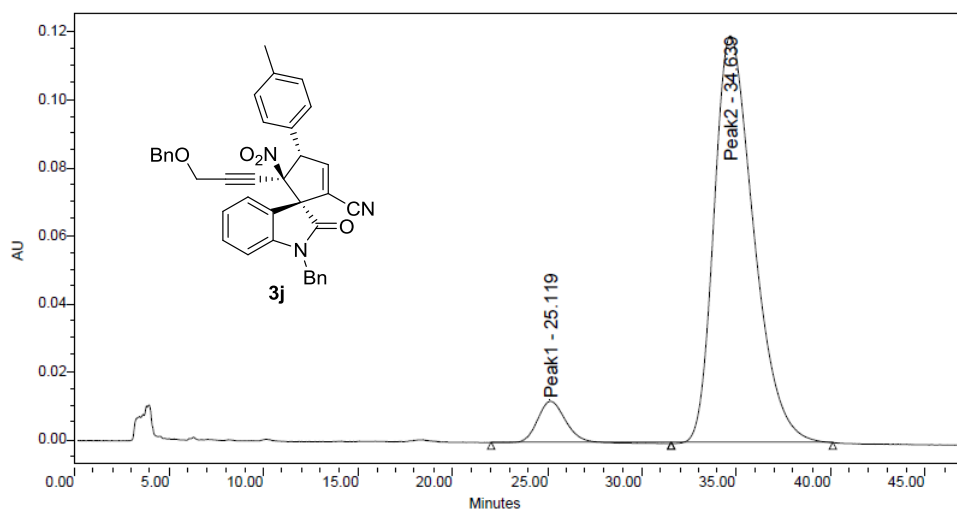

|   | Peak Name | RT (min) | Area ( *sec) | % Area | Height ( ) | % Height |
|---|-----------|----------|--------------|--------|------------|----------|
| 1 | Peak1     | 25.119   | 1301768      | 6.95   | 12277      | 9.30     |
| 2 | Peak2     | 34.639   | 17424820     | 93.05  | 119736     | 90.70    |

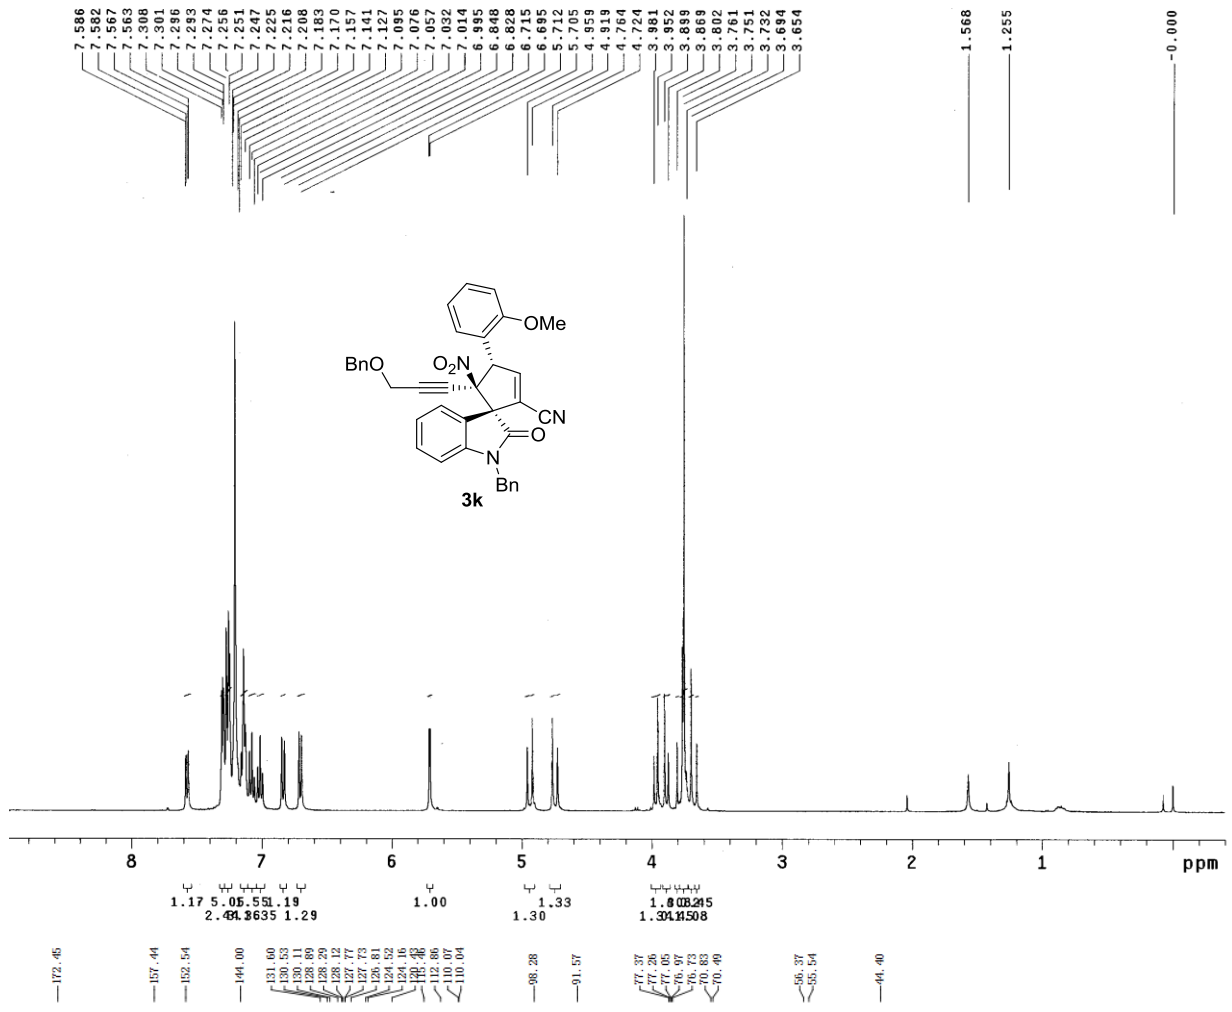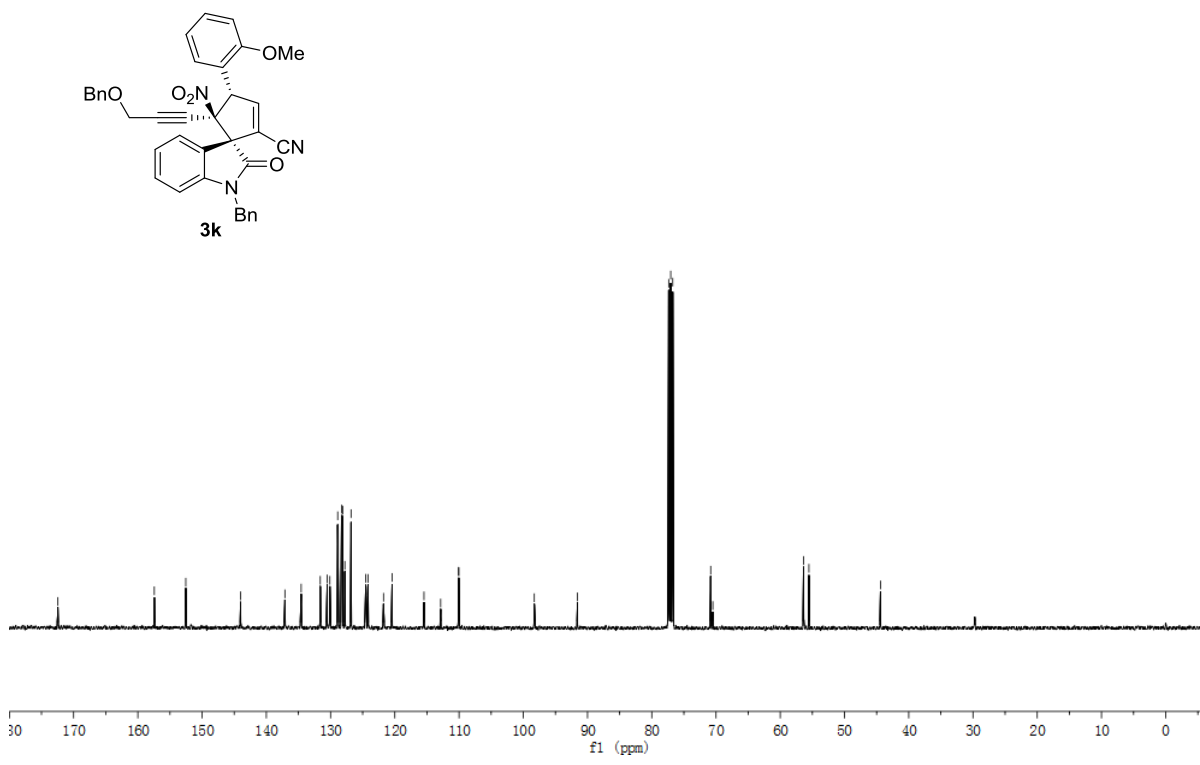

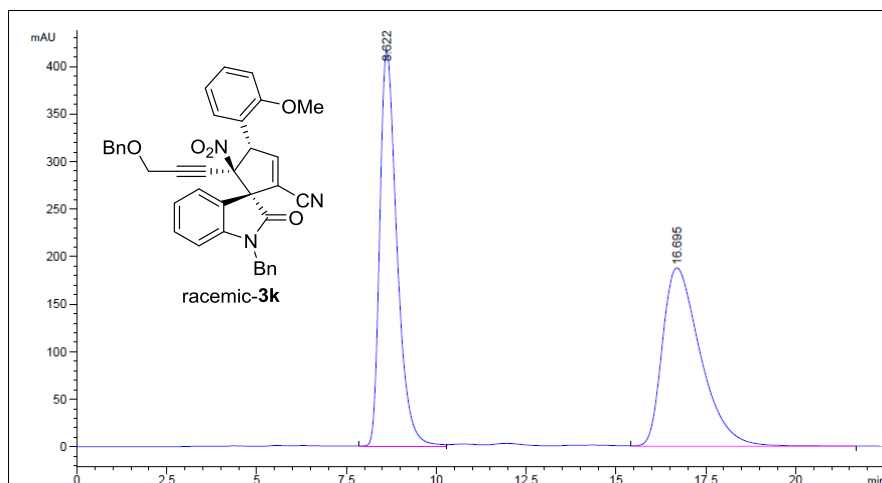

| Peak # | RetTime [min] | Type | Width [min] | Area mAU  | Area %  | Height [mAU] |
|--------|---------------|------|-------------|-----------|---------|--------------|
| 1      | 8.622         | VV   | 0.5103      | 1.38352e4 | 50.0648 | 416.03738    |
| 2      | 16.695        | VB   | 1.1261      | 1.37994e4 | 49.9352 | 187.60307    |

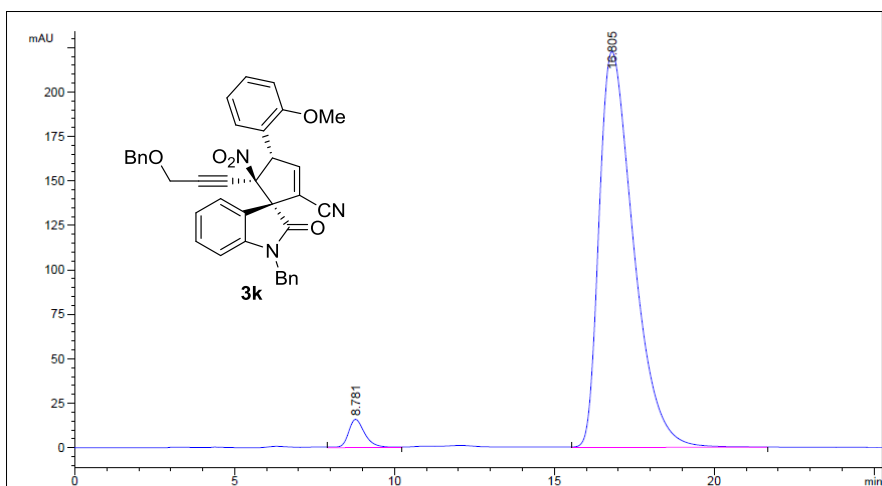

| Peak # | RetTime [min] | Type | Width [min] | Area mAU  | Area %  | Height [mAU] |
|--------|---------------|------|-------------|-----------|---------|--------------|
| 1      | 8.781         | VB   | 0.5432      | 572.45154 | 3.3313  | 15.86849     |
| 2      | 16.805        | BB   | 1.1507      | 1.66115e4 | 96.6687 | 222.47063    |

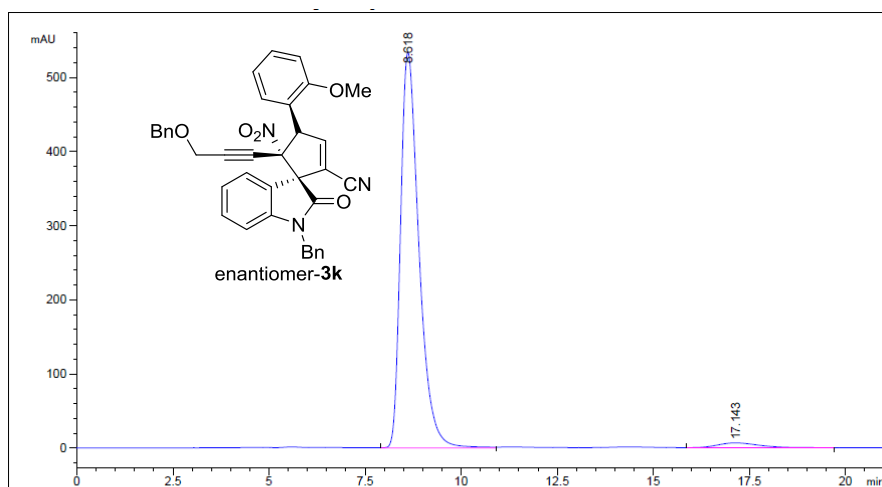

| Peak # | RetTime [min] | Type | Width [min] | Area mAU  | Area %  | Height [mAU] |
|--------|---------------|------|-------------|-----------|---------|--------------|
| 1      | 8.618         | VV   | 0.5106      | 1.77406e4 | 97.2539 | 532.98291    |
| 2      | 17.143        | VB   | 1.1521      | 500.92450 | 2.7461  | 6.60936      |

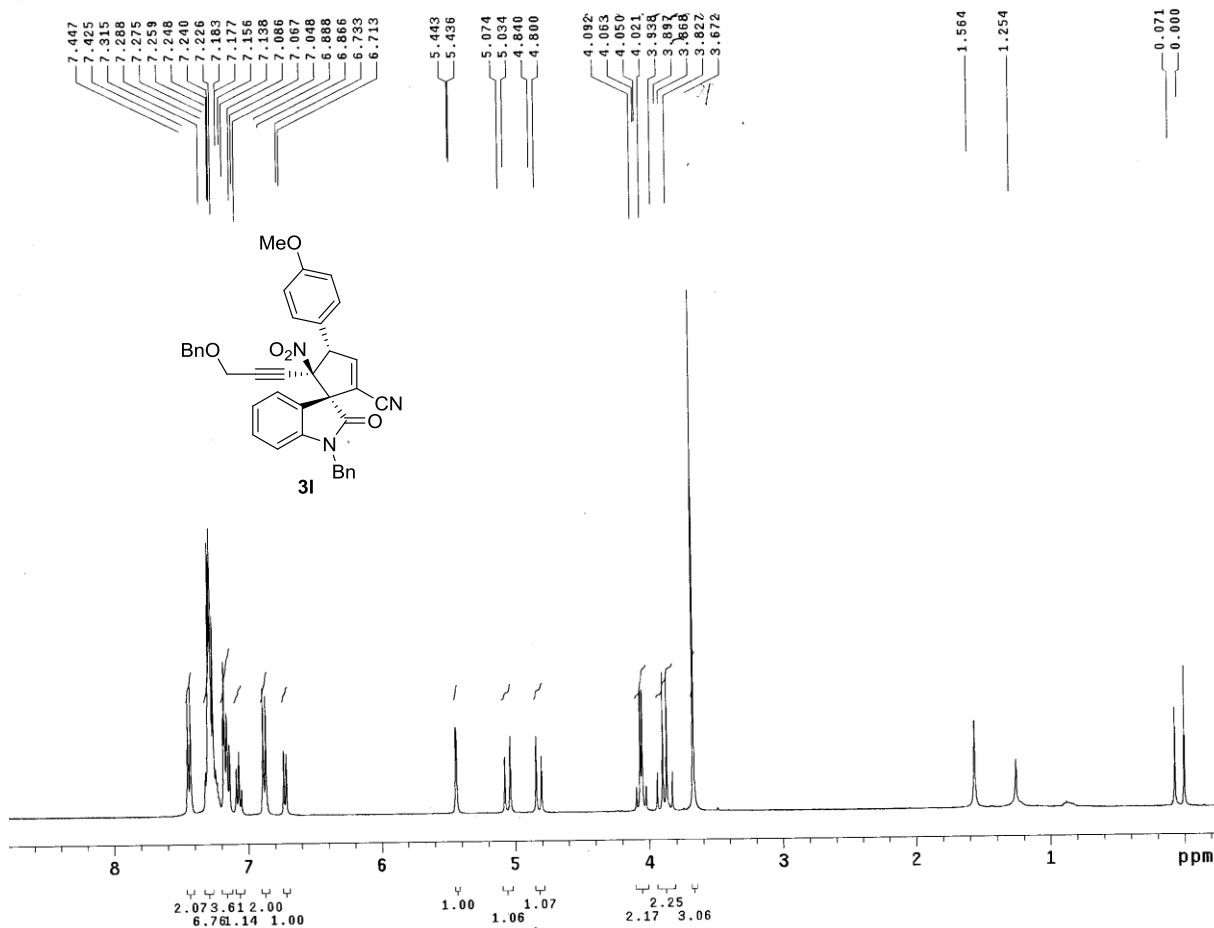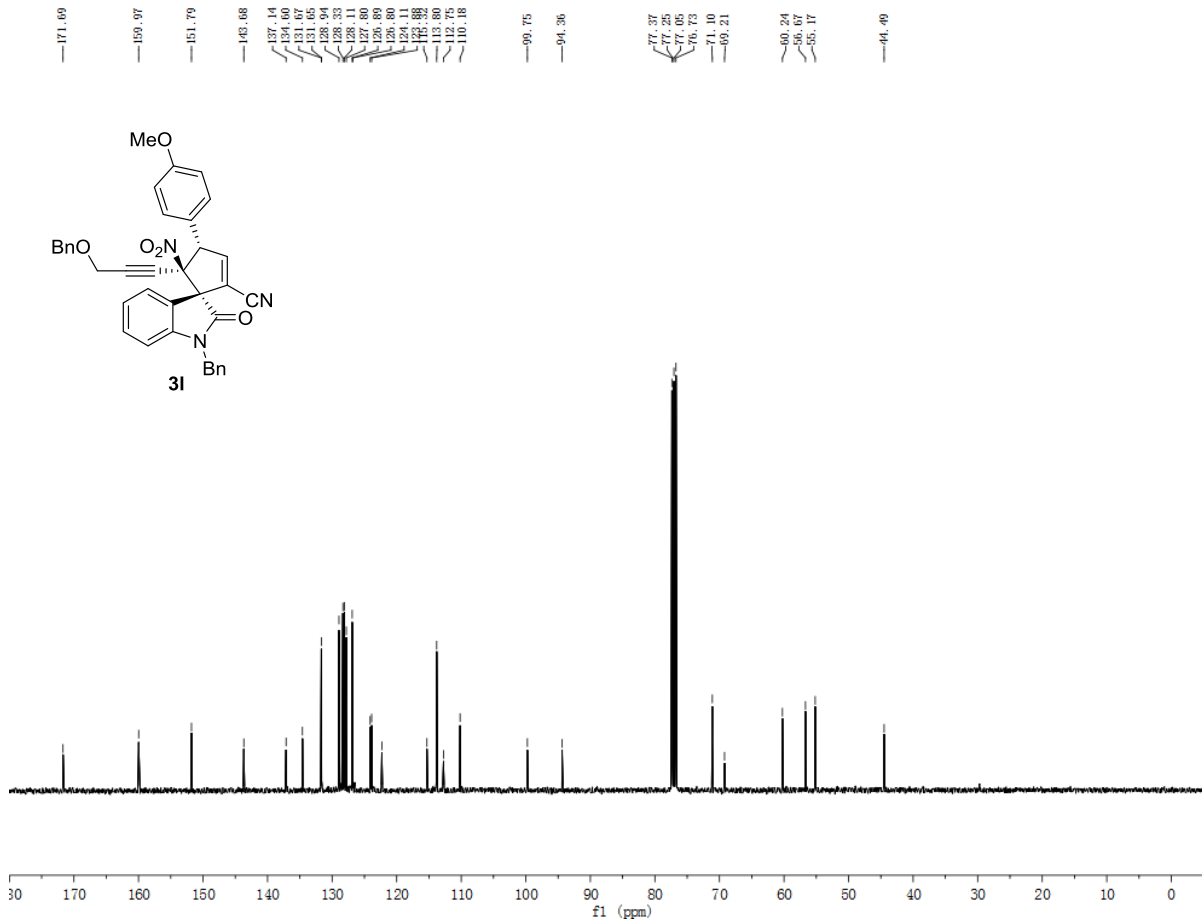

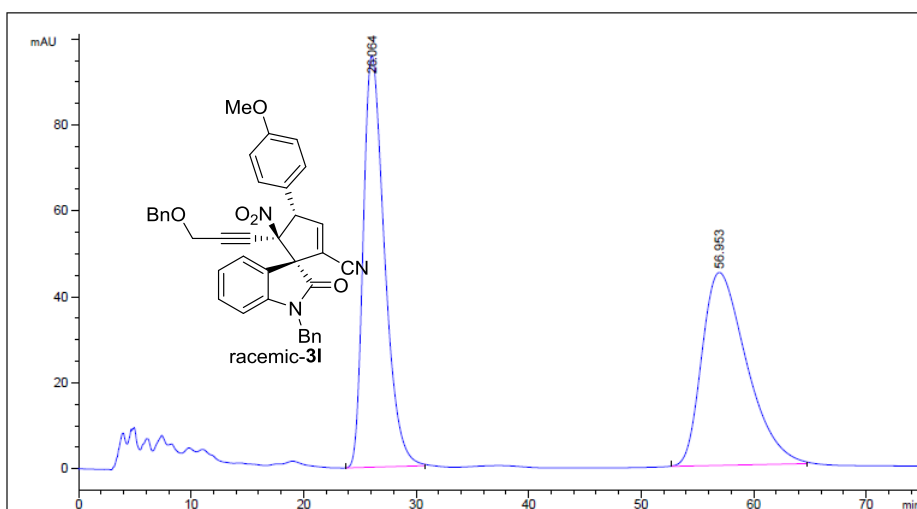

| Peak # | RetTime [min] | Type | Width [min] | Area mAU  | Area %  | Height [mAU] | Area %  |
|--------|---------------|------|-------------|-----------|---------|--------------|---------|
| 1      | 26.064        | BB   | 2.0134      | 1.25589e4 | 50.3056 | 95.76397     | 50.3056 |
| 2      | 56.953        | BB   | 4.0224      | 1.24063e4 | 49.6944 | 44.88697     | 49.6944 |

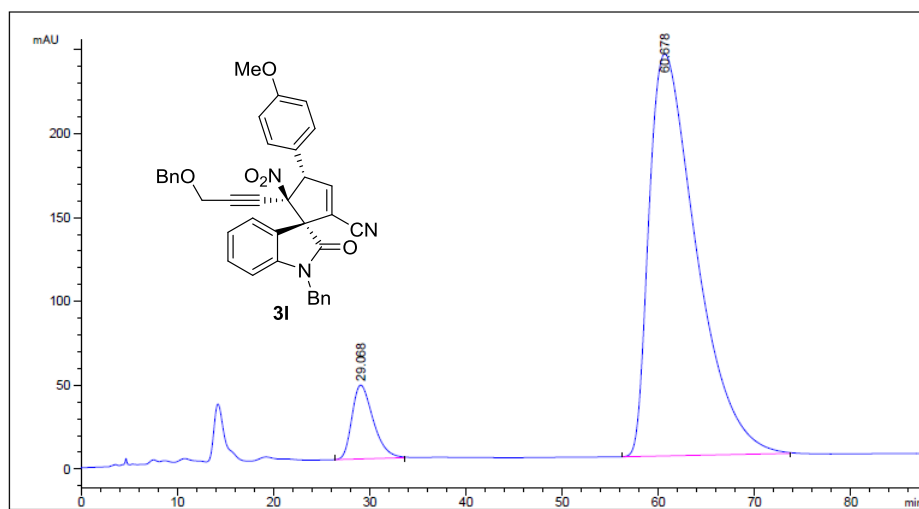

| Peak # | RetTime [min] | Type | Width [min] | Area mAU   | Area %  | Height [mAU] | Area %  |
|--------|---------------|------|-------------|------------|---------|--------------|---------|
| 1      | 29.068        | BB   | 2.3478      | 6768.31787 | 7.6427  | 44.00336     | 7.6427  |
| 2      | 60.678        | BB   | 5.2232      | 8.17912e4  | 92.3573 | 239.59181    | 92.3573 |

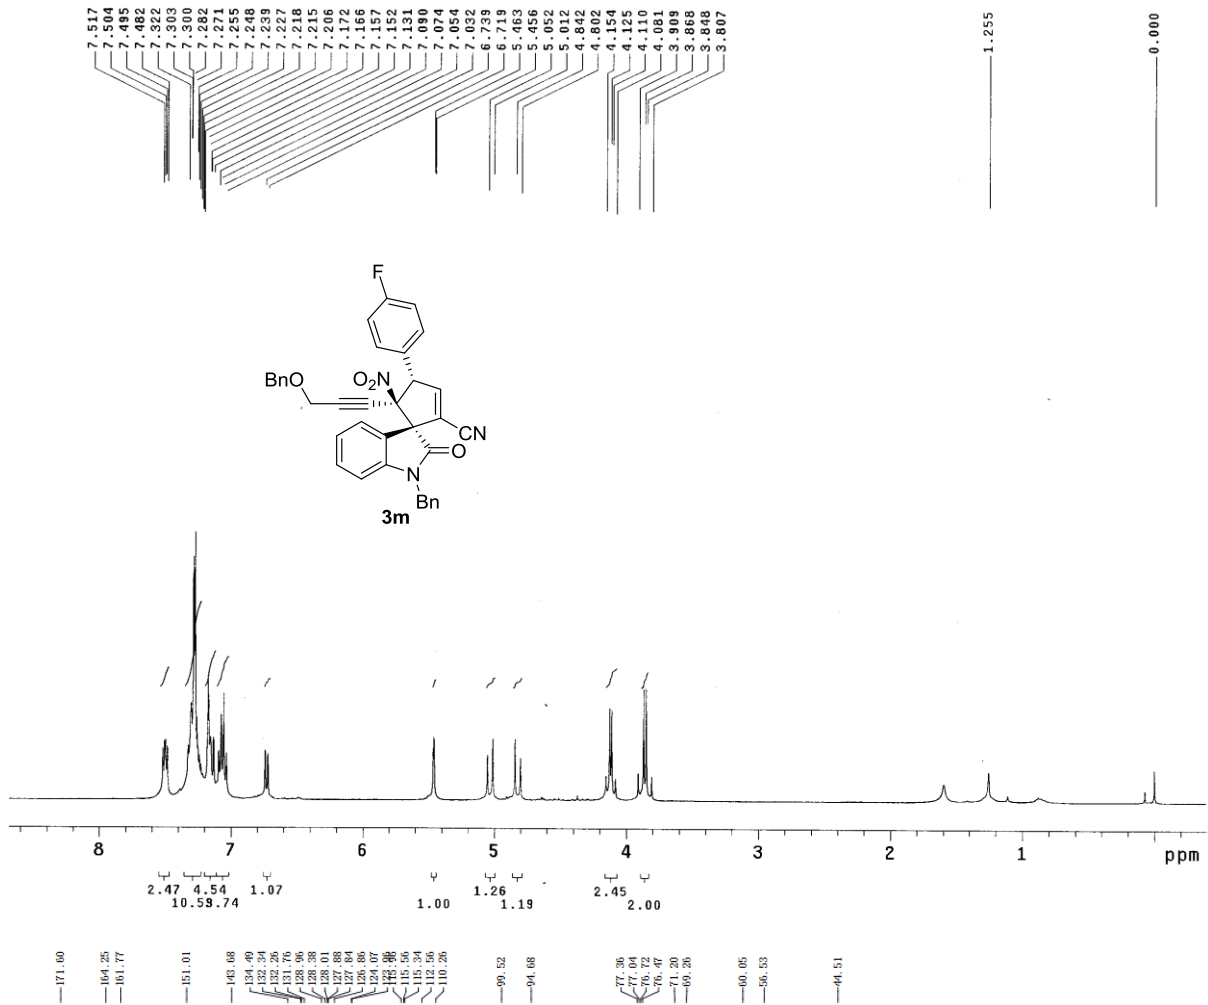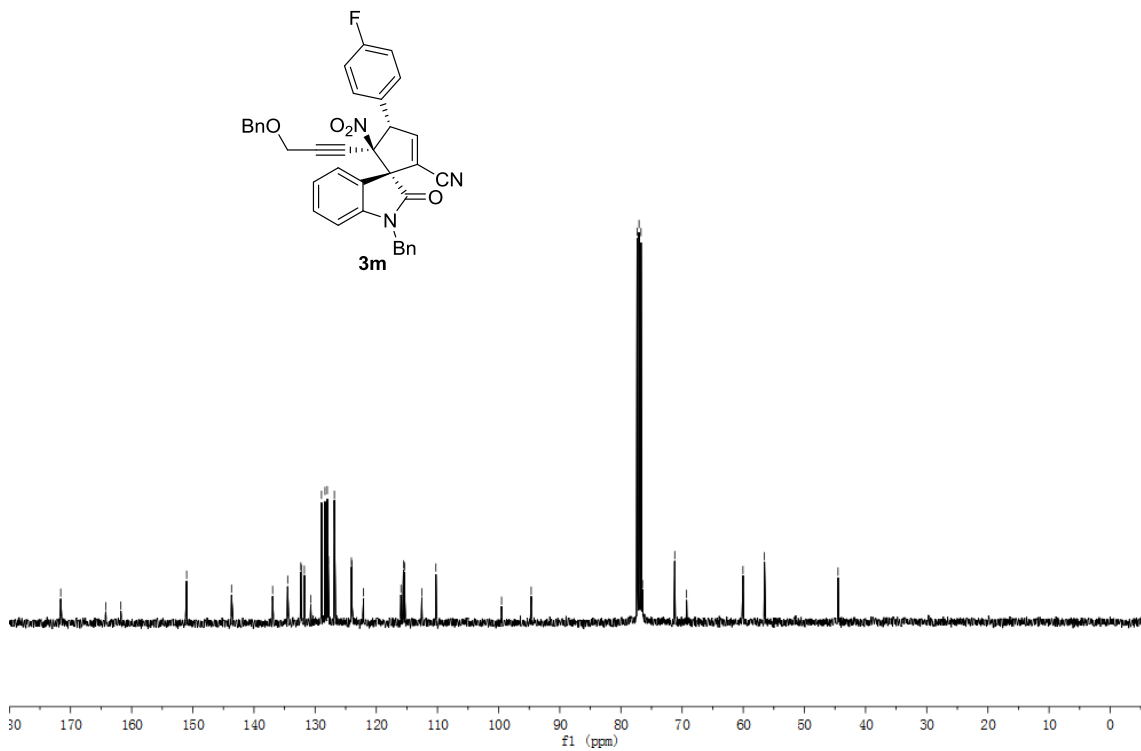

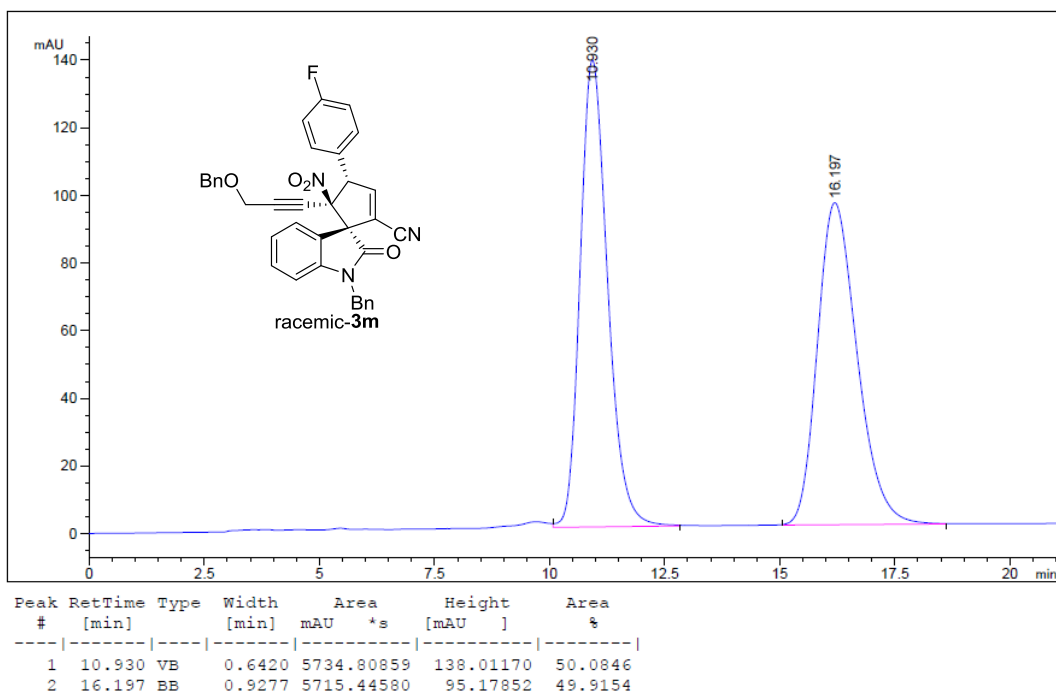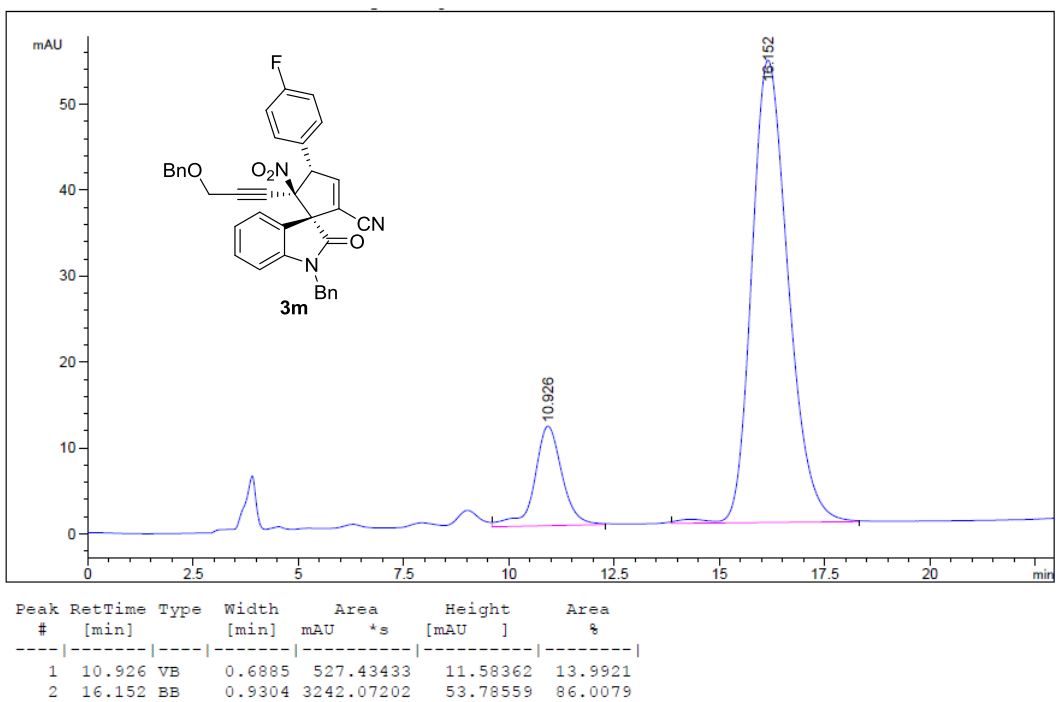

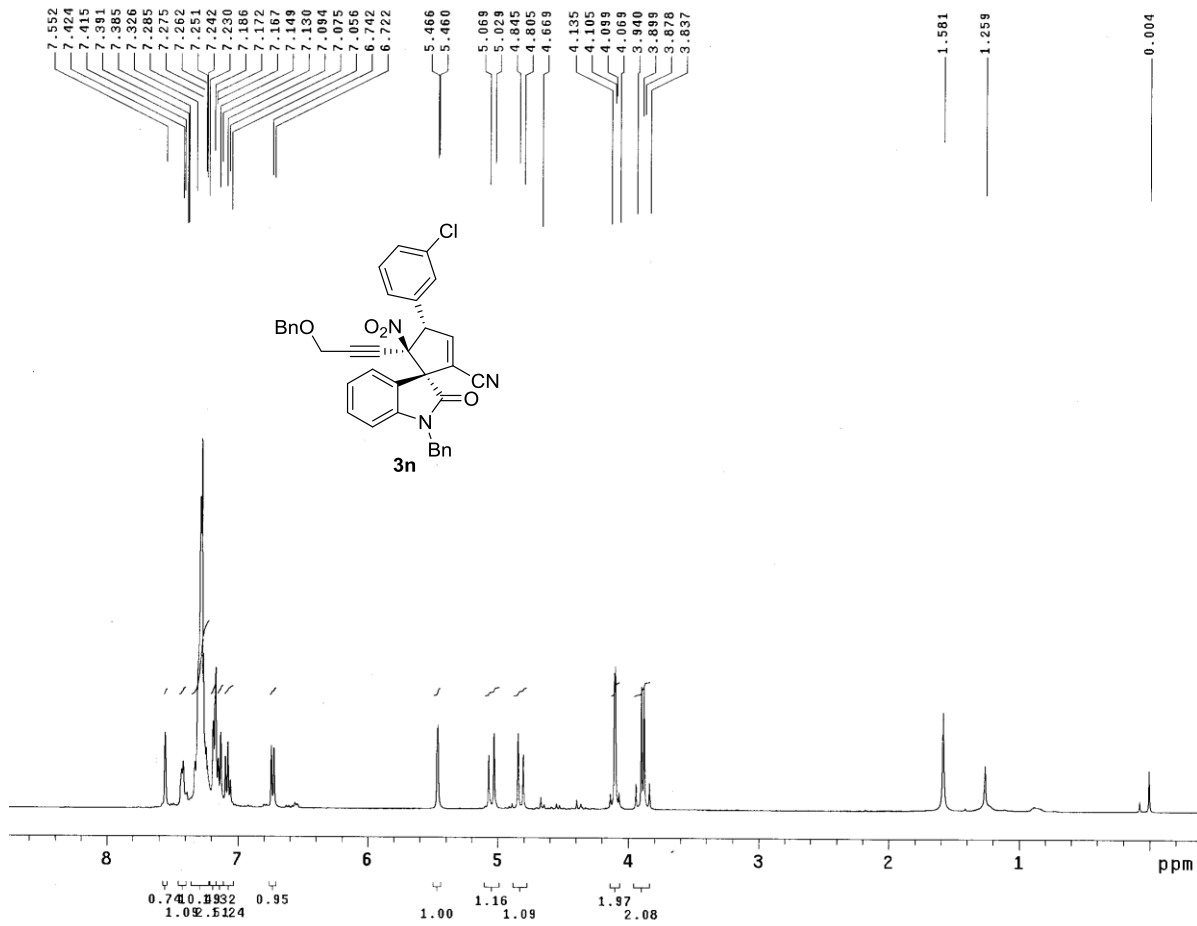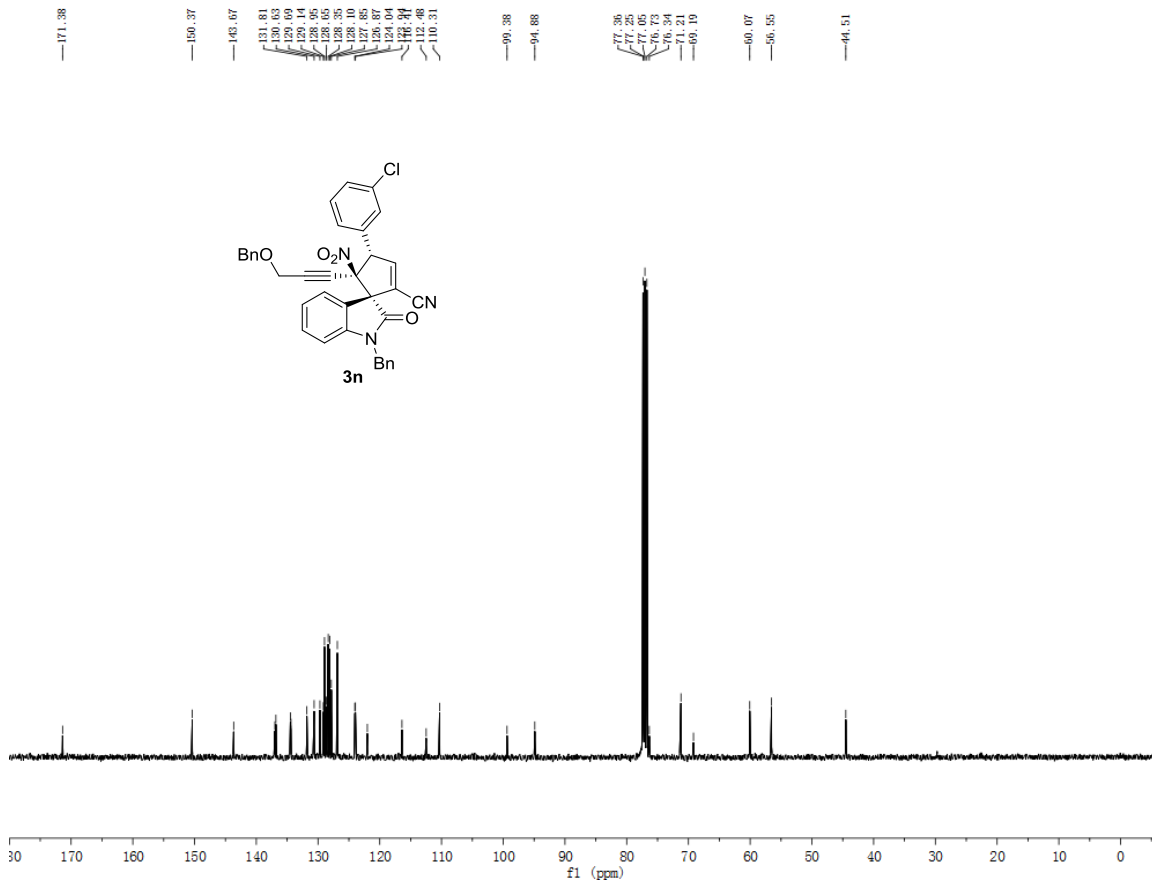



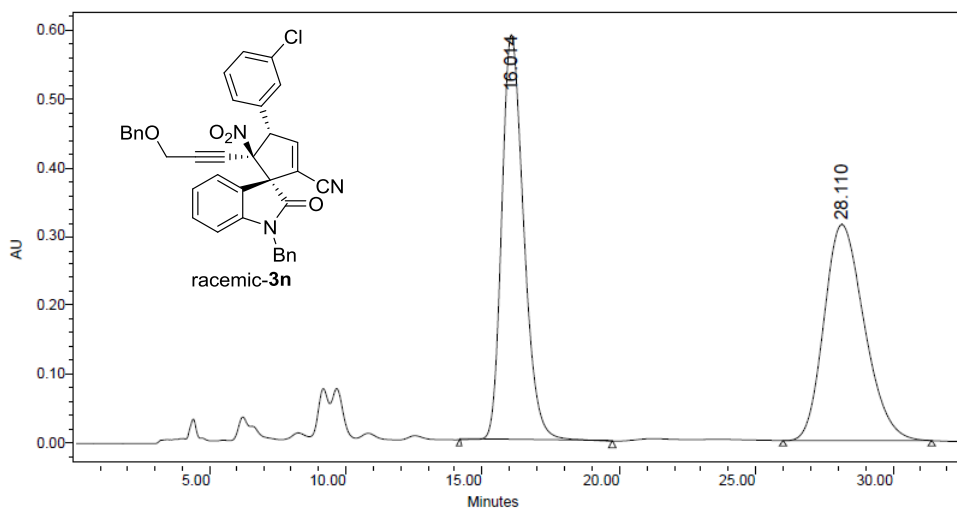

|   | RT (min) | Area (*sec) | % Area | Height ( ) | % Height |
|---|----------|-------------|--------|------------|----------|
| 1 | 16.014   | 33102757    | 50.59  | 590521     | 65.23    |
| 2 | 28.110   | 32334155    | 49.41  | 314761     | 34.77    |

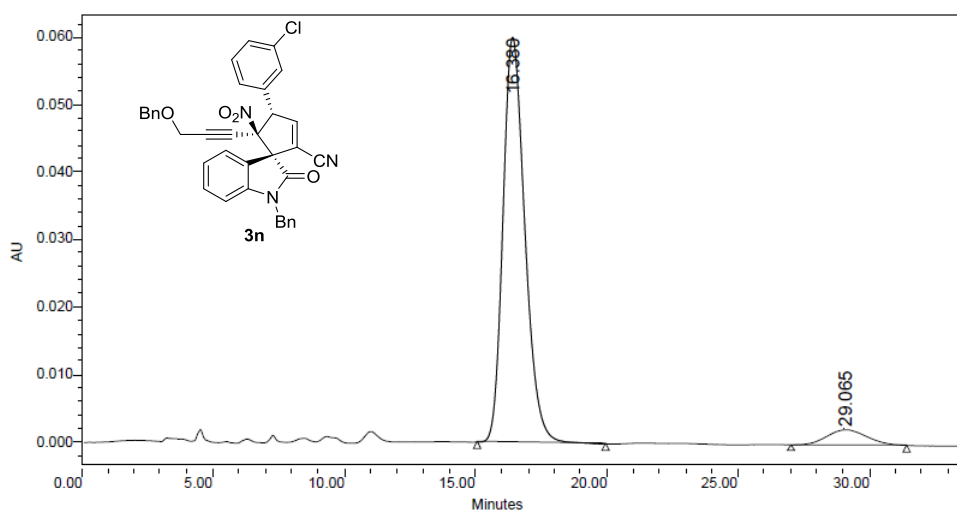

|   | RT (min) | Area (*sec) | % Area | Height ( ) | % Height |
|---|----------|-------------|--------|------------|----------|
| 1 | 16.380   | 3490405     | 93.47  | 60091      | 96.35    |
| 2 | 29.065   | 243822      | 6.53   | 2275       | 3.65     |

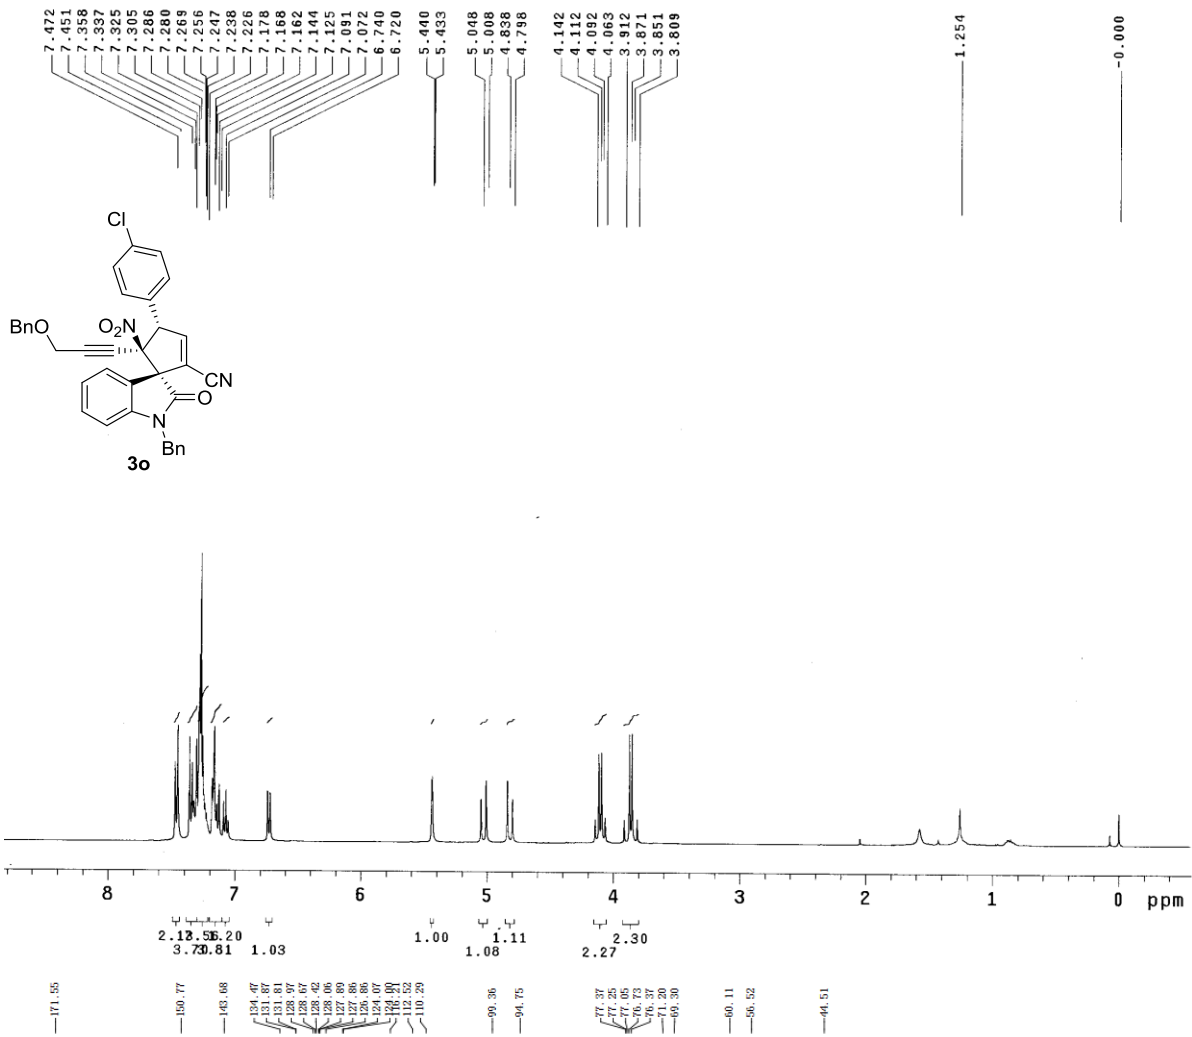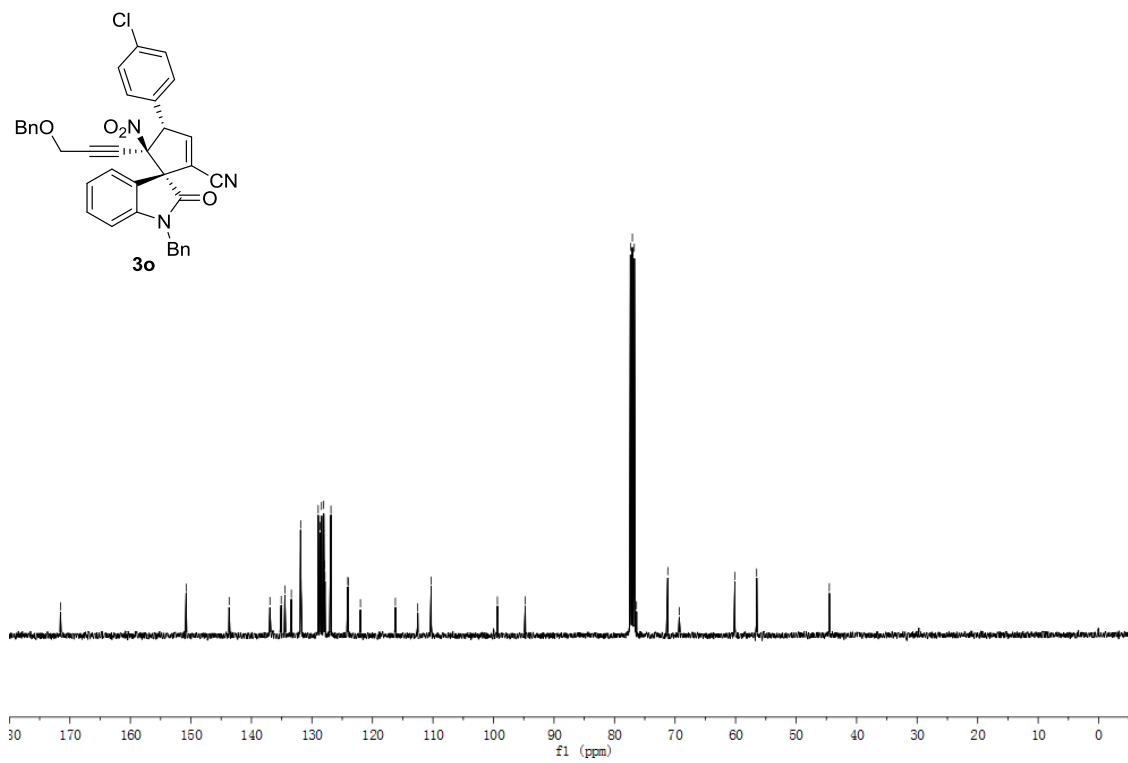

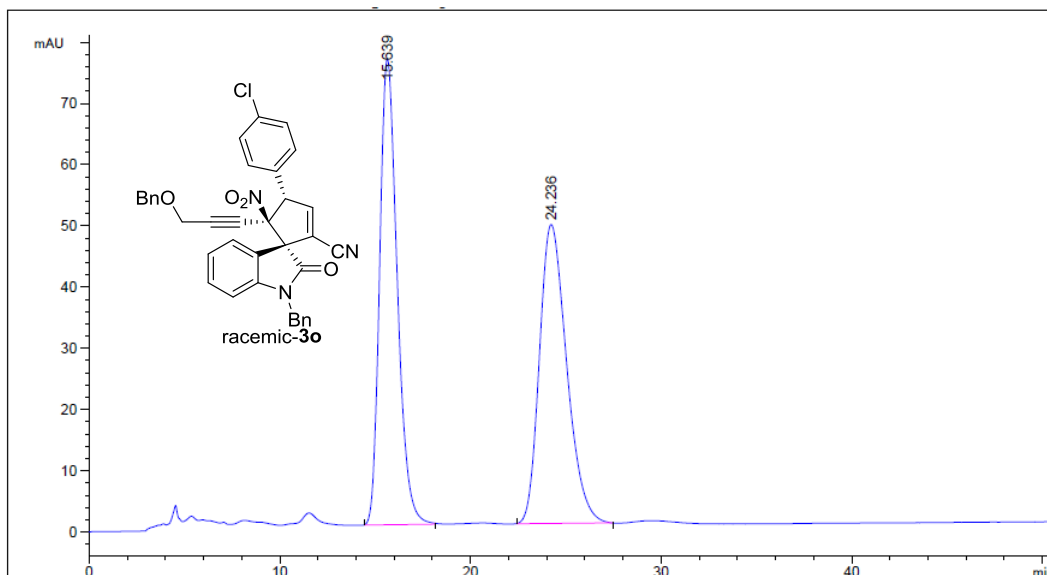

| Peak # | RetTime [min] | Type | Width [min] | Area mAU   | Area *s | Height [mAU] | Area %  |
|--------|---------------|------|-------------|------------|---------|--------------|---------|
| 1      | 15.639        | BB   | 0.9910      | 4869.78125 |         | 76.11813     | 50.1441 |
| 2      | 24.236        | BB   | 1.5357      | 4841.79590 |         | 48.81699     | 49.8559 |

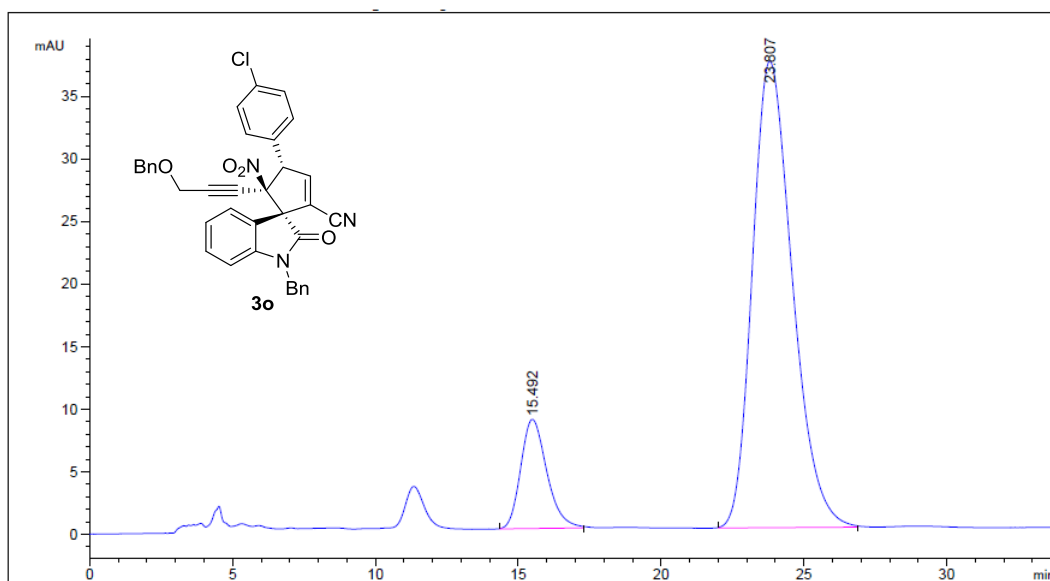

| Peak # | RetTime [min] | Type | Width [min] | Area mAU   | Area *s | Height [mAU] | Area %  |
|--------|---------------|------|-------------|------------|---------|--------------|---------|
| 1      | 15.492        | BB   | 0.9800      | 554.19824  |         | 8.72305      | 13.2396 |
| 2      | 23.807        | BB   | 1.5030      | 3631.69995 |         | 37.29377     | 86.7604 |

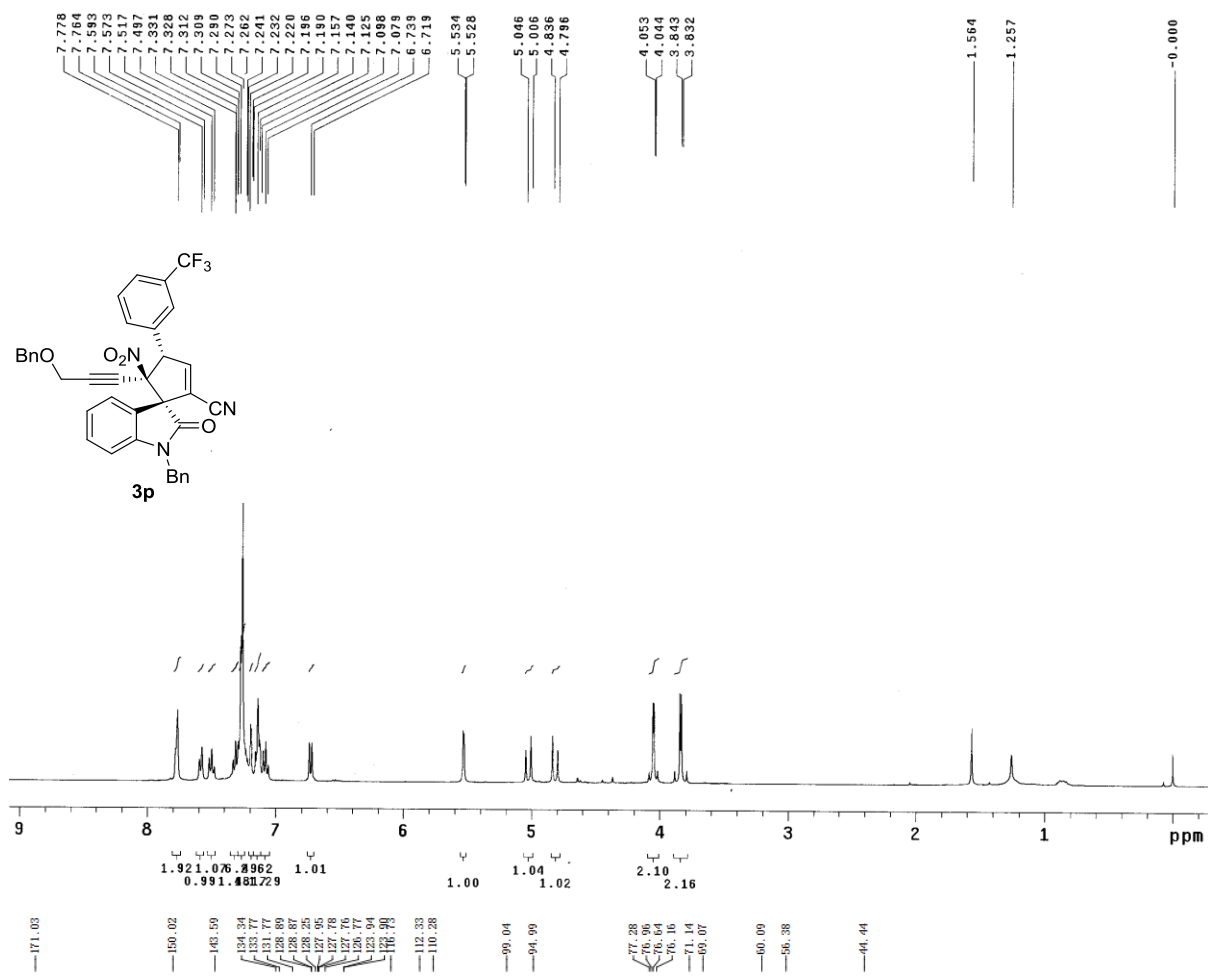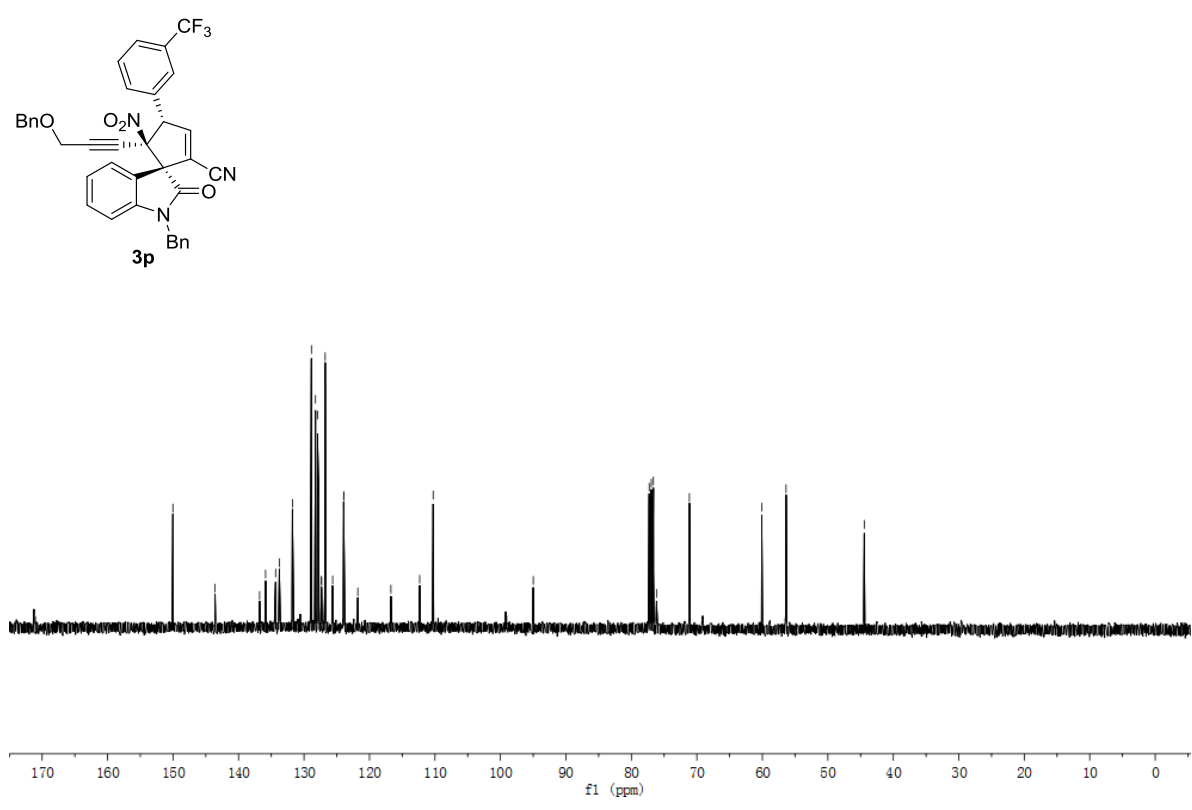

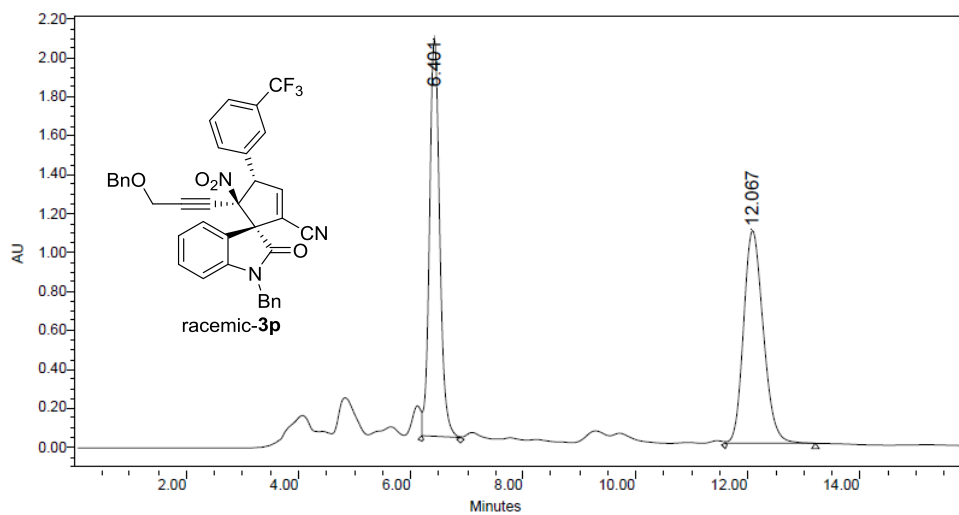

|   | RT (min) | Area (*sec) | % Area | Height ( ) | % Height |
|---|----------|-------------|--------|------------|----------|
| 1 | 6.401    | 25780249    | 49.19  | 2044871    | 65.17    |
| 2 | 12.067   | 26628300    | 50.81  | 1092999    | 34.83    |

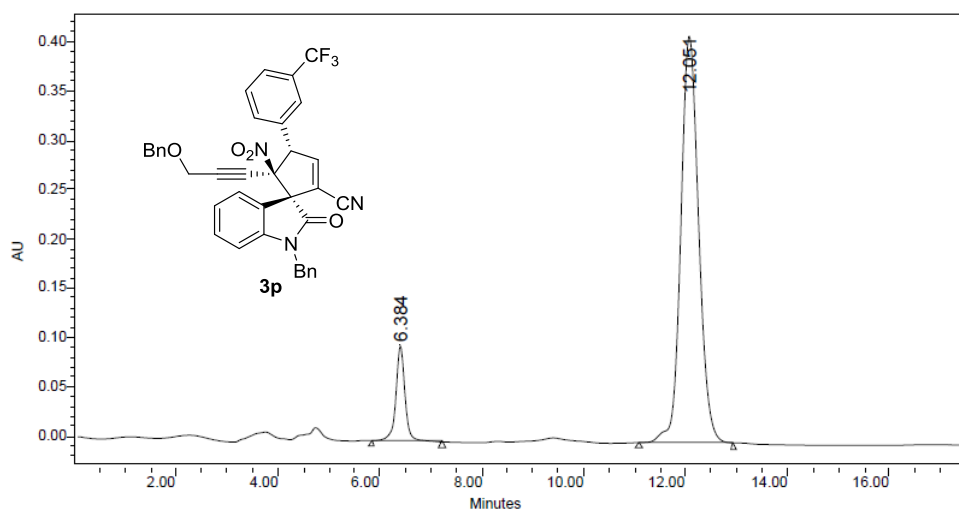

|   | RT (min) | Area (*sec) | % Area | Height ( ) | % Height |
|---|----------|-------------|--------|------------|----------|
| 1 | 6.384    | 1197374     | 10.67  | 96185      | 18.93    |
| 2 | 12.051   | 10027796    | 89.33  | 411957     | 81.07    |

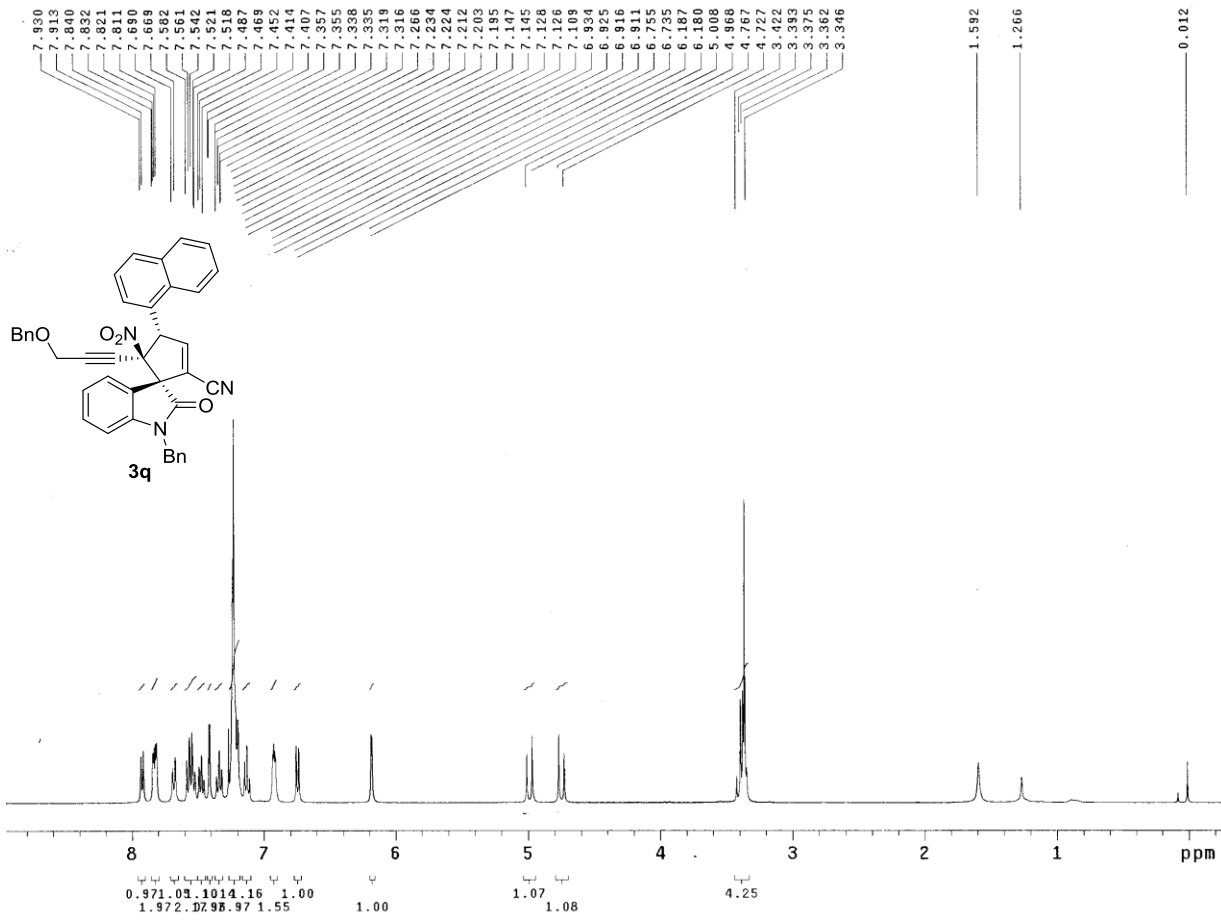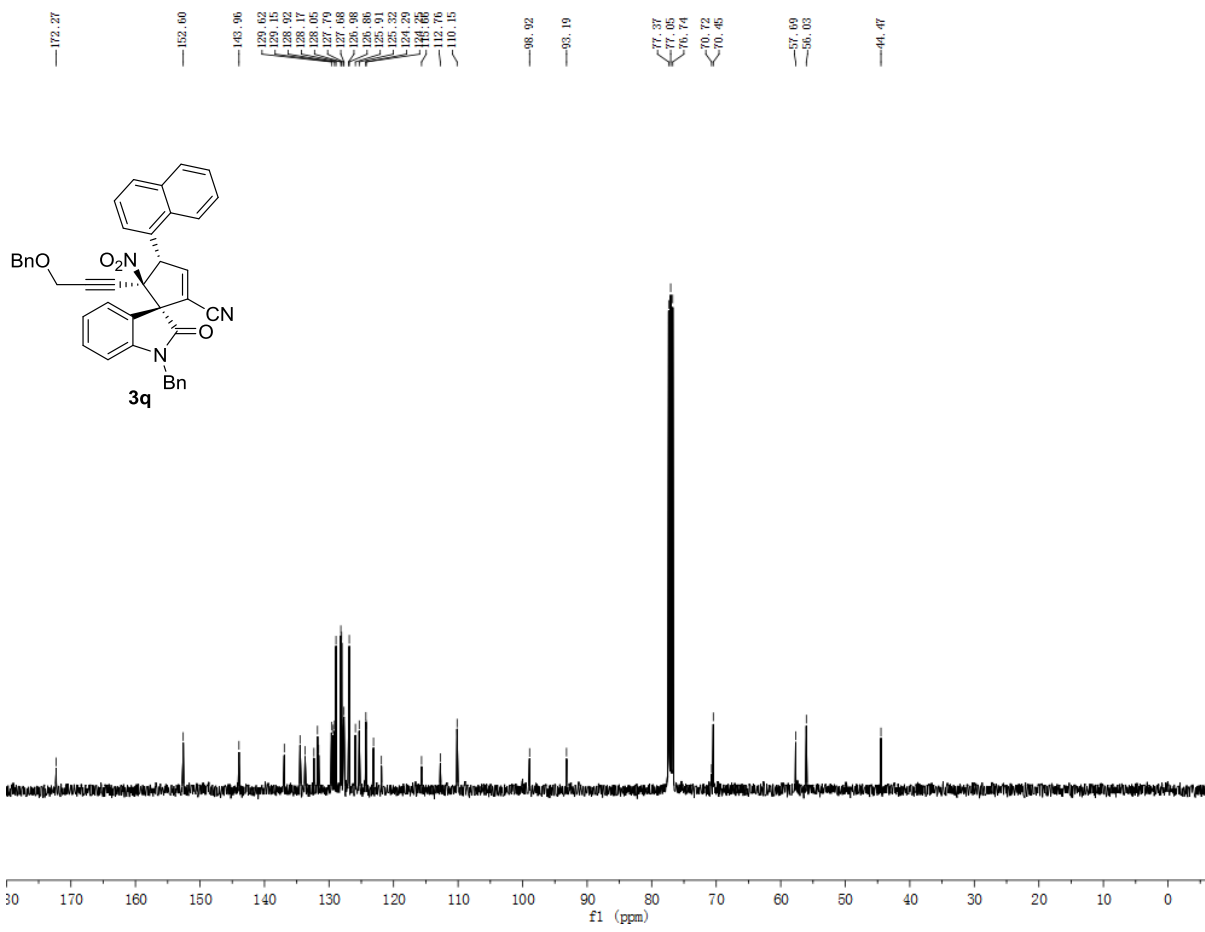

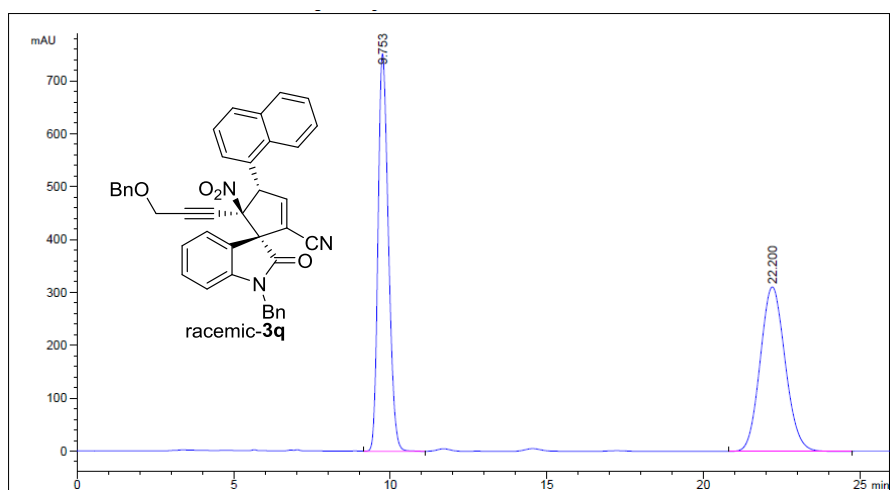

| Peak # | RetTime [min] | Type | Width [min] | Area mAU  | *s | Height [mAU] | Area %  |
|--------|---------------|------|-------------|-----------|----|--------------|---------|
| 1      | 9.753         | VV   | 0.3610      | 1.72428e4 |    | 750.99896    | 50.0120 |
| 2      | 22.200        | BB   | 0.8616      | 1.72346e4 |    | 311.21744    | 49.9880 |

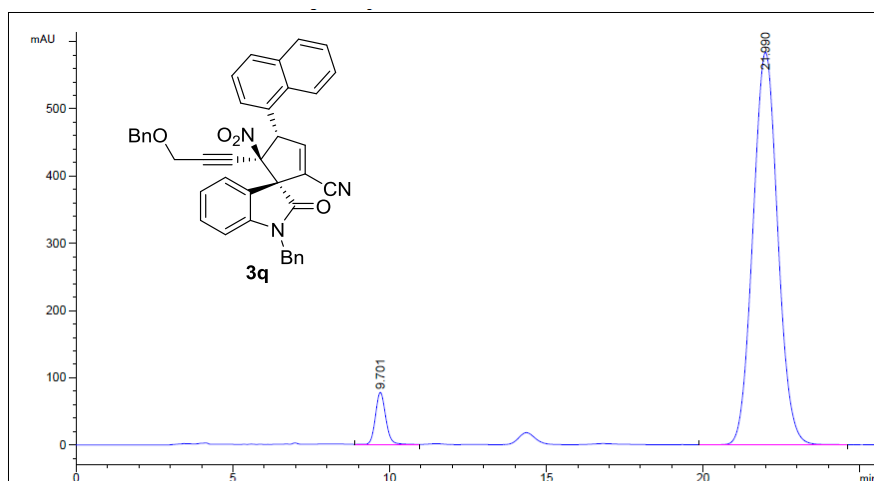

| Peak # | RetTime [min] | Type | Width [min] | Area mAU   | *s | Height [mAU] | Area %  |
|--------|---------------|------|-------------|------------|----|--------------|---------|
| 1      | 9.701         | VV   | 0.3671      | 1875.56079 |    | 78.22633     | 5.4988  |
| 2      | 21.690        | VB   | 0.8538      | 3.22330e4  |    | 583.84595    | 94.5012 |

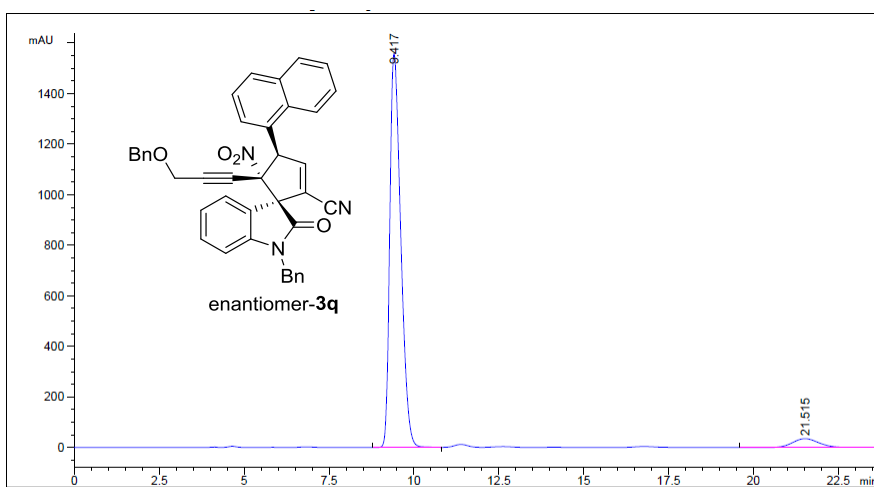

| Peak # | RetTime [min] | Type | Width [min] | Area mAU   | *s | Height [mAU] | Area %  |
|--------|---------------|------|-------------|------------|----|--------------|---------|
| 1      | 9.417         | VV   | 0.3497      | 3.49691e4  |    | 1555.32178   | 94.8537 |
| 2      | 21.515        | BBA  | 0.8408      | 1897.23730 |    | 35.07074     | 5.1463  |

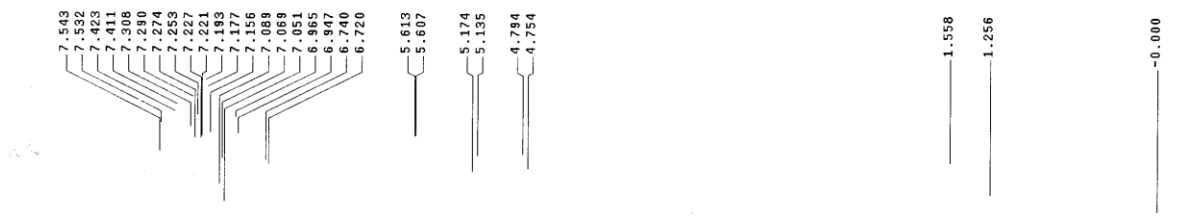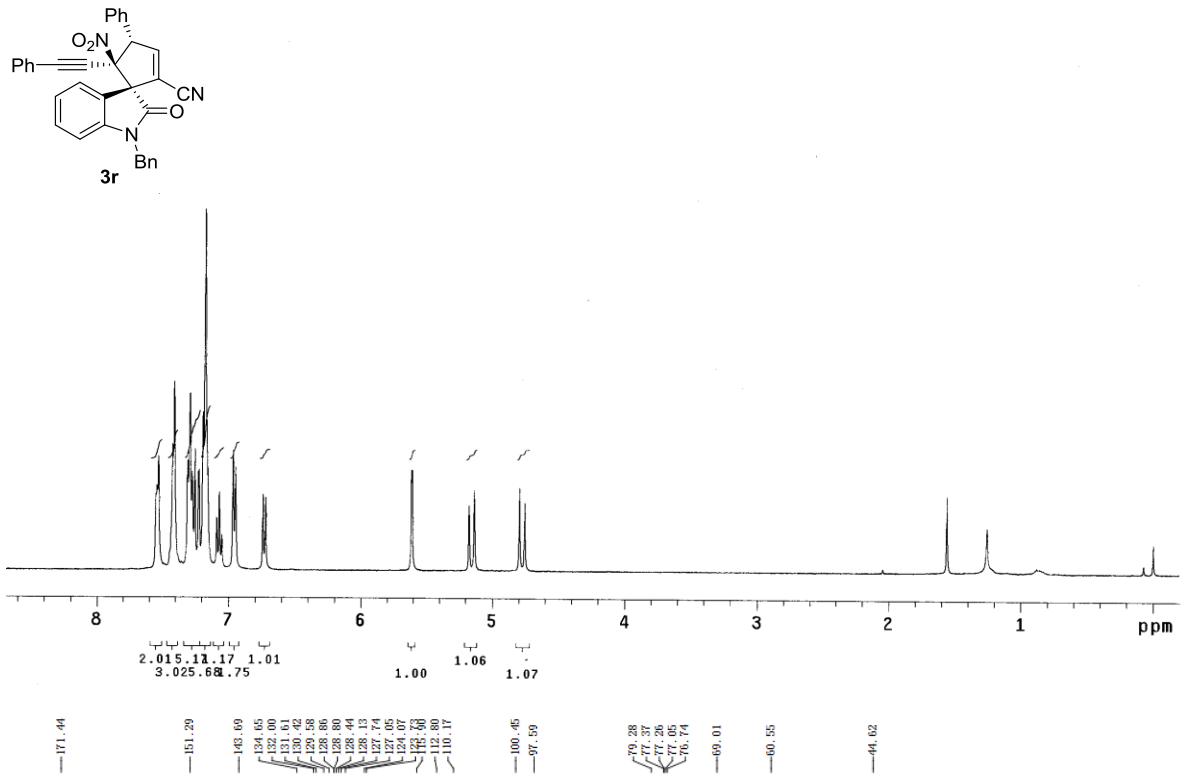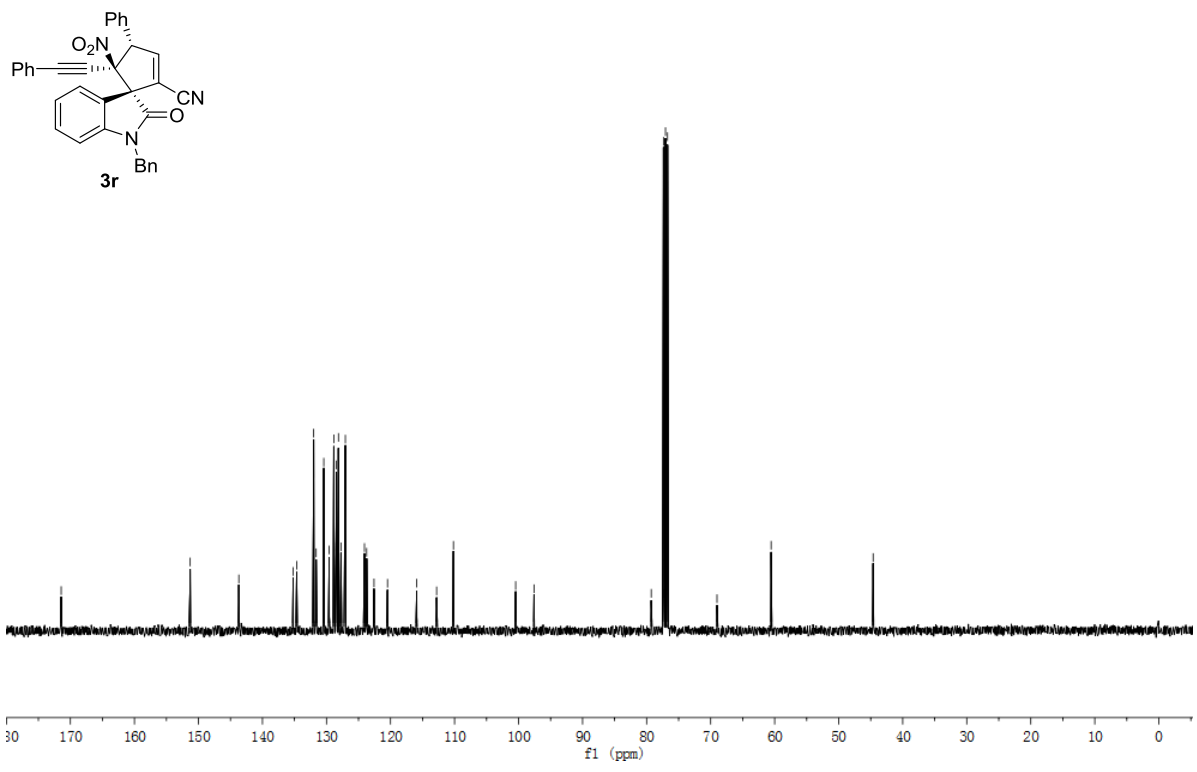



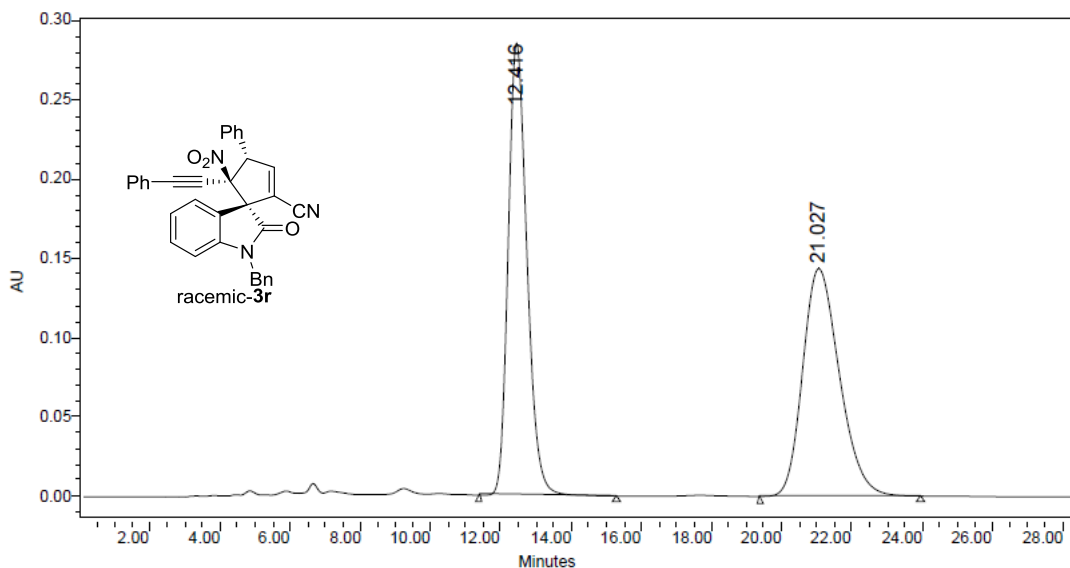

|   | RT (min) | Area (*sec) | % Area | Height ( ) | % Height |
|---|----------|-------------|--------|------------|----------|
| 1 | 12.416   | 10606392    | 50.33  | 285491     | 66.52    |
| 2 | 21.027   | 10467560    | 49.67  | 143684     | 33.48    |

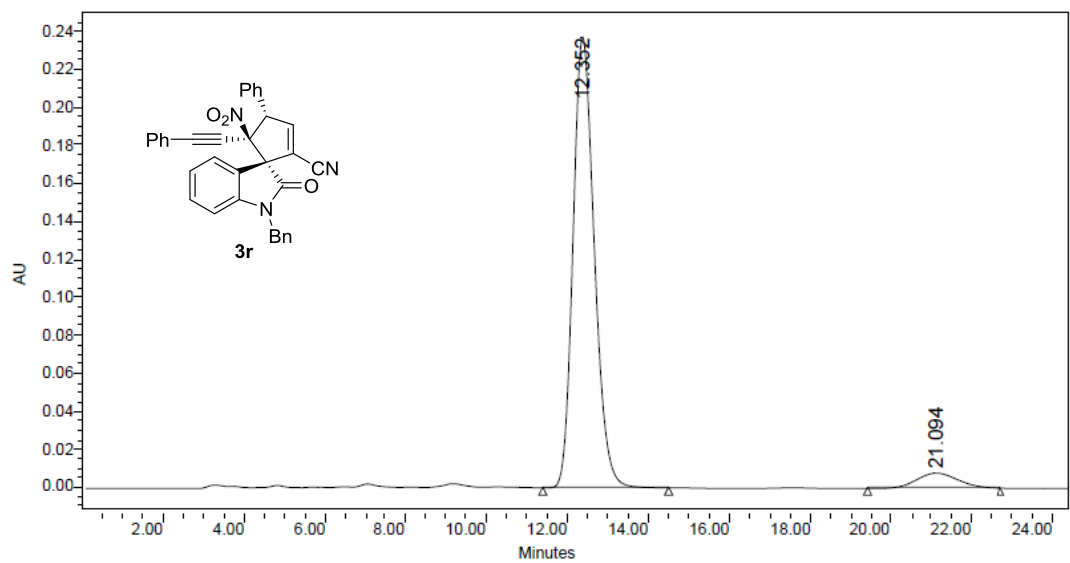

|   | RT (min) | Area (*sec) | % Area | Height ( ) | % Height |
|---|----------|-------------|--------|------------|----------|
| 1 | 12.352   | 8643170     | 93.77  | 237211     | 96.74    |
| 2 | 21.094   | 574192      | 6.23   | 8006       | 3.26     |

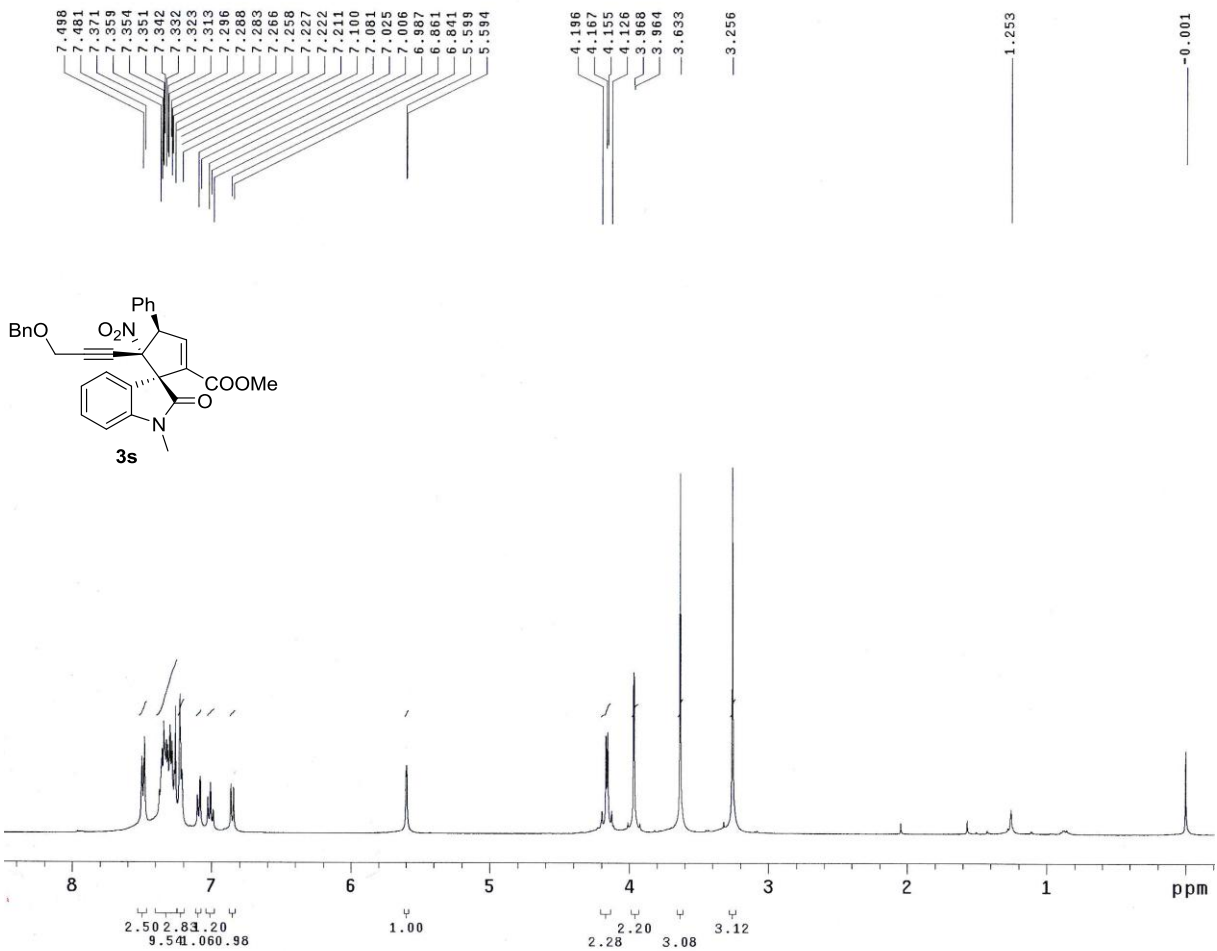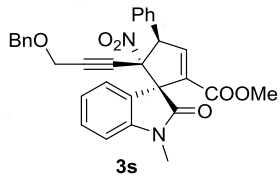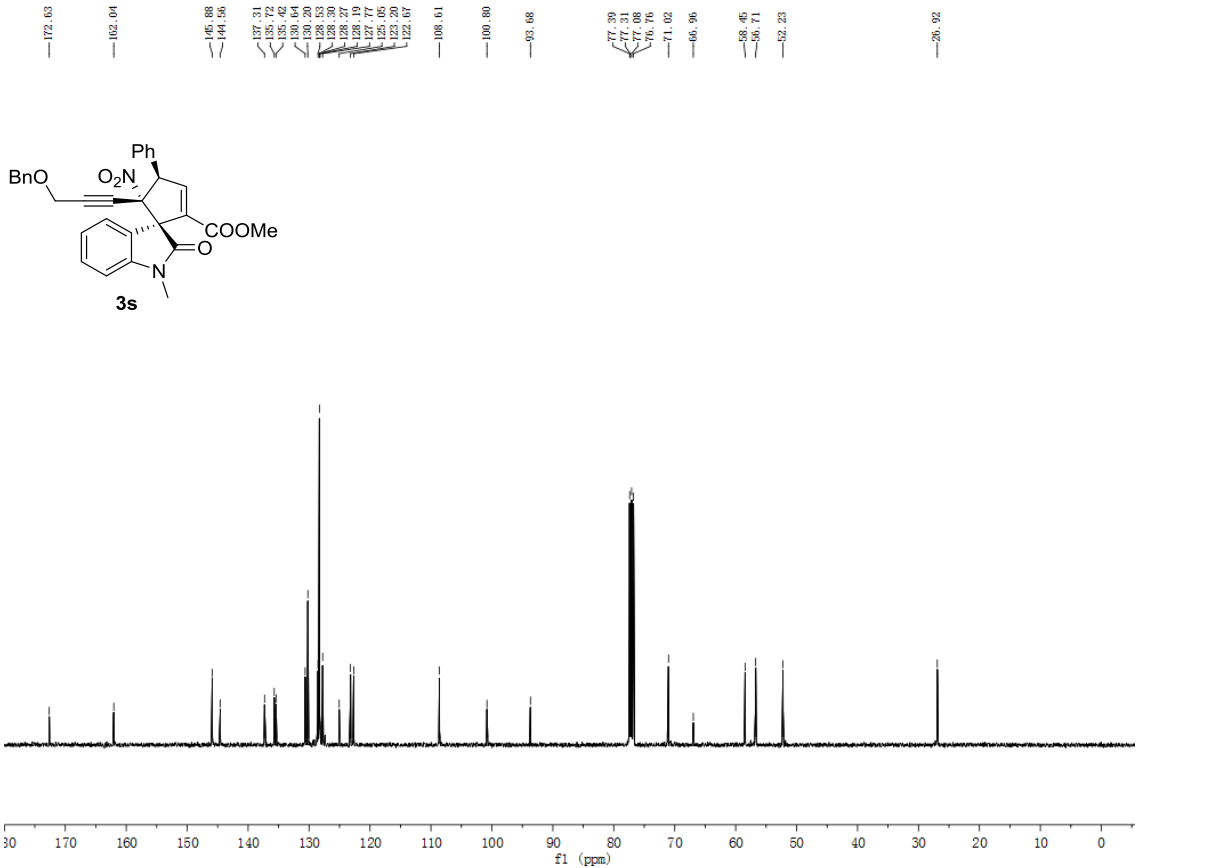

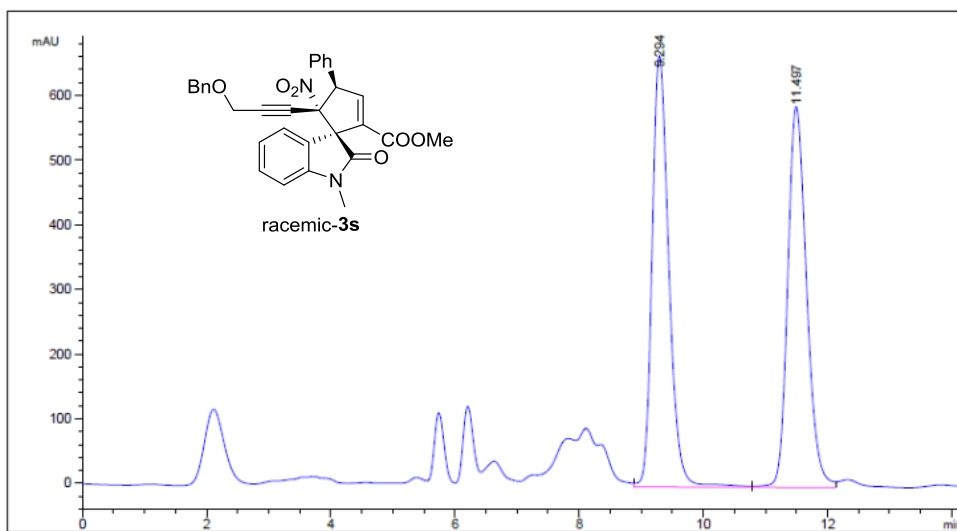

Signal 1: VWD1 A, Wavelength=254 nm

| Peak # | RetTime [min] | Type | Width [min] | Area mAU  | *s | Height [mAU] | Area %  |
|--------|---------------|------|-------------|-----------|----|--------------|---------|
| 1      | 9.294         | VV   | 0.3010      | 1.24897e4 |    | 663.96277    | 50.1527 |
| 2      | 11.497        | VV   | 0.3287      | 1.24137e4 |    | 585.95331    | 49.8473 |

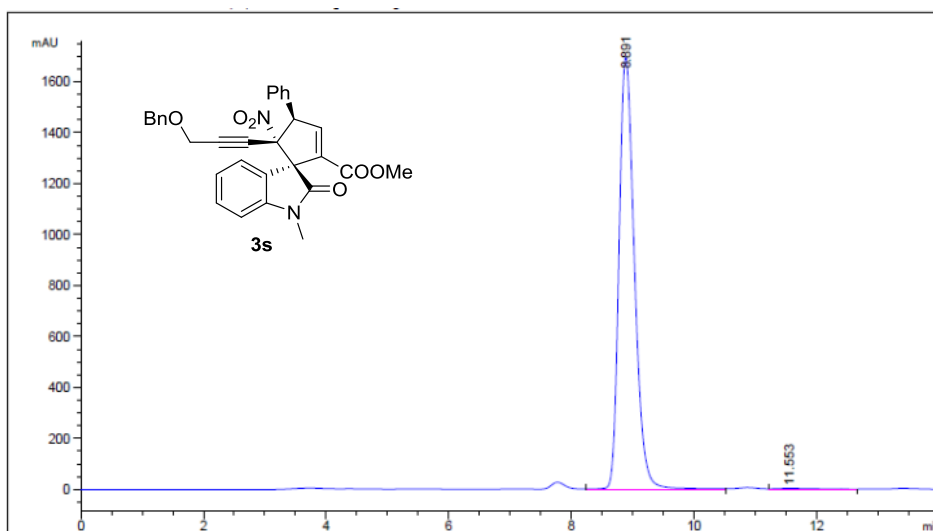

Signal 1: VWD1 A, Wavelength=254 nm

| Peak # | RetTime [min] | Type | Width [min] | Area mAU  | *s | Height [mAU] | Area %  |
|--------|---------------|------|-------------|-----------|----|--------------|---------|
| 1      | 8.891         | VV   | 0.2765      | 2.97280e4 |    | 1679.03918   | 99.2202 |
| 2      | 11.553        | VV   | 0.7938      | 233.64839 |    | 4.09496      | 0.7798  |

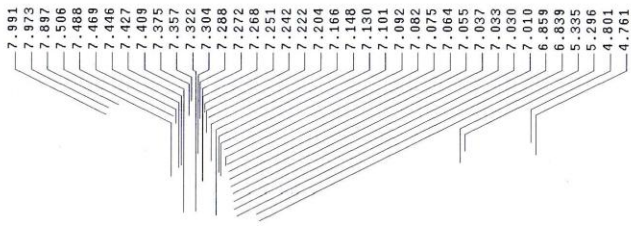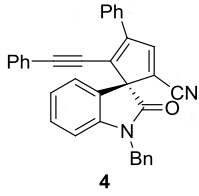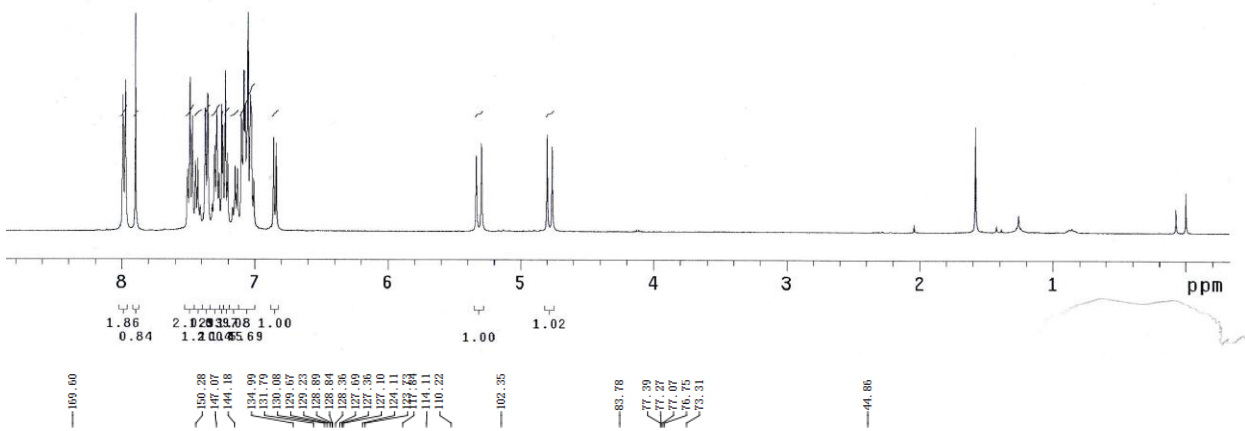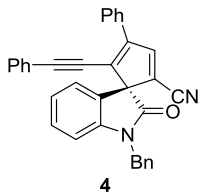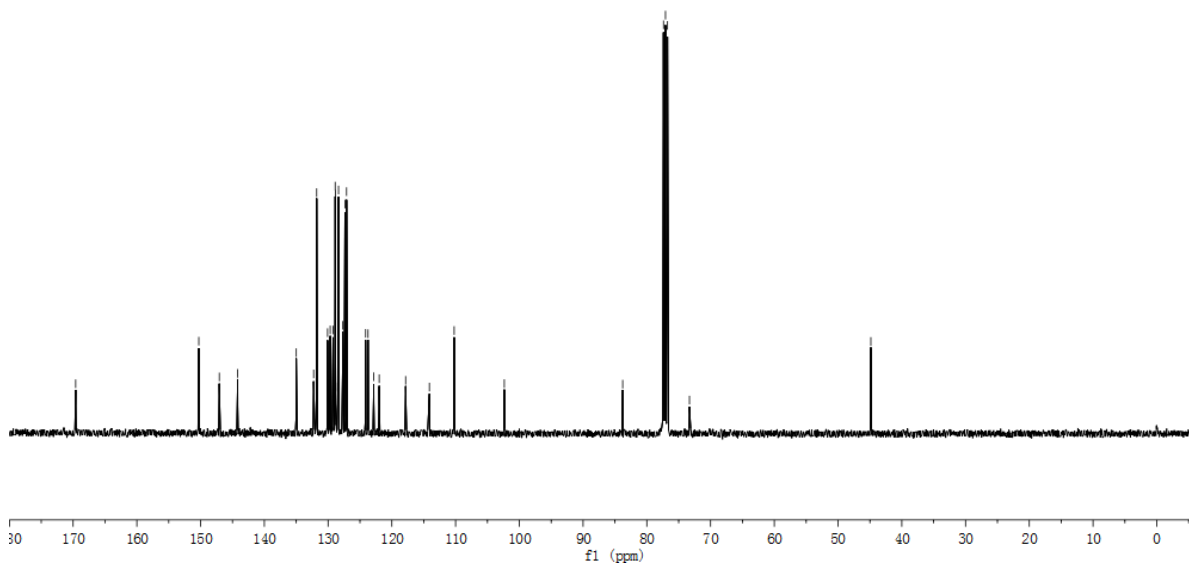

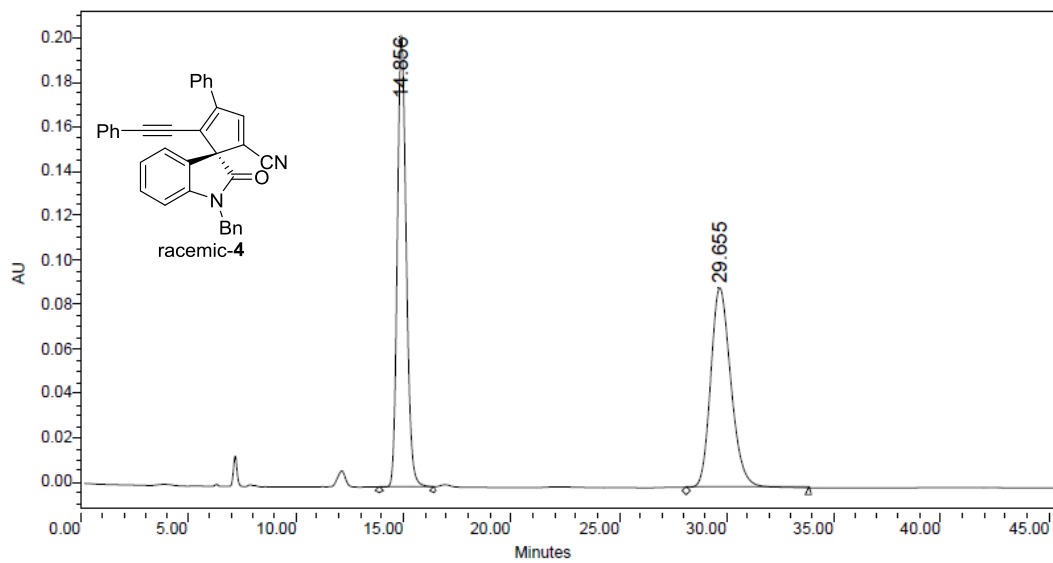

|   | RT (min) | Area ( *sec) | % Area | Height ( ) | % Height |
|---|----------|--------------|--------|------------|----------|
| 1 | 14.856   | 5869992      | 49.88  | 202889     | 69.29    |
| 2 | 29.655   | 5898840      | 50.12  | 89912      | 30.71    |

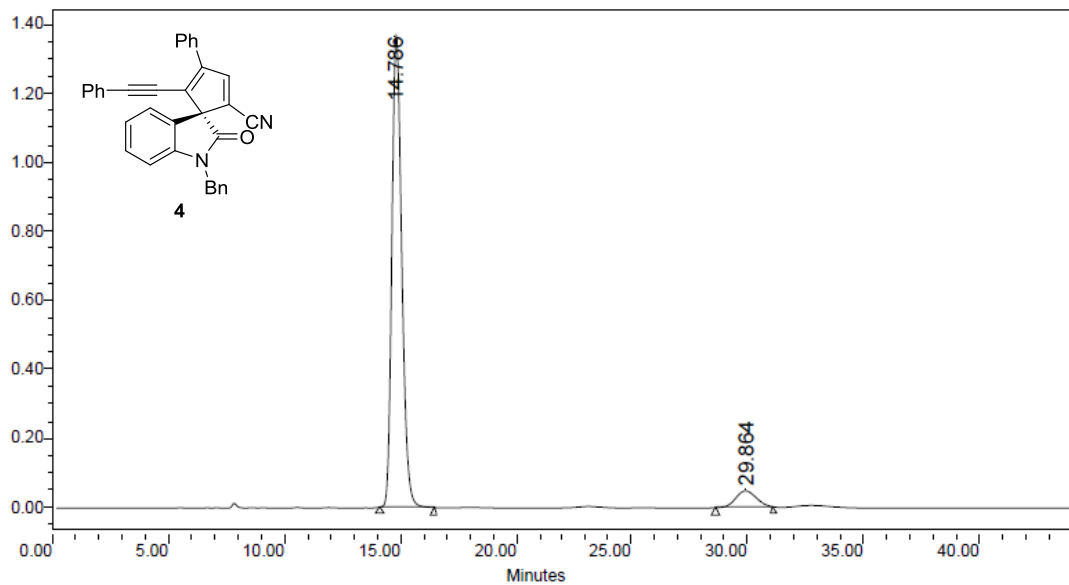

|   | RT (min) | Area ( *sec) | % Area | Height ( ) | % Height |
|---|----------|--------------|--------|------------|----------|
| 1 | 14.786   | 40609924     | 93.17  | 1366951    | 96.62    |
| 2 | 29.864   | 2975102      | 6.83   | 47873      | 3.38     |

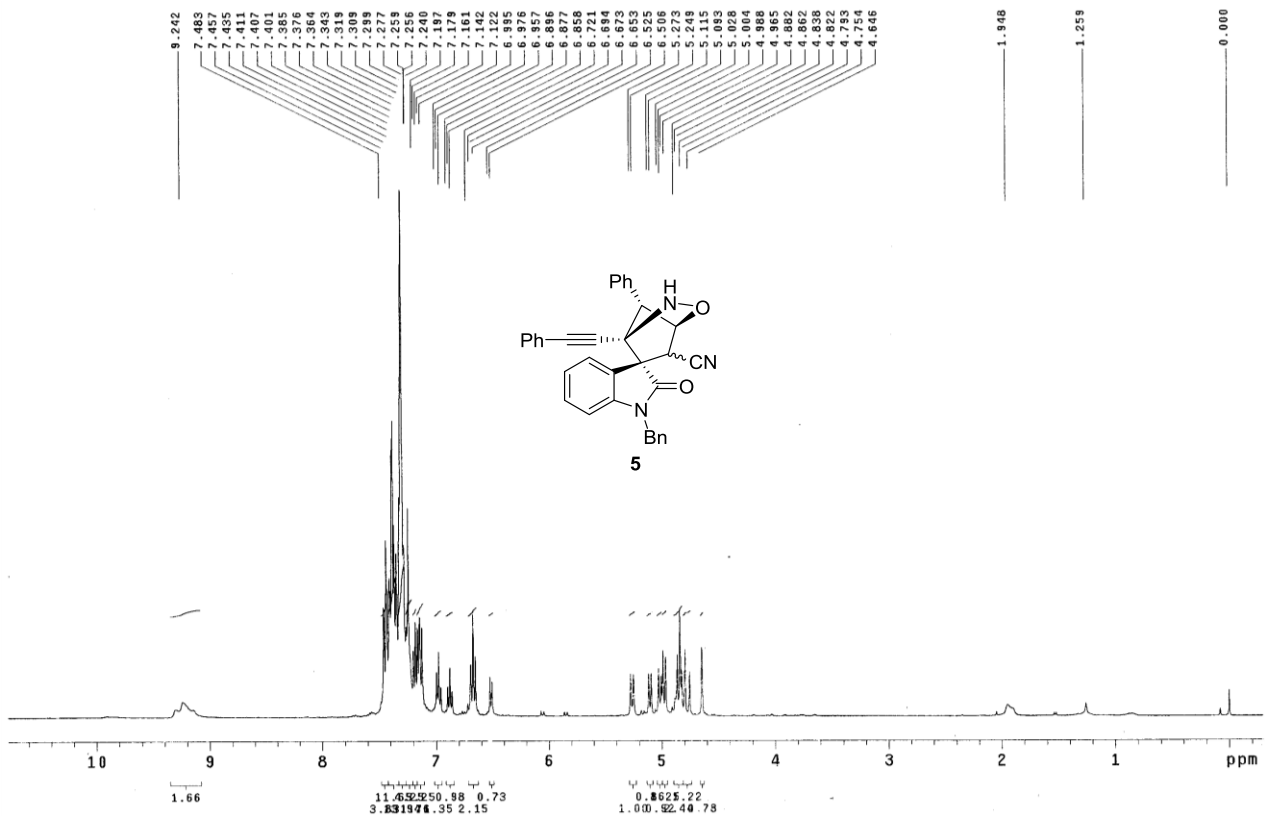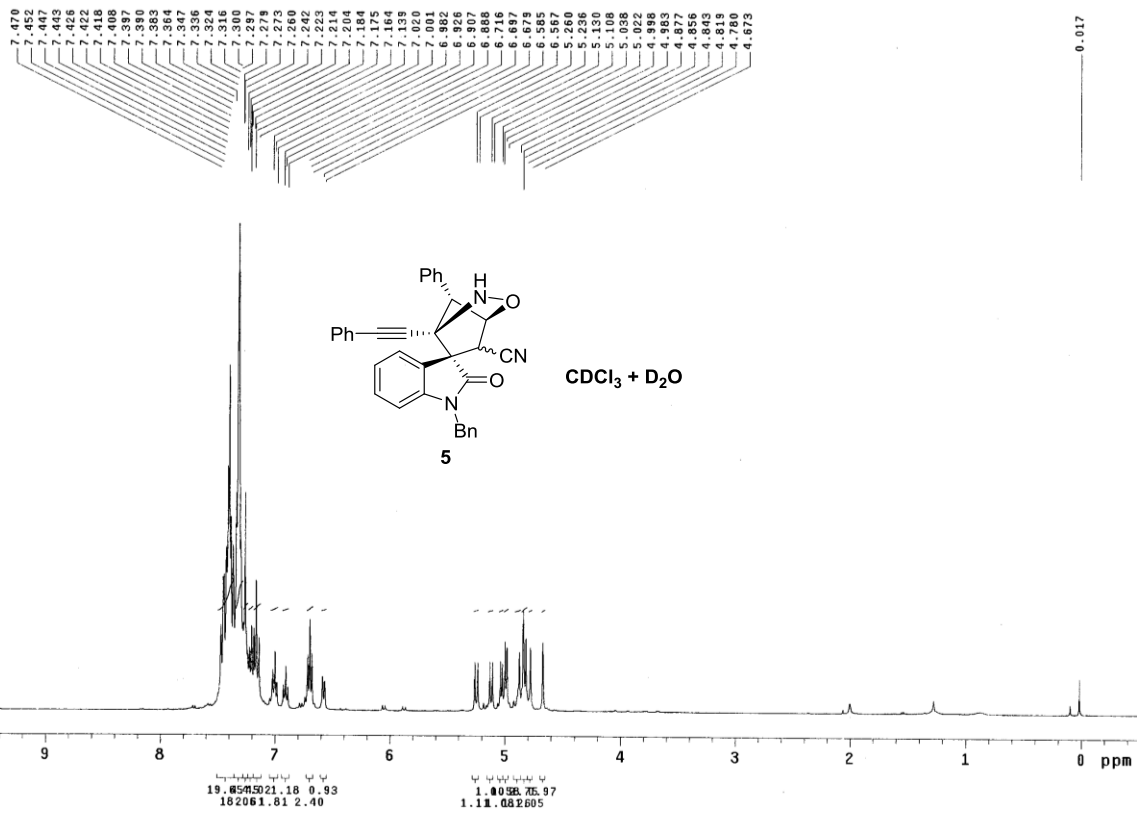

173.09  
172.94  
149.66  
149.50  
132.18  
132.13  
129.41  
129.29  
129.02  
128.85  
128.63  
128.44  
128.36  
128.28  
128.10  
127.78  
127.24  
126.73  
116.67  
112.57  
112.38  
109.83  
103.22  
102.75  
78.58  
78.54  
77.32  
77.20  
77.00  
76.88  
49.21  
48.73  
46.31  
46.10  
44.29

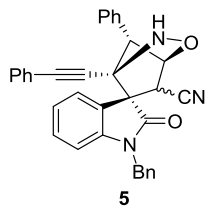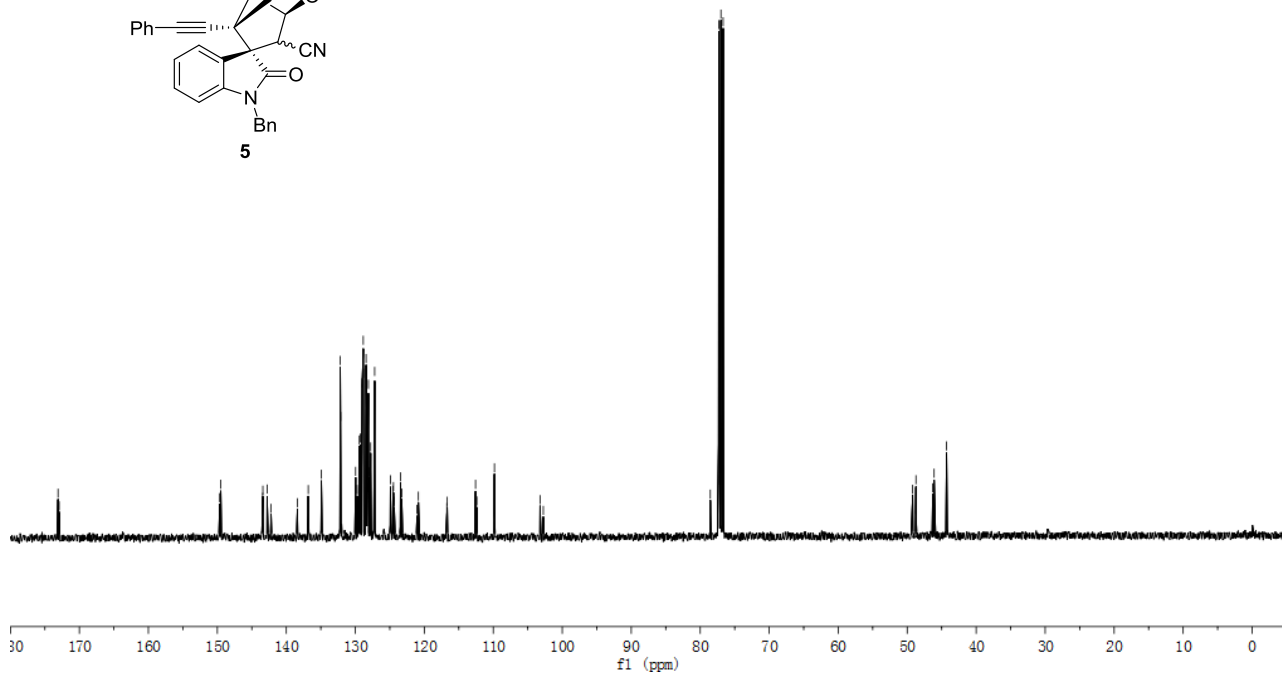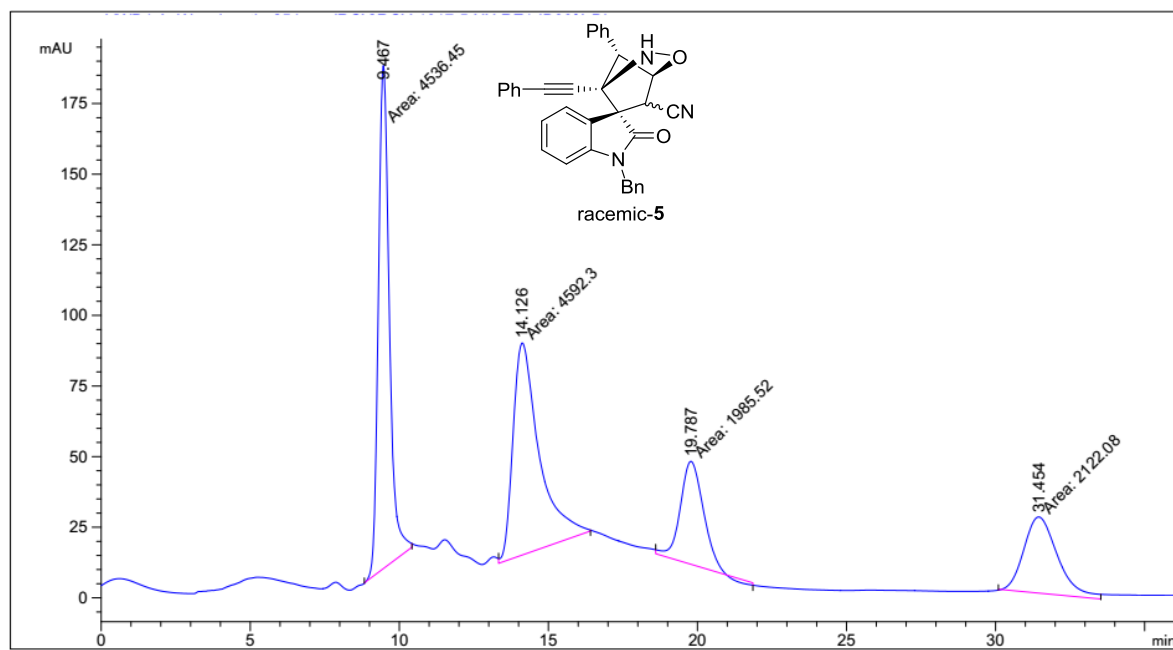

| Peak # | RetTime [min] | Type | Width [min] | Area mAU   | Area *s | Height [mAU] | Area %  |
|--------|---------------|------|-------------|------------|---------|--------------|---------|
| 1      | 9.467         | MM   | 0.4240      | 4536.45264 |         | 178.30330    | 34.2727 |
| 2      | 14.126        | MM   | 1.0189      | 4592.29932 |         | 75.12148     | 34.6946 |
| 3      | 19.787        | MM   | 0.9084      | 1985.52026 |         | 36.42939     | 15.0005 |
| 4      | 31.454        | MM   | 1.3119      | 2122.08081 |         | 26.96021     | 16.0322 |

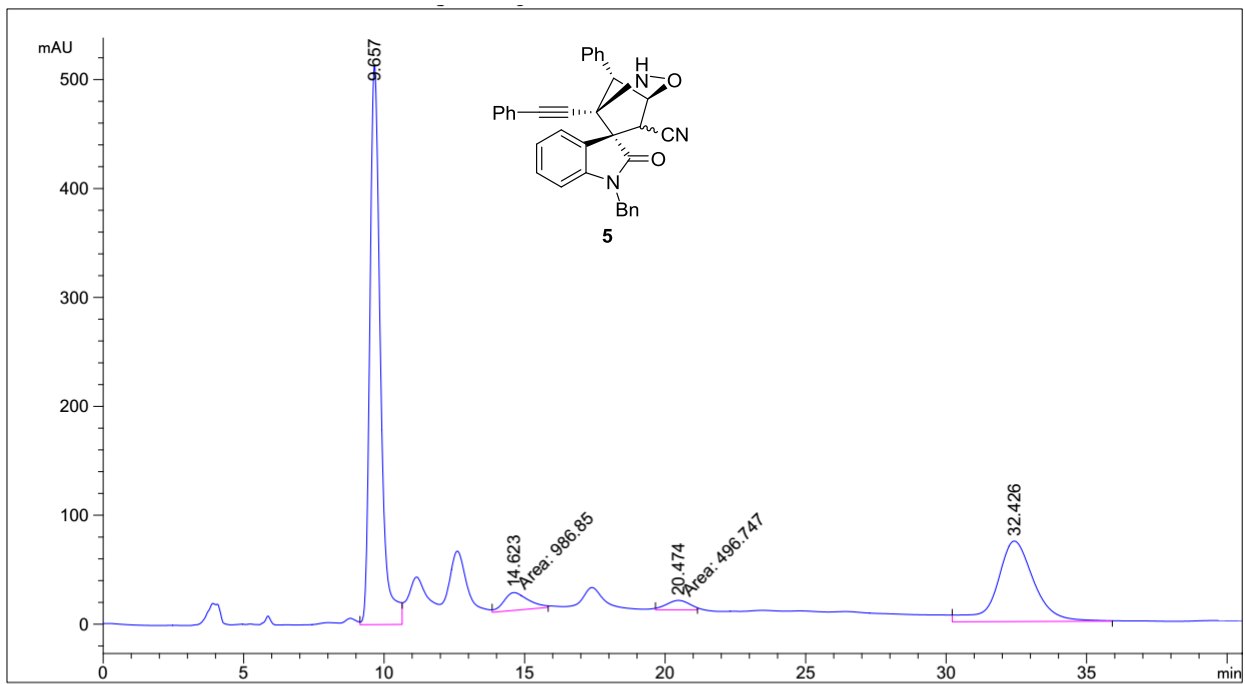

| Peak # | RetTime [min] | Type | Width [min] | Area mAU   | Area *s | Height [mAU] | Area %  |
|--------|---------------|------|-------------|------------|---------|--------------|---------|
| 1      | 9.657         | VV   | 0.4038      | 1.33904e4  |         | 512.61932    | 61.9293 |
| 2      | 14.623        | MM   | 1.0064      | 986.84979  |         | 16.34323     | 4.5641  |
| 3      | 20.474        | MM   | 0.9490      | 496.74673  |         | 8.72362      | 2.2974  |
| 4      | 32.426        | VB   | 1.3677      | 6748.06250 |         | 73.93297     | 31.2092 |
